1 Manuscript type: Article

2 Running head: MORPHOLOGY AND SEED PLANT PHYLOGENY

3

4 **Experimental signal dissection and method sensitivity analyses reaffirm the**  
5 **potential of fossils and morphology in the resolution of the relationship of**  
6 **angiosperms and Gnetales**

7

8 Mario Coiro<sup>1\*</sup>, Guillaume Chomicki<sup>2,3</sup>, James A. Doyle<sup>4</sup>

9 <sup>1</sup>Department of Systematic and Evolutionary Botany, University of Zurich, 8008 Zurich,

10 Switzerland. <sup>2</sup>Department of Plant Sciences, University of Oxford, South Parks Road, Oxford OX1

11 3RB, UK.

12 <sup>3</sup>The Queen's College, University of Oxford, High St, Oxford OX1 4AW, UK.

13 <sup>4</sup>Department of Evolution and Ecology, University of California, Davis, CA 95616, USA.

14 \*Correspondence to be sent to: [mario.coiro@systbot.uzh.ch](mailto:mario.coiro@systbot.uzh.ch)

15

16

17

18

## 19 **Abstract**

20 The placement of angiosperms and Gnetales in seed plant phylogeny remains one of the most  
21 enigmatic problems in plant evolution, with morphological analyses (which have usually included  
22 fossils) and molecular analyses pointing to very distinct topologies. Almost all morphology-based  
23 phylogenies group angiosperms with Gnetales and certain extinct seed plant lineages, while most  
24 molecular phylogenies link Gnetales with conifers. In this study, we investigate the phylogenetic  
25 signal present in published seed plant morphological datasets. We use parsimony, Bayesian  
26 inference, and maximum likelihood approaches, combined with a number of experiments with the  
27 data, to address the morphological-molecular conflict. First, we ask whether the lack of association  
28 of Gnetales with conifers in morphological analyses is due to an absence of signal or to the  
29 presence of competing signals, and second, we compare the performance of parsimony and model-  
30 based approaches with morphological datasets. Our results imply that the grouping of Gnetales and  
31 angiosperms is largely the result of long branch attraction, consistent across a range of  
32 methodological approaches. Thus, there is a signal for the grouping of Gnetales with conifers in  
33 morphological matrices, but it was swamped by convergence between angiosperms and Gnetales,  
34 both situated on long branches. However, this effect becomes weaker in more recent analyses, as a  
35 result of addition and critical reassessment of characters. Even when a clade including angiosperms  
36 and Gnetales is still weakly supported by parsimony, model-based approaches favor a clade of  
37 Gnetales and conifers, presumably because they are more resistant to long branch attraction.  
38 Inclusion of fossil taxa weakens rather than strengthens support for a relationship of angiosperms  
39 and Gnetales. Our analyses finally reconcile morphology with molecules in favoring a relationship  
40 of Gnetales to conifers, and show that morphology may therefore be useful in reconstructing other  
41 aspects of the phylogenetic history of the seed plants.

42

43

#### 44 INTRODUCTION

45 The use of morphology as a source of data for reconstructing phylogenetic relationships has lost  
46 most of its ground since the advent of molecular phylogenetics, except in paleontology. However,  
47 there has recently been renewed interest in morphological phylogenetics (Pyron 2015; Lee and  
48 Palci 2015). This is partly because of increased focus on the phylogenetic placement of fossil taxa  
49 in trees of living organisms, stimulated by the necessity of accurate calibrations for dating the  
50 molecular trees that have become the main basis for comparative evolutionary studies. This has led  
51 to the development of methods that integrate phylogenetic placement of fossils in the dating process  
52 (Pyron 2011; Ronquist et al. 2012; Zhang et al. 2016). Another focus has been the application of  
53 statistical phylogenetics to morphological data on both a theoretical (Wright et al. 2014, 2015;  
54 O'Reilly et al. 2016) and an empirical level (Lee and Worthy 2012; Godefroit et al. 2013; Cau et al.  
55 2015). In paleontology, where only morphological data are available (except in the recent past),  
56 questions on the role of morphology in phylogenetics are even more critical. A major issue concerns  
57 the value of fossils in reconstructing relationships among living organisms. Early in the history of  
58 phylogenetics, there were claims that fossils are incapable of overturning phylogenetic relationships  
59 inferred from living taxa (Patterson 1981), but also demonstrations that they can, as for instance in  
60 morphological analysis of amniote phylogeny (Gauthier et al. 1988). Whether or not fossils affect  
61 the inferred topology of living taxa, there is little doubt that they are often either useful or necessary  
62 in elucidating the homologies of novel structures (e.g., the seed plant ovule and eustele) and the  
63 order of origin of the morphological synapomorphies of extant (crown) groups (e.g., origin of  
64 secondary growth before the ovule in the seed plant line), as discussed in Doyle (2013). This is  
65 critical because major groups, such as the now-dominant angiosperms (flowering plants), are often  
66 separated from their closest living relatives by major morphological gaps (numbers of character  
67 changes), even if the incorporation of fossils does not affect inferred relationships among living  
68 taxa (Doyle and Donoghue 1987; Donoghue et al. 1989).

69 Many phylogenies based on morphology have been recently published for important groups  
70 with both living and fossil representatives, including mammals (O’Leary et al. 2013), squamate  
71 reptiles (Gauthier et al. 2012), arthropods (Legg et al. 2013), and the genus *Homo* (Dembo et al.  
72 2016). However, the validity and use of morphological data in reconstructing phylogeny have been  
73 severely criticized, notably by Scotland et al. (2003), based on supposed diminishing returns in the  
74 discovery of new morphological characters and the prevalence of functional convergence. The  
75 painstaking acquisition of morphological characters, which requires a relatively large amount of  
76 training and time, could turn out to be systematically worthless if the phylogenetic signal present in  
77 these data is either insufficient or misleading. Indeed, the number of characters that can be coded  
78 for morphological datasets represents a major limit to the use of morphology and its integration  
79 with molecular data, especially in the age of phylogenomics, where the ever-increasing amount of  
80 molecular signal could simply “swamp” the weak signal present in morphological datasets (Doyle  
81 and Endress 2000; Bateman et al. 2006). Morphological data may also be afflicted to a higher  
82 degree than molecules by functional convergence and parallelism (Givnish and Sytsma 1997),  
83 which could lead a morphological dataset to infer a wrong phylogenetic tree. Even though the  
84 confounding effect of convergence has been formally tested in only a few studies (Wiens et al.  
85 2003), it seems to be at the base of one of the deepest cases of conflict between molecules and  
86 morphology in the reconstruction of evolutionary history, namely the phylogeny of placental  
87 mammals (Foley et al. 2016). In this case, the strong effect of selection on general morphology  
88 caused by similar lifestyle seems to hinder attempts to use morphology to reconstruct phylogenetic  
89 history in this group (Springer et al. 2007), and it affects even large “phenomic” datasets (Springer  
90 et al. 2013).

91 Another example of conflict between morphology and molecular data involves the  
92 relationships among seed plants, particularly angiosperms and the highly derived living seed plant  
93 order Gnetales. Before the advent of cladistics, some authors proposed that angiosperms and  
94 Gnetales were closest living relatives, while others argued that these two groups were strictly

95 convergent and Gnetales were instead related to conifers (for a review, see Doyle and Donoghue  
96 1986). However, since the earliest studies by Parenti (1980) and Hill and Crane (1982), which  
97 included only living taxa, the view that angiosperms are most closely related to Gnetales has  
98 appeared to be one of most stable results of morphologically based parsimony analyses of seed  
99 plant phylogeny (Crane 1985a; Doyle and Donoghue 1986, 1992; Nixon et al. 1994; Rothwell and  
100 Serbet 1994; Doyle 1996, 2006, 2008; Hilton and Bateman 2006; Friis et al. 2007; Rothwell et al.  
101 2009; Rothwell and Stockey 2016; Fig. 1). The first analysis that included fossils, by Crane (1985a),  
102 associated angiosperms and Gnetales with Mesozoic Bennettitales and *Pentoxylon*. Because all four  
103 taxa have more or less flower-like reproductive structures, this clade became known as the  
104 anthophytes, a term formerly used for angiosperms, to emphasize its implication that the flower was  
105 a synapomorphy not of angiosperms alone but rather of a larger clade to which they belong (Crane  
106 1985b; Doyle and Donoghue 1986). Some subsequent analyses interpolated the Mesozoic fossil  
107 *Caytonia* into this clade as the closest outgroup of angiosperms (Doyle 1996, 2006, 2008; Hilton  
108 and Bateman 2006; Friis et al. 2007). This result calls into question the original concept of  
109 anthophytes as a clade united by flowers, since *Caytonia* had large sporophylls that are unlikely to  
110 have been grouped into flower-like structures. However, all trees found in morphological analyses,  
111 with the exception of some in Doyle (2008), have agreed that Gnetales are the closest living  
112 relatives of angiosperms. Some analyses associated the clade including angiosperms and Gnetales  
113 with “Mesozoic seed ferns” (such as glossopterids, corystosperms, and *Caytonia*), others with  
114 “coniferophytes” (conifers, *Ginkgo*, and fossil cordaites). Inferred relationships within the clade  
115 have also varied: in some cases angiosperms and Gnetales are sister groups, in others Gnetales are  
116 linked with Bennettitales. Because some studies place taxa without flower-like structures in the  
117 clade, and molecular data are unable to distinguish such trees from anthophyte trees in the original  
118 sense, we refer to the whole class of trees in which angiosperms and Gnetales are closest living  
119 relatives as “gnetangiosperm” rather than “anthophyte” trees.

120 By contrast, since the advent of molecular phylogenetics, the hypothesis that angiosperms

121 and Gnetales are closely related has lost most of its support among plant biologists. Although  
122 molecular analyses cannot directly evaluate the status of putatively related fossil taxa, they can  
123 address the relationship of angiosperms and Gnetales. Molecular data from different genomes  
124 analyzed with different approaches do not yield a Gnetales plus angiosperm clade, with the  
125 exception of few maximum parsimony (MP) and neighbor joining analyses of nuclear ribosomal  
126 RNA or DNA (Hamby and Zimmer 1992; Stefanovic et al. 1998; Rydin et al. 2002) and one MP  
127 analysis of *rbcL* (Rydin and Källersjö 2002). The majority of molecular analyses retrieve a clade of  
128 Gnetales plus Pinaceae (Bowe et al. 2000; Chaw et al. 2000; Gugerli et al. 2001; Qiu et al. 2007;  
129 Zhong et al. 2011), conifers other than Pinaceae (cupressophytes) (Nickrent et al. 2000; Rydin and  
130 Källersjö 2002), or conifers as a whole (Wickett et al. 2014), which we refer to collectively as  
131 “gneconifer” trees. In most of these trees angiosperms are the sister group of all other living seed  
132 plants (acrogymnosperms: Cantino et al. 2007). The main exceptions are “Gnetales-basal” trees, in  
133 which Gnetales are sister to all other living seed plants (e.g., Albert et al. 1994; Rydin and Källersjö  
134 2002).

135         Several potential issues have been identified with both sorts of data. Regarding molecules,  
136 these include limited taxonomic sampling resulting from extinction of the majority of seed plant  
137 lineages (Rothwell et al. 2009), loss of phylogenetic signal due to saturation (particularly at third  
138 codon positions), strong rate heterogeneity among sites across lineages and conflict between gene  
139 trees (Mathews 2009), composition biases among synonymous substitutions (Cox et al. 2014), as  
140 well as systematic errors and biases (Sanderson et al. 2000; Magallón and Sanderson 2002;  
141 Burleigh and Mathews 2007; Zhong et al. 2011), leading to a plethora of conflicting signals. In  
142 analyzing datasets that yielded Gnetales-basal trees, studies that have attempted to correct for these  
143 biases have generally favored trees in which Gnetales are associated with conifers (Sanderson et al.  
144 2000; Magallón and Sanderson 2002; Burleigh and Mathews 2007). Regarding morphology, in  
145 addition to far more complex problems in definition of characters and the role of functional  
146 convergence in confounding relationships, it has been shown that different taxon sampling

147 strategies (which can also cause problems in molecular studies: Rydin and Källersjö 2002), such as  
148 choice of the closest progymnosperm outgroup of seed plants (Hilton and Bateman 2006), can lead  
149 to different results concerning the rooting of the seed plants.

150         The conflict between molecules and morphology has led to different attitudes toward  
151 morphological data within the botanical community (Donoghue and Doyle 2000; Scotland et al.  
152 2003; Bateman et al. 2006; Rothwell et al. 2009). Following suggestions of Donoghue and Doyle  
153 (2000), Doyle (2006, 2008) reconsidered several supposed homologies between angiosperms and  
154 Gnetales in the light of the molecular results. These studies and the analysis of Hilton and Bateman  
155 (2006) also incorporated newly recognized similarities between Gnetales and conifers, for example  
156 in wood anatomy (Carlquist 1996), as well as new evidence on the morphology of the seed-bearing  
157 cupules in fossil taxa. Other changes involved redefinition of characters to reduce potential biases.  
158 For example, when building a morphological matrix, dissecting a character into more character  
159 states may represent an improvement by distinguishing convergent states and avoiding bias toward  
160 particular phylogenetic hypotheses during primary homology assessment (Jenner 2004; Zou and  
161 Zhang 2016), although it may be disadvantageous because it leads to a lack of resolution when the  
162 number of states becomes excessive. In seed plants, there are many special factors that complicate  
163 character coding. Among living taxa, the assessment of homology is complicated by the plastic and  
164 modular nature of plant development (Mathews and Kramer 2012). Among fossil taxa, the mode of  
165 preservation of many key fossils has critical consequences for the amount of data available. This  
166 affects not only the number of missing characters, but also the process of primary homology  
167 assessment and character coding. Although these issues with coding are most severe in fossils  
168 preserved as compressions, such as *Caytonia* (Doyle 2008; Rothwell et al. 2009) and *Archaeofructus*  
169 (Sun et al. 2002; Friis et al. 2003; Doyle 2008; Rudall and Bateman 2008; Endress and Doyle 2009;  
170 Doyle and Endress 2014), even fossil groups that are exquisitely preserved as permineralizations  
171 (e.g., Bennettitales) are not immune to conflicting interpretations (Friis et al. 2007; Rothwell et al.  
172 2009; Crepet and Stevenson 2010; Doyle 2012, supplemental material; Rothwell and Stockey 2013;

173 Pott 2016).

174       Despite careful reconsideration of potentially convergent traits between Gnetales and  
175 angiosperms, the conflict between morphological and molecular data appeared to persist, with most  
176 morphological parsimony analyses continuing to favor the gnetangiosperm hypothesis (Doyle 2006;  
177 Hilton and Bateman 2006; Rothwell et al. 2009). The possibility that morphological data are  
178 inadequate to resolve such a key aspect of the phylogeny of seed plants would represent a severe  
179 hindrance in understanding plant evolution, especially in the light of the small number of extant  
180 lineages that survived extinction during the Paleozoic and Mesozoic (Mathews 2009) and the great  
181 morphological gaps among the surviving lineages. However, there have been signs that the conflicts  
182 with molecular data are weakening: in the analysis of Doyle (2006), trees in which Gnetales were  
183 nested in conifers were only one step less parsimonious than gnetangiosperm trees, and in Doyle  
184 (2008) trees of the two types became equally parsimonious.

185       In this study, we attempt to elucidate the phylogenetic signal present in published  
186 morphological datasets of the seed plants, concentrating on the relationship of angiosperms and  
187 Gnetales. This is not the only aspect of seed plant phylogeny that varies among and between  
188 morphological and molecular analyses. Another case is whether ginkgophytes (now reduced to  
189 *Ginkgo biloba*) are related to conifers and cordaites, as part of a coniferophyte clade, or to cycads,  
190 as found in some molecular analyses. However, the question of angiosperms and Gnetales is  
191 probably of the broadest evolutionary interest and is especially likely to illustrate the general  
192 problem of long branch effects in highly derived groups. We first test whether the possibility of  
193 convergence between angiosperms and Gnetales represents a major problem by reanalyzing the  
194 matrices that incorporated earlier homology assumptions concerning characters of the two groups  
195 (i.e., the matrices compiled before the incoming of molecular results) and later matrices that revised  
196 such assumptions (the matrices of Doyle 2006 and Hilton and Bateman 2006, and datasets derived  
197 from them) and testing whether the signal and the relative support for the gnetangiosperm and  
198 gneconifer clades changed between these two sets of matrices. After revealing a more coherent



199 signal supporting a gneconifer clade in the more recent matrices, we investigate whether the  
200 retrieval of a gnetangiosperm topology by parsimony analyses was at least partly due to  
201 methodological biases that could be overcome by using model-based methods. Hopefully these  
202 approaches may be useful in resolving cases of conflict between morphological and molecular data  
203 in other taxa, particularly those with significant fossil representatives.

204

## 205 **MATERIALS AND METHODS**

### 206 **Matrices**

207 The matrices of Crane (1985a, version two, in which Bennettitales and *Pentoxylon* were  
208 scored as having cupules potentially homologous with those of Mesozoic seed ferns), Doyle and  
209 Donoghue (1986, 1992), Nixon et al. (1994), Rothwell and Serbet (1994), and Doyle (1996, 2006,  
210 2008) were manually coded from the respective articles. The Hilton and Bateman (2006) matrix  
211 was kindly provided by Richard Bateman. The matrices from Analysis 3 of Rothwell et al. (2009)  
212 and from Rothwell and Stockey (2016) were downloaded from the supplementary materials of the  
213 respective articles.

214

### 215 **Parsimony analyses**

216 We performed parsimony analyses of all matrices with PAUP 4.0a136 (Swofford 2003),  
217 using the heuristic search algorithm with random addition of taxa and 1000 replicates. Bootstrap  
218 analyses were conducted using 10,000 replicates, using the “asis” addition option and keeping one  
219 tree per replicate (Müller 2005).

220 We also conducted analyses with a topological backbone constraint, forcing the Gnetales  
221 into a clade with the extant conifers and leaving the position of other living taxa and fossils

222 unconstrained. Significant differences between the constrained and unconstrained topologies were  
223 evaluated using the Templeton test (Templeton 1983) as implemented in PAUP v. 4.0a136  
224 (Swofford 2003). We investigated the effects of recoding characters by Doyle (2006, 2008) in more  
225 detail by using MacClade (Maddison and Maddison 2003) to compare the number of steps in each  
226 character on trees with Gnetales associated with angiosperms and associated with conifers.

227

## 228 **Model-based analyses**

229 Our model-based analyses were all conducted using the Markov k-states (Mk) model (Lewis  
230 2001). This model assumes that characters are in one of  $k$  states, are all independent of each other,  
231 and change stochastically along branches with equal rates for all possible transitions, with all  
232 changes being independent of each other (as a Markov process). Some of these assumptions have  
233 been criticized for being unrealistic when applied to morphological change (Lewis 2001; Wright et  
234 al. 2014). For example, the model is fully symmetrical; i.e., the probability of change from 0 to 1 is  
235 equal to the probability of change from 1 to 0, an assumption that is violated by Dollo characters  
236 (i.e., losses of complex structures that are unlikely to be regained). Even though some of these  
237 assumptions can be theoretically relaxed, and implementations of these relaxed models already  
238 exist in a Bayesian framework (Wright et al. 2014), we used the standard version of the model to  
239 simplify the analyses and allow a closer comparison with the maximum likelihood implementation.

240

## 241 **Maximum likelihood (ML)**

242 Maximum likelihood analyses were conducted using RaxML v. 8.2.10 (Stamatakis 2014).  
243 Matrices were modified by recoding all ambiguities (e.g., 0/1 in a three-state character) as missing  
244 data, since the method cannot cope with ambiguous characters. Topology is inferred using branch  
245 lengths, which are estimated as the expected number of state changes per character on that  
246 particular branch. We conducted 1000 bootstrap replicates with a gamma-distributed rate variation,

247 which models different rates across characters by employing a multiplier drawn from a discretized  
248 gamma distribution.

249

## 250 **Bayesian inference (BI)**

251 Bayesian analyses relied on MrBayes v. 3.2.3 (Ronquist et al. 2012), under the Mk model.

252 For each matrix, we conducted two analyses, one with an equal rate of evolution among characters  
253 and another with gamma-distributed rate variation. In both cases, we used the  $MK_{pr-inf}$  correction for  
254 parsimony informative characters. The analyses were run for 5,000,000 generations, sampling every  
255 1000<sup>th</sup> generation. The first 10,000 runs were discarded as burn-in. Posterior traces were inspected  
256 using Tracer (Rambaut and Drummond 2007).

257

## 258 **Model testing and rate variation**

259 We also conducted stepping stone analyses (Xie et al. 2011; Ronquist et al. 2012) in order to  
260 evaluate the most appropriate model of rate variation among characters (equal rates vs. gamma-  
261 distributed rates). These analyses allow us to estimate the marginal likelihood for different models  
262 with better accuracy than other measures (e.g., harmonic mean estimator). We used 4 independent  
263 runs with 2 chains with the default MrBayes parameters, run for 5,000,000 generations and  
264 sampling every 1000<sup>th</sup> generation. Using the marginal likelihoods from the stepping stone analysis,  
265 we then calculated the support for the two models using Bayes factors (BF) (Kass and Raftery  
266 1995).

267

## 268 **Exploring conflict in the data**

269 To explore phylogenetic conflict in the data, we employed the software SplitsTree 4 (Huson  
270 and Bryant 2006). We used this program to visualize conflicts among the bootstrap replicates from  
271 the MP and ML analysis and among the posterior tree samples found with Bayesian inference. The

272 software summarizes the sets of trees using split networks, which allow us to visualize all possible  
273 conflicting hypotheses. These diagrams should not be confused with networks derived from  
274 distance-based neighbor-joining analyses. A consensus network (Holland et al. 2004) was built  
275 using the “count” option, with the cut-off for visualizing the splits set at 0.05.  
276

## 277 **Long branch attraction tests**

278 We modified the matrices to perform tests for long branch attraction (LBA), following the  
279 suggestions of Bergsten (2005). Two matrices were created to test the potentially destabilizing  
280 effect of the two long-branched groups suspected to create this artifact, angiosperms and Gnetales,  
281 by alternately removing each of them (long branch extraction analysis, LBE). If the association of  
282 angiosperms and Gnetales is indeed a result of LBA, then the removal of one of them should  
283 significantly alter the placement of the other. To test further the hypothesis of an LBA artifact  
284 exerted by angiosperms, we followed a similar approach to the sampling experiment in Rota-  
285 Stabelli et al. (2010): another matrix was created to elongate the branch subtending angiosperms by  
286 removing the three fossil taxa most commonly identified as angiosperm outgroups (*Pentoxylon*,  
287 *Bennettitales*, and *Caytonia*) (branch elongation analysis, BE). In the presence of a long branch  
288 attraction artifact, the support for the node including the two long branches (angiosperms and  
289 Gnetales) should increase with such an “elongation” of one of the two branches. To test the effect of  
290 including fossil data in the matrices, we created a set of matrices in which all fossil taxa were  
291 removed (extant experiment, EX). Because this should lead to elongation of the branches  
292 subtending the living groups, this situation should result in the worst possible condition for long  
293 branch artifacts, and thus lead to the strongest apparent support for the node including the two long  
294 branches.

## 295 **Morphospace analysis**

296 To visualize morphological patterns in the different matrices, we conducted principal  
297 coordinates (PCO) analyses. We employed the maximum observed rescaled distance  
298 between all pairs of taxa to generate the ordination as obtained using the MorphDistMatrix  
299 function of the R package Claddis (Lloyd 2016). PCO analysis was conducted using the  
300 ‘cmdscale’ function from the stats package (R Core Team 2017). The taxa were then plotted  
301 on the first two PCO axes.

302

## 303 **Data availability**

304

305 All data are available on figshare: <https://figshare.com/s/9a4fc5d4accff8e62084>.

306

## 307 **RESULTS**

308

309 Our re-analyses of the historical morphological matrices of seed plants with parsimony  
310 resulted in trees identical to the published trees (Table 1). The MP trees and the consensus trees  
311 always show a gnetangiosperm clade (with or without *Caytonia*), with the exception of trees based  
312 on the Doyle (2008) matrix, in which gnetangiosperm and gneconifer topologies are equally  
313 parsimonious. Constraining Gnetales and conifers to form a clade always results in trees longer than  
314 the most parsimonious trees, except with the Doyle (2008) matrix (Table 2). The Templeton test of  
315 the best trees against the worst constrained trees (i.e., the most parsimonious constrained tree that is  
316 statistically most different from the most parsimonious unconstrained tree) does however show that  
317 this difference is only significant at the 0.05 level with the Nixon et al. (1994) matrix.

318 Bootstrap analysis shows that the gnetangiosperm clade is not strongly supported by any of  
319 the matrices, with the exception of the Nixon et al. (1994) matrix (Fig. 2). In the MP bootstrap

320 analysis of the post-2000 matrices (Fig. 2A), support for a gnetangiosperm topology appears to be  
321 lower than support for a gneconifer topology in all matrices except that of Rothwell et al. (2009).  
322 The ML bootstrap (Fig. 2B) shows higher support for a gneconifer topology than the MP bootstrap  
323 in all post-2000 analyses, as well as in the two pre-2000 Doyle and Donoghue (1986, 1992)  
324 matrices. In the post-2000 matrices, the support for gneconifers is always higher than the support  
325 for gnetangiosperms.

326 Our Bayes factor analysis using the marginal likelihood from the stepping stone runs shows  
327 strong support for rate variation among characters in all matrices except those of Crane (1985a) and  
328 Doyle and Donoghue (1986) (Table 3), as indicated by ln-Bayes factors higher than 2.

329 The trees obtained from the Bayesian analyses show a much sharper differentiation between  
330 early and late matrices, as shown by the trends in support values for gnetangiosperm and gneconifer  
331 arrangements in Fig. 2C. With the pre-2000 matrices, support and topology are mostly in agreement  
332 with the MP analyses. However, with the post-2000 matrices we observe a shift in support from the  
333 gnetangiosperms to a clade of Gnetales and conifers. This is illustrated by a split network consensus  
334 based on the Rothwell and Stockey (2016) matrix (Fig. 3C), in which Gnetales are linked with  
335 conifers, and *Glossopteris*, *Caytonia*, and *Petriellaea* (a Triassic fossil not included in earlier  
336 analyses that is now better known vegetatively thanks to work of Bomfleur et al. 2014) are the  
337 closest outgroups of angiosperms.

338 Our first test of the hypothesis that the gnetangiosperm topology is the result of long branch  
339 attraction consists of long branch extraction (LBE) experiments (Fig. 4A,B). These involved  
340 separate removal of the two potential long branch taxa: angiosperms and Gnetales.

341 The removal of the angiosperms has different effects on the pre- and post-2000 matrices.  
342 With the Crane (1985a) version two matrix analyzed here, a topology with Bennettitales,  
343 *Pentoxylon* and the Gnetales diverging after *Lyginopteris* and before the other taxa becomes as  
344 parsimonious as the topology with the gnetangiosperms nested among Mesozoic seed ferns that was

345 retrieved with the full matrix. The new tree corresponds to the most parsimonious tree that Crane  
346 (1985a) found with his version one matrix, which differed in that Bennettitales and *Pentoxylon* were  
347 scored as not having cupules potentially homologous with those of Mesozoic seed ferns. With the  
348 Doyle and Donoghue (1986) matrix, Bennettitales, *Pentoxylon*, and Gnetales are nested within  
349 coniferophytes. With the Doyle and Donoghue (1992) and Rothwell and Serbet (1994) matrices, the  
350 consensus tree is identical to the trimmed consensus derived from the full matrix. With the Nixon et  
351 al. (1994) matrix, *Cordaites* and *Ginkgo* are successive outgroups to a conifer plus gnetangiosperm  
352 clade, whereas with the full matrix they are equally parsimoniously placed as successive outgroups  
353 to the conifers, in a clade that is sister to gnetangiosperms. The inverse happens with the Doyle  
354 (1996) matrix, where the position of *Ginkgo* and cordaites is destabilized by the removal of the  
355 angiosperms, with these taxa being either successive outgroups to extant and fossil conifers or sister  
356 to a clade composed of other former gnetangiosperms, conifers, *Peltaspermum*, and *Autunia*. The  
357 position of the Gnetales in a truncated gnetangiosperm clade (i.e., with Bennettitales and  
358 *Pentoxylon*) is maintained in all matrices.

359         With the post-2000 matrices, the effect of removal of the angiosperms is consistent among  
360 different matrices. With the Hilton and Bateman (2006) matrix, Gnetales are equally  
361 parsimoniously placed within the coniferophytes, within the coniferophytes as sister to the  
362 Bennettitales or in an antophyte clade as sister to the conifers. In the Doyle (2006) and Doyle (2008)  
363 datasets, the resulting trees see the Gnetales nested within the coniferophytes, with or without  
364 Bennettitales. With the Rothwell et al. (2009) matrix (Fig. 4D-F), a topology with a clade of  
365 Gnetales and conifers that excludes Bennettitales and *Pentoxylon* becomes most parsimonious (Fig.  
366 4E). With the Rothwell and Stockey (2016) matrix, Gnetales are sister to *Taxus* in a coniferophyte  
367 clade that also includes *Doylea*, an Early Cretaceous cone-like structure interpreted as consisting of  
368 seed-bearing cupules (Stockey and Rothwell 2009; Rothwell and Stockey 2016).

369         The removal of the Gnetales has no impact at all on trees based on the Crane (1985a), Doyle

370 and Donoghue (1986), and Doyle and Donoghue (1992) matrices, in which the topology is identical  
371 to the trimmed topology of the consensus in the full analysis. With the Nixon et al. (1994) matrix,  
372 the removal of the Gnetales results in trees in which coniferophytes form a clade (including *Ginkgo*  
373 and *Cordaites*), i.e., eliminating most parsimonious trees in which gnetangiosperms are linked with  
374 conifers. With the Rothwell and Serbet (1994) matrix, the removal of Gnetales results in a breakup  
375 of the *Caytonia-Glossopteris-corystosperm* clade, with the angiosperms still nested within the other  
376 gnetangiosperms. With the Doyle (1996) matrix, the only difference lies in the placement of the  
377 corystosperms, *Autunia*, and *Peltaspermum*, which are sister to a coniferophyte clade in the analysis  
378 without Gnetales.

379         With the post-2000 matrices, the removal of the Gnetales results in trees in which the  
380 remaining gnetangiosperms (which may or may not include *Caytonia*) form a clade outside the  
381 coniferophytes (e.g., Fig. 4F). With the Doyle (2006) and Doyle (2008) matrices, a clade including  
382 Cycadales, glossopterids, and remaining gnetangiosperms (including *Caytonia*) is sister to a clade  
383 of *Callistophyton*, *Peltaspermum*, *Autunia*, and corystosperms plus coniferophytes. The analysis of  
384 the Rothwell and Stockey (2016) matrix represents an exception, where the placement of the  
385 remaining gnetangiosperms is not affected by the removal of Gnetales. However, the removal of  
386 *Doylea* in addition to Gnetales results in a pattern similar to that found with the other post-2000  
387 matrices.

388         In the branch elongation (BE) experiment, where three fossils commonly associated with  
389 angiosperms (Bennettitales, *Pentoxylon*, *Caytonia*) were removed, we observed that MP bootstrap  
390 support for the angiosperm plus Gnetales clade increases in all matrices (Fig. 4G). This effect is  
391 even stronger in the extant (EX) experiment matrices, in which all fossil taxa were removed, where  
392 a split including angiosperms plus Gnetales is strongly supported by the MP bootstrap in all  
393 matrices.

394         Bayesian analysis (BI) of the BE and EX matrices shows a less linear pattern (Fig. 4H, I).



395 In the BE analyses, the signal for the gnetangiosperms decreases with the Doyle and Donoghue  
396 (1986, 1992) matrices, reaching less than 0.5 posterior probability (PP) in the analysis with gamma-  
397 distributed rate variation. With the Nixon et al. (1994), Rothwell and Serbet (1994), and Doyle  
398 (1996) matrices, the PP of the gnetangiosperms in the BE matrices is comparable to that from the  
399 full matrices. In the post-2000 BE matrices, BI support for the gnetangiosperms is almost null with  
400 the Hilton and Bateman (2006) and Doyle (2006) matrices (<0.07 PP) and increases with the Doyle  
401 (2008) and Rothwell et al. (2009) matrices analyzed using gamma-rate variation (0.55 and 0.51  
402 respectively) and with the Rothwell and Stockey (2016) matrix (0.23 for the equal-rate analysis,  
403 0.37 for the gamma analysis). The analyses of the EX matrices all show high to moderate support  
404 (1-0.75 PP) for the split containing angiosperms plus Gnetales. With the post-2000 matrices, the use  
405 of the gamma-distributed model recovers a higher PP for the gnetangiosperms.

406 The morphospace analyses (Fig. 5) provide a graphic confirmation of the morphological  
407 separation of both Gnetales and angiosperms from other seed plants and the perception that  
408 Gnetales share competing morphological similarities with both angiosperms and conifers. In the  
409 morphospace generated from most of the pre-2000 matrices, Gnetales lie closer to angiosperms  
410 (data not shown). With the Doyle (1996) matrix and the post-2000 matrices, the first PCO axis  
411 appears to separate angiosperm-like and non-angiosperm-like taxa, whereas the second axis seems  
412 to represent a tendency from a seed fern-like towards a conifer-like morphology. Gnetales are  
413 always placed closer to the conifers than to the angiosperms (Fig. 5). However, in all cases,  
414 Gnetales seem to have higher levels of “angiosperm-like” morphology than do conifers, represented  
415 by their rightward placement on the first PCO axis. This position on the first axis is shared by  
416 *Doylea* with the Rothwell and Stockey (2016) matrix. Between the analyses of the Doyle (1996)  
417 and Doyle (2008) matrices (Fig. 5A, B), there is a modest shift of Gnetales away from angiosperms  
418 and towards conifers.

419

## 420 **DISCUSSION**

421       The results of our analyses help to resolve some of the main issues regarding the  
422 phylogenetic signal for the gnetangiosperm clade in morphological matrices of seed plants. Our  
423 meta-analyses of published datasets (Fig. 2) show a two-step trend: first, changes in character  
424 sampling and analysis weakened support for the gnetangiosperm hypothesis, and second, the use of  
425 model-based methods shifted the balance in favor of a relationship between Gnetales and conifers,  
426 bringing the results in line with molecular data. The effect of changes in character analysis is seen  
427 in the switch in support between matrices compiled before the main molecular analyses of seed  
428 plant phylogeny (pre-2000) and afterwards: i.e., Doyle (2006) and Hilton and Bateman (2006).  
429 These two matrices, which both used Doyle (1996) as a starting point but were modified  
430 independently, with only limited discussion at later stages of the two projects, and made different  
431 choices regarding character coding, taxon sampling, and splitting of higher-level taxa, both show a  
432 very similar pattern. Under the MP criterion, a gnetangiosperm topology continued to be more  
433 parsimonious, but with reduced support. By contrast, ML and the Bayesian criterion positively  
434 favor a grouping of Gnetales and conifers. The matrices descended from Doyle (2006) (i.e., Doyle  
435 2008) and from Hilton and Bateman (2006) (i.e., Rothwell et al. 2009, 2016) exhibit a similar  
436 pattern, except that in Doyle (2008) gnetangiosperm and gneconifer trees were equally  
437 parsimonious. This phenomenon was already reported by Mathews et al. (2010), who reanalyzed  
438 the matrix of Doyle (2008) using BI.

439

### 440 **Critical character reassessment weakened the conflict between morphology and molecules**

441       Examination of the behavior of characters on gnetangiosperm and gneconifer trees  
442 illustrates how changes in character analysis made between the studies of Doyle (1996) and Doyle  
443 (2006, 2008) increased support for gneconifer trees. Some of these changes were the result of new

444 discoveries concerning the morphology of Gnetales and other taxa, others of critical reassessment  
445 of previous character definitions aimed at reducing bias in favor of the gnetangiosperm hypothesis.  
446 The shift of Gnetales away from angiosperms and towards conifers observed in the morphospace  
447 analyses based on the datasets of Doyle (1996) and Doyle (2008) (Fig. 5A, B) is presumably the  
448 result of these changes. Especially modifications of the latter sort illustrate general problems of  
449 analysis and definition of morphological characters, which can be far more difficult than is usually  
450 acknowledged. Because potentially homologous structures in different taxa differ to various degrees,  
451 there is often a tension between use of overly lax criteria for definition of states at the stage of  
452 primary homology assessment, which may mistake homoplasy for homology, and overly strict  
453 criteria, which may overlook real synapomorphies. Other problems can be caused by inclusion of  
454 distinct characters that are correlated for functional or developmental reasons and therefore  
455 overweight single transformations, or by decisions on whether to treat presence and absence of a  
456 structure and different forms of the structure as states of the same character or as separate characters,  
457 both of which can lead to artifacts.

458         Most changes of the first sort involved previously overlooked conifer-like features of  
459 Gnetales. For example, Doyle (2006) added a character for presence of a torus in the pit membranes  
460 of xylem elements in conifers and Gnetales, based on observations on Gnetales by Carlquist (1996)  
461 and studies of conifers by Bauch et al. (1972). Doyle (2006) also rescored Gnetales as having a  
462 tiered proembryo, as in conifers; two tiers of cells were illustrated by Martens (1971) and called  
463 “étages,” and by Singh (1978). This similarity may have been overlooked because of other  
464 differences related to elimination of a free-nuclear phase in the embryogenesis of Gnetales (Doyle  
465 2006). Both characters undergo one less step on gneconifer trees than on most gnetangiosperm trees  
466 (exceptions are some trees with major rearrangements elsewhere in seed plants). In male “flowers”  
467 of *Ephedra* and *Welwitschia*, microsynangia are borne in two lateral groups, which Doyle (1996)  
468 interpreted as reduced pinnate sporophylls. Because Bennettitales, *Caytonia*, and many “seed fern”  
469 outgroups have pinnately organized microsporophylls, this character favored a gnetangiosperm tree

19

470 by one step. However, developmental studies by Mundry and Stützel (2004) indicated that the two  
471 lateral structures are more likely branches (strobili) bearing three or four simple sporophylls. Based  
472 on these observations, Doyle (2008) rescored microsporophylls in Gnetales as simple and one-  
473 veined, as in conifers, and as a result the character favored the gneconifer topology by one or two  
474 steps.

475 Doyle (2006) also made changes based on improved data on a character expressing the  
476 position of the ovule or ovules on the sporophylls or “cupules” that bear them, which is not directly  
477 relevant to Gnetales but potentially useful for identification of gnetangiosperm outgroups. Ovules  
478 are on the abaxial surface of the sporophyll/cupule in corystosperms (Axsmith et al. 2000; Klavins  
479 et al. 2002), rather than on the adaxial surface in glossopterids (Taylor and Taylor 1992), probably  
480 *Caytonia*, and angiosperms (if the outer integument is a modified leaf or cupule: Doyle 2006, 2008;  
481 Kelley and Gasser 2009). Ovules are also adaxial in the cupules of *Petriellaea* (Taylor et al. 1994;  
482 Bomfleur et al. 2014), which was included in the analysis of Rothwell and Stockey (2016).

483 Other changes were the result of doubts concerning the homology of characters that  
484 supported the gnetangiosperm hypothesis, along lines suggested by Donoghue and Doyle (2000).  
485 For example, in the apical meristem character, Doyle (1996) contrasted the presence of a tunica (an  
486 outer layer that maintains its integrity by undergoing only anticlinal cell divisions, i.e.,  
487 perpendicular to the surface) of Gnetales, angiosperms, and Araucariaceae, vs. its absence in cycads,  
488 *Ginkgo*, and other conifers. This character undergoes two steps when Gnetales are linked with  
489 angiosperms (the state in fossils is unknown), three when Gnetales are linked with conifers.  
490 However, the tunica consists of one layer of cells in Gnetales, but two layers in angiosperms,  
491 suggesting that it may not be homologous in the two groups. To reduce bias in favor of homology of  
492 these two conditions, Doyle (2006) split presence of a tunica into two states. The resulting three-  
493 state character undergoes three steps with Gnetales in both positions. Redefinition of the megaspore  
494 membrane character involved a shift in the limit between states, from thick vs. reduced (thin or  
495 absent) to present vs. absent; the megaspore membrane is thin in Gnetales, but absent in  
20

496 angiosperms, *Caytonia*, and probably Bennettitales. In compressions of bennettitalean seeds  
497 prepared by oxidative maceration, Harris (1954) observed no megaspore membrane, but Wieland  
498 (1916) and Stockey and Rothwell (2003) reported a thin layer around the megagametophyte in  
499 permineralized seeds. However, as noted by Harris (1954), there is no evidence that this layer is a  
500 true megaspore membrane (i.e., consisting of exinous material). These changes in character  
501 definition do involve a subjective element and were doubtless influenced by knowledge of the  
502 molecular evidence for a relationship of Gnetales and conifers, but the new definitions represent a  
503 shift toward greater caution in evaluating the potential homology of similar but not identical  
504 structures.

505         The trends seen in Fig. 2 show that recognition of previously overlooked similarities  
506 between Gnetales and conifers and reconsideration of potentially convergent characters between  
507 angiosperms and Gnetales succeeded in strengthening a morphological signal associating Gnetales  
508 with conifers. This result clearly contradicts the view that morphology and molecules are in strong  
509 conflict with each other (Bateman et al. 2006; Rothwell et al. 2009) and validates arguments along  
510 these same lines that were advanced by Doyle (2006, 2008) on a parsimony basis. Indeed, in all  
511 post-2000 matrices a topology with Gnetales linked with conifers requires the addition of only a  
512 few steps to the length of gnetangiosperm trees: e.g., four in the case of Hilton and Bateman (2006)  
513 and one in Doyle (2006), and in Doyle (2008) both topologies became equally parsimonious. A  
514 tendency to focus on the MP consensus tree and lack of exploration of almost equally parsimonious  
515 alternatives may have tended to inflate the perceived conflict between molecules and morphology.  
516 Among analyses since 1994, bootstrap and/or decay values were reported by Doyle (1996, 2006,  
517 2008), Hilton and Bateman (2006), and Rothwell and Stockey (2016), but not by Nixon et al.  
518 (1994), Rothwell and Serbet (1994), and Rothwell et al. (2009). Our analyses show that the signal  
519 retrieved using MP is more correctly characterized as profoundly ambiguous.

520

521 **Contribution of model-based methods**

522 By contrast, maximum likelihood and especially Bayesian analyses of all post-2000 matrices  
523 converge on a similar result, unambiguously favoring placement of Gnetales in a coniferophyte  
524 clade that includes Ginkgoales, cordaites, and extant and extinct conifers. Stronger support is  
525 obtained in BI analyses in which gamma rate variation among sites is implemented in the model.  
526 With ML the difference in relative support for the two hypotheses appears smaller, but a gneconifer  
527 arrangement is consistently favored with all datasets. These results of model-based analyses of post-  
528 2000 morphological matrices have interesting implications regarding stem relatives of the  
529 angiosperms. Indeed, most post-2000 matrices are broadly congruent in attaching *Pentoxylon*,  
530 glossopterids, Bennettitales, and *Caytonia* to the stem lineage of the angiosperms. To these the  
531 analysis of Rothwell and Stockey (2016) adds the Triassic genus *Petriellaea* (Taylor et al. 1994;  
532 Bomfleur et al. 2014) (Fig. 3), which has simple reticulate laminar venation, as in *Caytonia*, and  
533 cupules containing adaxial ovules. This may be consistent with the view that these fossils shed light  
534 on evolution of the complex reticulate venation and bitegmic ovules of angiosperms (Doyle 2006,  
535 2008).

536 A cautionary note on the results of our Bayesian analyses is necessary. The differences  
537 between bootstrap support values in the MP and ML analyses and posterior probabilities in the BI  
538 analyses could be due to the very different nature of these support metrics. It has been shown that  
539 the relationship between character support and increase in PP is far from linear, and PP can easily  
540 sway results toward a hypothesis that is supported by only a few characters (Zander 2004). The  
541 strong PP support for groupings (like *Caytonia* or *Petriellea* plus angiosperms) that receive weak or  
542 non-existent support on a character basis (MP and ML bootstrap, Fig. 3A, B) could indicate either  
543 the ability of Bayesian inference to pick up a significant signal in an otherwise noisy background or  
544 the possibility that this method can be led astray by a few potentially unimportant characters.

545

#### 546 **The conflict between morphology and molecules is partially due to long branch attraction**

547 Our results also add new empirical evidence on debates concerning the strengths and

548 weaknesses of morphological data in reconstructing phylogenetic relationships, the phylogenetic  
549 importance of fossils, and the best methods to analyze morphological data (Wright and Hillis 2014;  
550 O'Reilly et al. 2016; Puttick et al. 2017a). A well-known cause of phylogenetic conflict is the  
551 presence of long branches in the tree, which can lead to LBA phenomena (Felsenstein 1978;  
552 Bergsten 2005). Analyses based on simulated matrices and real data have repeatedly shown that  
553 probabilistic, model-based approaches are more robust to LBA than parsimony (Swofford et al.  
554 2001; Brinkmann et al. 2005; and references therein). Long branch attraction is most commonly  
555 discussed as a confounding factor in molecular studies, as in the case of Gnetales-basal trees found  
556 with molecular data (Sanderson et al. 2000; Magallón and Sanderson 2002; Burleigh and Mathews  
557 2007), but here it is morphology that is potentially affected: the BI trees show that both  
558 angiosperms and Gnetales are situated on very long morphological branches, especially in the post-  
559 2000 matrices.

560       After following suggestions by Bergsten (2005) and other methodologies (Rota Stabelli et al.  
561 2011), we conclude that LBA is responsible at least in part for the continuing support for the  
562 gnetangiosperm clade in MP analyses of the post-2000 matrices. First, BI recovers a gneconifer  
563 topology with higher probability than a topology with Gnetales linked with angiosperms, thus  
564 favoring a topology that separates the long branches over a topology that unites them. Second, more  
565 complex and better-fitting models recover a higher posterior probability for the topology in which  
566 angiosperms and Gnetales are separated (Fig. 2C). Third, removing Gnetales or angiosperms results  
567 in a rearrangement of the MP topologies in which the other long branch “flies away” from its  
568 original position. Fourth, support for Gnetales plus angiosperms increases with decreased sampling  
569 of fossil taxa on the branch leading to the angiosperms, and still more with the removal of all fossils  
570 (Fig. 4G-I). It has been suggested that molecular analyses may be incorrect about the relationship of  
571 angiosperms and Gnetales because they ignore the great diversity of extinct seed plant taxa (e.g.,  
572 Rothwell et al. 2009). This reasoning seems to assume that addition of fossils would strengthen the  
573 gnetangiosperm hypothesis, but in fact our results indicate that the opposite is true.

574 To our knowledge, this represents the first reported case of LBA in a morphological analysis  
575 that is supported by multiple tests (Bergsten 2005), with much stronger support than in previously  
576 reported cases (Lockhart and Cameron 2001; Wiens and Hollingsworth 2000). These analyses also  
577 support the view that model-based methods can overcome the shortcomings of parsimony in such  
578 cases. It is also noteworthy that the impact of LBA can be easily visualized with the principal  
579 coordinates analysis (Fig. 5), where the presumed close relationship between Gnetales and conifers  
580 and the convergence of Gnetales with the angiosperms are effectively congruent with the positions  
581 of the three taxa in the plot of the first two PCO axes. This tool could represent an interesting option  
582 for exploring the structure of the data in future phylogenetic analyses.

583 Less intensive examination of our results suggests that there are fewer conflicts between  
584 relationships obtained with parsimony and model-based approaches in other parts of the seed plant  
585 tree, suggesting that MP is not necessarily misleading when long branch effects are lacking. Even  
586 when morphological parsimony analyses vary in the arrangement of extant seed plant lines, they are  
587 more consistent about relationships below the crown group, with “progymnosperms,”  
588 hydrasperman “seed ferns,” *Lyginopteris*, and medullosans diverging successively below the crown  
589 group, and our model-based trees show similar relationships. Another consistent result is the  
590 association of traditional coniferophyte groups, namely ginkgos, cordaites, and conifers, setting  
591 aside whether this clade also includes Gnetales or (in some morphological analyses)  
592 gnetangiosperms. Relationships among cycads and Permian and Mesozoic “seed ferns”  
593 (peltasperms, corystosperms, glossopterids, *Caytonia*) are more variable among parsimony analyses,  
594 possibly because of the smaller proportion of preserved characters in the fossils and/or the low  
595 number of changes on short internal branches between these lines. Assuming that molecular and  
596 model-based morphological results are correct, these considerations suggest that parsimony may  
597 perform well when branch lengths are moderate, and it would be unwarranted to reject results out of  
598 hand because they are based on parsimony.

599 The conclusion that similarities between angiosperms and Gnetales are the result of



600 convergence should not be difficult to accept, because many aspects of the morphology of Gnetales  
601 can be explained in terms of a Paleozoic conifer prototype (which had female branch systems with  
602 secondary short shoots bearing sterile and fertile appendages; cf. Rothwell and Stockey 2013).  
603 However, removal of Gnetales from the former gnetangiosperm clade introduces new problems,  
604 notably by implying that similarities in seed morphology and anatomy in Gnetales and Bennettitales  
605 emphasized by Friis et al. (2009) are also convergences. Some of these similarities have been  
606 questioned or reduced by subsequent studies of Bennettitales (Rothwell et al. 2009; Doyle 2012;  
607 Rothwell and Stockey 2013; Pott 2016), but others remain. These similarities could be homologous  
608 if Bennettitales and Gnetales formed a clade within conifers, but it is much less plausible to  
609 interpret Bennettitales as modified conifers, considering their cycad-like leaf morphology, wood  
610 anatomical features, and pinnate microsporophylls.

611

## 612 **CONCLUSIONS**

613         The main lesson of our analyses may be that, contrary to previous impressions,  
614 morphological data do not present a strong conflict with the results of molecular analyses regarding  
615 the position of angiosperms and Gnetales. This strongly suggests that morphology carries a  
616 phylogenetic signal that is consistent with molecular data, and may therefore be useful in  
617 reconstructing other aspects of the phylogenetic history of the seed plants, most notably the position  
618 of fossils relative to living taxa. The supposed conflict between the two sorts of data on the major  
619 aspect of the phylogeny of seed plants emphasized here seems to be due to a combination of  
620 difficult problems in character analysis and limitations of phylogenetic methods. Since data from  
621 the fossil record are particularly important for resolving the evolutionary history of seed plants,  
622 because of the wide gaps that separate extant groups and the potential biases in analysis of such  
623 sparsely sampled taxa (Burleigh and Mathews 2007; Mathews 2009; Rothwell et al. 2009;  
624 Magallón et al. 2013), our results give new hope for the possibility of integrating fossils and  
625 molecules in a coherent way. This is even more important in light of new fossil discoveries (e.g.,

626 Rothwell and Stockey 2013, 2016), some of which show similarities to fossils previously associated  
627 with angiosperms (e.g., the Triassic *Petriellaea* plant, which shares leaf and cupule features with  
628 *Caytonia*: Bomfleur et al. 2014).

629         The absence of deep convergence problems also opens the possibility of combining  
630 morphological and molecular datasets in a total-evidence analysis. Such an approach has been  
631 rarely employed in datasets with fossil and extant plants (Magallón 2010), but it has proven to be  
632 useful in resolving some controversial relationships (i.e, in the Cycadales: Coiro and Pott 2017).  
633 However, especially with the recent expansion in the amount of available molecular data, both  
634 marker selection and taxon choice would have to be carefully considered to set up a successful  
635 analysis. It is possible that the ever-increasing amount of sequence data used to infer phylogenetic  
636 relationships could swamp the signal present in the many fewer morphological characters, in which  
637 case the result would not differ from that found with use of a molecular backbone constraint tree.

638         An important general message that emerges from our study is the importance of including an  
639 exploration of the signal in all phylogenetic analyses involving morphology. The overreliance on  
640 single consensus trees, as discussed in Brown et al. (2017) and Puttick et al. (2017b), has been a  
641 major driver of the perceived conflict in seed plant phylogeny; another factor has been the lack of  
642 support statistics in many studies. Among methods of signal dissection, consensus networks and  
643 distance-based neighbor-nets (even if these suffer from the general shortcomings associated with  
644 distance-based methods) present promising avenues for the exploration of morphological datasets  
645 (Bryant and Moulton 2004) and have proven their power in understanding the history of different  
646 groups of fossil and extant taxa at different taxonomic scales (Denk and Grimm 2009; Bomfleur et  
647 al. 2017; Grimm 2017).

648         Although most phylogenetic analyses based on morphology are still conducted in a  
649 parsimony framework, some authors have already underlined the potential of model-based  
650 approaches in this field (Lee and Worthy 2012; Lee et al. 2014). Our analyses show that BI yields  
651 more robust results under different taxon sampling strategies, and although parsimony and BI

652 usually give congruent results, BI appears to be effective in correcting errors of parsimony analyses  
653 caused by long branch effects. Our study converges with previous work indicating that the use of  
654 model-based techniques could allow the successful integration of taxa with a high proportion of  
655 missing data (Wiens 2005; Wiens and Tiu 2012), which is a prime consideration when dealing with  
656 the paleobotanical record.

657

## 658 **SUPPLEMENTARY MATERIAL**

659 The supplementary material is available as an online appendix.

## 660 **ACKNOWLEDGMENTS**

661 MC acknowledges H. Peter Linder for his fundamental support to this work, and for important  
662 comments on this manuscript. We would like to thank Richard Bateman and Gar Rothwell for  
663 making their matrices available, and Omar Rota-Stabelli for useful discussions of long branch  
664 attraction. Guido Grimm is thanked for thorough comments on the manuscript and a detailed  
665 discussion of the use of phylogenetic networks in the analysis of morphological data. Tanja Stadler,  
666 Susanne Renner, Elisabeth Truernit, Gavin George, Frank Anderson, Erika Edwards, and two  
667 anonymous reviewers are gratefully acknowledged for comments on a previous version of this  
668 manuscript. Guy Atchison, Yanis Bouchenak-Khelladi, Merten Ehmig, Kevin Boyce, Catarina  
669 Rydin, and an anonymous reviewer are thanked for useful comments on the present version.

## 670 **REFERENCES**

671 Albert, V. A., A. Backlund, K. Bremer, M. W. Chase, J. R. Manhart, B. D. Mishler, and K. C. Nixon.  
672 1994. Functional constraints and *rbcL* evidence for land plant phylogeny. *Annals of the Missouri*  
673 *Botanical Garden* 81:534-567.

674 Axsmith, B. J., E. L. Taylor, T. N. Taylor, and N. R. Cuneo. 2000. New perspectives on the  
675 Mesozoic seed fern order *Corytospermales* based on attached organs from the Triassic of

- 676 Antarctica. *American Journal of Botany* 87:757-768.
- 677 Bateman, R. M., J. Hilton, and P. J. Rudall. 2006. Morphological and molecular phylogenetic  
678 context of the angiosperms: contrasting the 'top-down' and 'bottom-up' approaches used to infer  
679 the likely characteristics of the first flowers. *Journal of Experimental Botany* 57:3471-503.
- 680 Bauch, J., W. Liese, and R. Schultze. 1972. The morphological variability of the bordered pit  
681 membranes in gymnosperms. *Wood Science and Technology* 6:165-184.
- 682 Bergsten, J. 2005. A review of long-branch attraction. *Cladistics* 21:163-193.
- 683 Bomfleur, B., A.-L. Decombeix, A. B. Schwendemann, I. H. Escapa, E. L. Taylor, T. N. Taylor, and  
684 S. McLoughlin. 2014. Habit and ecology of the Petriellales, an unusual group of seed plants  
685 from the Triassic of Gondwana. *International Journal of Plant Sciences* 175:1062-1075.
- 686 Bomfleur, B., G. W. Grimm, and S. McLoughlin. 2017. The fossil Osmundales (Royal Ferns)—a  
687 phylogenetic network analysis, revised taxonomy, and evolutionary classification of  
688 anatomically preserved trunks and rhizomes. *PeerJ*, 5, p.e3433.
- 689 Bowe, L. M., C. Coat, and C. W. dePamphilis. 2000. Phylogeny of seed plants based on all three  
690 genomic compartments: extant gymnosperms are monophyletic and Gnetales' closest relatives  
691 are conifers. *Proceedings of the National Academy of Sciences USA* 97:4092-4097.
- 692 Boyce, C. K. 2005. Patterns of segregation and convergence in the evolution of fern and seed plant  
693 leaf morphologies. *Paleobiology* 31:117–140.
- 694 Brinkmann, H., M. van der Giezen, Y. Zhou, G. P. de Raucourt, and H. Philippe. 2005. An empirical  
695 assessment of long-branch attraction artefacts in deep eukaryotic phylogenomics. *Systematic  
696 Biology* 54:743-757.
- 697 Brown, J. W., C. Parins-Fukuchi, G. W. Stull, O. M. Vargas, and S. A. Smith. 2017. Bayesian and  
698 likelihood phylogenetic reconstructions of morphological traits are not discordant when taking  
699 uncertainty into consideration: a comment on Puttick et al. *Proceedings of the Royal Society of*

- 700 London B. 284:2017.0986.
- 701 Bryant, D., and V. Moulton. 2004. Neighbor-net: an agglomerative method for the construction of  
702 phylogenetic networks. *Molecular Biology and Evolution* 21:255-265.
- 703 Burleigh, J. G., and S. Mathews. 2007. Assessing systematic error in the inference of seed plant  
704 phylogeny. *International Journal of Plant Sciences* 168:125-135.
- 705 Cantino, P. D., J. A. Doyle, S. W. Graham, W. S. Judd, R. G. Olmstead, D. E. Soltis, P. S. Soltis, and  
706 M. J. Donoghue. 2007. Towards a phylogenetic nomenclature of *Tracheophyta*. *Taxon* 56:822-  
707 846.
- 708 Carlquist, S. 1996. Wood, bark, and stem anatomy of Gnetales: a summary. *International Journal of*  
709 *Plant Sciences* 157(6 Suppl.):S58-S76.
- 710 Cau, A., T. Brougham, and D. Naish. 2015. The phylogenetic affinities of the bizarre Late  
711 Cretaceous Romanian theropod *Balaur bondoc* (Dinosauria, Maniraptora): dromaeosaurid or  
712 flightless bird? *PeerJ* 3:e1032.
- 713 Chaw, S.-M., C. L. Parkinson, Y. Cheng, T. M. Vincent, and J. D. Palmer. 2000. Seed plant  
714 phylogeny inferred from all three plant genomes: monophyly of extant gymnosperms and origin  
715 of Gnetales from conifers. *Proceedings of the National Academy of Sciences USA* 97:4086-4091.
- 716 Coiro, M., and C. Pott. 2017. *Eobowenia* gen. nov. from the Early Cretaceous of Patagonia:  
717 indication for an early divergence of *Bowenia*? *BMC Evolutionary Biology* 17(1), 97.
- 718 Cox, C. J., B. Li, P. G. Foster, T. M. Embley, and P. Civián. 2014. Conflicting phylogenies for early  
719 land plants are caused by composition biases among synonymous substitutions. *Systematic*  
720 *Biology* 63:272-279.
- 721 Crane, P. R. 1985a. Phylogenetic analysis of seed plants and the origin of angiosperms. *Annals of*  
722 *the Missouri Botanical Garden* 72:716-793.

- 723 Crane, P. R. 1985b. Phylogenetic relationships in seed plants. *Cladistics* 1:329-348.
- 724 Crepet, W. L., and D. W. Stevenson. 2010. The Bennettitales (Cycadeoidales): a preliminary  
725 perspective on this arguably enigmatic group. Pp. 215-244 in C. T. Gee, ed. *Plants in Mesozoic*  
726 *time, morphological innovations, phylogeny, ecosystems*. Indiana University Press, Bloomington.
- 727 Dembo, M., D. Radovčić, H. M. Garvin, M. F. Laird, L. Schroeder, J. E. Scott, J. Brophy, R. R.  
728 Ackermann, C. M. Musiba, D. J. de Ruiter, and A. Ø.Mooers. 2016. The evolutionary  
729 relationships and age of *Homo naledi*: An assessment using dated Bayesian phylogenetic  
730 methods. *Journal of Human Evolution* 97:17-26.
- 731 Denk, T. and G.W. Grimm. 2009. The biogeographic history of beech trees. Review of  
732 *Palaeobotany and Palynology* 158:83–100.
- 733 Donoghue, M. J., and J. A. Doyle. 2000. Seed plant phylogeny: demise of the anthophyte  
734 hypothesis? *Current Biology* 10:R106-R109.
- 735 Donoghue, M. J., J. A. Doyle, J. Gauthier, A. G. Kluge, and T. Rowe. 1989. The importance of  
736 fossils in phylogeny reconstruction. *Annual Review of Ecology and Systematics* 20:431-460.
- 737 Doyle, J. A. 1996. Seed plant phylogeny and the relationships of the Gnetales. *International Journal*  
738 *of Plant Sciences* 157(6, Suppl.):S3-S39.
- 739 Doyle, J. A. 2006. Seed ferns and the origin of the angiosperms. *Journal of the Torrey Botanical*  
740 *Society* 133:169-209.
- 741 Doyle, J. A. 2008. Integrating molecular phylogenetic and paleobotanical evidence on origin of the  
742 flower. *International Journal of Plant Sciences* 169:816-843.
- 743 Doyle, J. A. 2012. Molecular and fossil evidence on the origin of angiosperms. *Annual Review of*  
744 *Earth and Planetary Sciences* 40:301-326.
- 745 Doyle, J. A. 2013. Phylogenetic analyses and morphological innovations in land plants. In B. A.

- 746 Ambrose and M. Purugganan, eds. The evolution of plant form. Annual Plant Reviews 45:1-50.  
747 Wiley-Blackwell, Oxford.
- 748 Doyle, J. A., and M. J. Donoghue. 1986. Seed plant phylogeny and the origin of angiosperms: an  
749 experimental cladistic approach. Botanical Review 52:321-431.
- 750 Doyle, J. A., and M. J. Donoghue. 1987. The importance of fossils in elucidating seed plant  
751 phylogeny and macroevolution. Review of Palaeobotany and Palynology 50:63-95.
- 752 Doyle, J. A., and M. J. Donoghue. 1992. Fossils and seed plant phylogeny revisited. Brittonia  
753 44:89-106.
- 754 Doyle, J. A., and P. K. Endress. 2000. Morphological phylogenetic analysis of basal angiosperms:  
755 comparison and combination with molecular data. International Journal of Plant Sciences  
756 161(Suppl.):S121-S153.
- 757 Endress, P. K., and J. A. Doyle. 2009. Reconstructing the ancestral angiosperm flower and its initial  
758 specializations. American Journal of Botany 96:22-66.
- 759 Felsenstein, J. 1978. Cases in which parsimony or compatibility methods will be positively  
760 misleading. Systematic Zoology 27:401-410.
- 761 Foley, N. M., M. S. Springer, and E. C. Teeling. 2016. Mammal madness: is the mammal tree of life  
762 not yet resolved? Philosophical Transactions of the Royal Society of London B 371:2015.0140.
- 763 Friis, E. M., P. R. Crane, K. R. Pedersen, S. Bengtson, P. J. C. Donoghue, G. W. Grimm, and M.  
764 Stampanoni. 2007. Phase-contrast X-ray microtomography links Cretaceous seeds with Gnetales  
765 and Bennettitales. Nature 450:549-552.
- 766 Friis, E. M., J. A. Doyle, P. K. Endress, and Q. Leng. 2003. *Archaeofructus* – angiosperm precursor  
767 or specialized early angiosperm? Trends in Plant Science 8:369-373.
- 768 Friis, E. M., K. R. Pedersen, and P. R. Crane. 2009. Early Cretaceous mesofossils from Portugal and

- 769 eastern North America related to the Bennettitales-Erdtmanithecals-Gnetales group. *American*  
770 *Journal of Botany* 96:252-283.
- 771 Gauthier, J., A. G. Kluge, and T. Rowe. 1988. Amniote phylogeny and the importance of fossils.  
772 *Cladistics* 4:105-209.
- 773 Gauthier, J., M. Kearney, J. A. Maisano, O. Rieppel, and A. D. B. Behlke. 2012. Assembling the  
774 squamate tree of life: perspectives from the phenotype and the fossil record. *Bulletin of the*  
775 *Peabody Museum of Natural History* 53:3–308.
- 776 Givnish, T. J., and K. J. Sytsma, eds. 1997. *Molecular evolution and adaptive radiation*. Cambridge  
777 University Press, Cambridge, UK.
- 778 Godefroit, P., A. Cau, D.-Y. Hu, F. Escuillié, W. Wu, and G. Dyke. 2013. A Jurassic avialan  
779 dinosaur from China resolves the early phylogenetic history of birds. *Nature* 498:359-362.
- 780 Grimm, G. 2017. Should we try to infer trees on tree-unlikely matrices?  
781 <http://phylonetworks.blogspot.ch/>
- 782 Gugerli, F., C. Sperisen, U. Biihler, I. Brunner, S. Brodbeck, J. D. Palmer, and Y.-L. Qiu. 2001.  
783 The evolutionary split of Pinaceae from other conifers: evidence from an intron loss and a  
784 multigene phylogeny. *Molecular Phylogenetics and Evolution* 21:167-175.
- 785 Hamby, R.K., and E. A. Zimmer. 1992. Ribosomal RNA as a phylogenetic tool in plant systematics.  
786 Pp. 50-91 in P. S. Soltis, D. E. Soltis, and J. J. Doyle, eds. *Molecular Systematics of Plants*.  
787 Chapman and Hall, New York.
- 788 Harris, T. M. 1954. Mesozoic seed cuticles. *Svensk Botanisk Tidskrift* 48:281-291.
- 789 Hill, C.R., and P. R. Crane. 1982. Evolutionary cladistics and the origin of angiosperms. In K. A.  
790 Joysey, and A. E. Friday, eds. *Problems of phylogenetic reconstruction*. Systematics Association  
791 Special Volume 21:269-361. Academic Press, London.



- 792 Hilton, J., and R. M. Bateman. 2006. Pteridosperms are the backbone of seed plant phylogeny.  
793 *Journal of the Torrey Botanical Society* 133:119-168.
- 794 Holland, B., K. T. Huber, V. Moulton, and P. J. Lockhart. 2004. Using consensus networks to visualize  
795 contradictory evidence for species phylogeny. *Molecular Biology and Evolution* 21:1459–1461.
- 796 Huson, D.H., and D. Bryant. 2006. Application of phylogenetic networks in evolutionary studies.  
797 *Molecular Biology and Evolution* 23:254-267.
- 798 Jenner, R. A. 2004. Accepting partnership by submission? Morphological phylogenetics in a  
799 molecular millennium. *Systematic Biology* 53:333-359.
- 800 Kass, R. E., and A. E. Raftery. 1995. Bayes factors. *Journal of the American Statistical Association*  
801 90:773-795.
- 802 Kelley, D. R., and C. S. Gasser. 2009. Ovule development: genetic trends and evolutionary  
803 considerations. *Sexual Plant Reproduction* 22:229-234.
- 804 Klavins, S. D., T. N. Taylor, and E. L. Taylor. 2002. Anatomy of *Umkomasia* (Corytospermales)  
805 from the Triassic of Antarctica. *American Journal of Botany* 89:664-676.
- 806 Lee, M. S., and A. Palci. 2015. Morphological phylogenetics in the genomic age. *Current Biology*  
807 25:R922-R929.
- 808 Lee, M. S., and T. H. Worthy. 2012. Likelihood reinstates *Archaeopteryx* as a primitive bird.  
809 *Biology Letters* 8:299-303.
- 810 Legg, D. A., M. D. Sutton, and G. D. Edgecombe. 2013. Arthropod fossil data increase congruence  
811 of morphological and molecular phylogenies. *Nature Communications* 4:2485.
- 812 Lewis, P. O. 2001. A likelihood approach to estimating phylogeny from discrete morphological  
813 character data. *Systematic Biology* 50:913-925.
- 814 Lloyd, G. T. 2016. Estimating morphological diversity and tempo with discrete character-taxon

- 815 matrices: implementation, challenges, progress, and future directions. *Biological Journal of the*  
816 *Linnean Society* 118:131-151.
- 817 Lockhart, P. J., and S. A. Cameron. 2001. Trees for bees. *Trends in Ecology & Evolution* 16:84-88.
- 818 Maddison, D. R., and W. P. Maddison. 2003. *MacClade 4: analysis of phylogeny and character*  
819 *evolution, version 4.06*. Sinauer Associates, Sunderland, MA.
- 820 Magallón, S., and M. J. Sanderson. 2002. Relationships among seed plants inferred from highly  
821 conserved genes: sorting conflicting phylogenetic signals among ancient lineages. *American*  
822 *Journal of Botany* 89:1991-2006.
- 823 Magallón, S., K. W. Hilu, and D. Quandt. 2013. Land plant evolutionary timeline: gene effects are  
824 secondary to fossil constraints in relaxed clock estimation of age and substitution rates.  
825 *American Journal of Botany* 100:556-573.
- 826 Martens, P. 1971. *Les Gnétophytes*. *Encyclopedia of Plant Anatomy*, 12(2). Borntraeger, Stuttgart.
- 827 Mathews, S. 2009. Phylogenetic relationships among seed plants: persistent questions and the limits  
828 of molecular data. *American Journal of Botany* 96:228-236.
- 829 Mathews, S., M. D. Clements, and M. A. Beilstein. 2010. A duplicate gene rooting of seed plants  
830 and the phylogenetic position of flowering plants. *Philosophical Transactions of the Royal*  
831 *Society of London B* 365:383-395.
- 832 Mathews, S., and E. Kramer. 2012. The evolution of reproductive structures in seed plants: a re-  
833 examination based on insights from developmental genetics. *New Phytologist* 194:910-923.
- 834 Müller, K. F. 2005. The efficiency of different search strategies for estimating parsimony, jackknife,  
835 bootstrap, and Bremer support. *BMC Evolutionary Biology* 2005;5:58.
- 836 Mundry, M., and T. Stützel. 2004. Morphogenesis of the reproductive shoots of *Welwitschia*  
837 *mirabilis* and *Ephedra distachya* (Gnetales), and its evolutionary implications. *Organisms*

- 838 Diversity & Evolution 4:91-108.
- 839 Nickrent, D. L., C. L. Parkinson, J. D. Palmer, and R. J. Duff. 2000. Multigene phylogeny of land  
840 plants with special reference to bryophytes and the earliest land plants. *Molecular Biology and*  
841 *Evolution* 17:1885-1895.
- 842 Nixon, K. C., W. L. Crepet, D. W. Stevenson, and E. M. Friis. 1994. A reevaluation of seed plant  
843 phylogeny. *Annals of the Missouri Botanical Garden* 81:484-533.
- 844 O'Leary, M. A., J. I. Bloch, J. J. Flynn, T. J. Gaudin, A. Giallombardo, N. P. Giannini, S. L.  
845 Goldberg, B. P. Kraatz, Z.-X. Luo, J. Meng, X. Ni, M. J. Novacek, F. A. Perini, Z. S. Randall, G.  
846 W. Rougier, E. J. Sargis, M. T. Silcox, N. B. Simmons, M. Spaulding, P. M. Velazco, M. Weksler,  
847 J. R. Wible, and A. L. Cirranello. 2013. The placental mammal ancestor and the post-K-Pg  
848 radiation of placentals. *Science* 339:662-667.
- 849 O'Reilly, J. E., M. N. Puttick, L. Parry, A. R. Tanner, J. E. Tarver, J. Fleming, D. Pisani, and P. C. J.  
850 Donoghue. 2016. Bayesian methods outperform parsimony but at the expense of precision in the  
851 estimation of phylogeny from discrete morphological data. *Biology Letters* 12:2016.0081.
- 852 Parenti, L. R. 1980. A phylogenetic analysis of the land plants. *Biological Journal of the Linnean*  
853 *Society* 13:225-242.
- 854 Patterson, C. 1981. Significance of fossils in determining evolutionary relationships. *Annual*  
855 *Review of Ecology and Systematics* 12:195-223.
- 856 Pott, C. 2016. *Westersheimia pramelreuthensis* from the Carnian (Upper Triassic) of Lunz, Austria:  
857 more evidence for a unitegmic seed coat in early Bennettitales. *International Journal of Plant*  
858 *Sciences* 177:771-791.
- 859 Puttick, M. N., J. E. O'Reilly, A. R. Tanner, J. F. Fleming, J. Clark, L. Holloway, J. Lozano-  
860 Fernandez, L. A. Parry, J. E. Tarver, D. Pisani, and P. C. J. Donoghue. 2017a. Uncertain-tree:  
861 discriminating among competing approaches to the phylogenetic analysis of phenotype data.

- 862 Proceedings of the Royal Society of London B 284:2016.2290.
- 863 Puttick, M. N., J. E. O'Reilly, D. Oakley, A. R. Tanner, J. F. Fleming, J. Clark, L. Holloway, J.
- 864 Lozano-Fernandez, L. A. Parry, J. E. Tarver, D. Pisani, P. C. J. Donoghue. 2017b. Parsimony and
- 865 maximum-likelihood phylogenetic analyses of morphology do not generally integrate
- 866 uncertainty in inferring evolutionary history: a response to Brown et al. Proceedings of the Royal
- 867 Society of London B. 284:2017.1636.
- 868 Pyron, R. A. 2011. Divergence time estimation using fossils as terminal taxa and the origins of
- 869 Lissamphibia. *Systematic Biology* 60:466-481.
- 870 Pyron, R. A. 2015. Post-molecular systematics and the future of phylogenetics. *Trends in Ecology*
- 871 & *Evolution* 30:384-389.
- 872 Qiu, Y.-L., L. Li, B. Wang, Z. Chen, O. Dombrowska, J. Lee, L. Kent, L. Li, R. W. Jobson, T. A.
- 873 Hendry, D. W. Taylor, C. M. Testa, and M. Ambros. 2007. A nonflowering land plant phylogeny
- 874 inferred from nucleotide sequences of seven chloroplast, mitochondrial, and nuclear genes.
- 875 *International Journal of Plant Sciences* 168:691-708.
- 876 R Core Team. 2017. R: A language and environment for statistical computing. R Foundation for
- 877 Statistical Computing, Vienna, Austria. URL <https://www.R-project.org/>.
- 878 Rambaut, A., and A. J. Drummond. 2007. Tracer: MCMC trace analysis tool, v1.4.1. Available at:
- 879 <http://tree.bio.ed.ac.uk/software>.
- 880 Ronquist, F., S. Klopfstein, L. Vilhelmsen, S. Schulmeister, D. L. Murray, and A. P. Rasnitsyn. 2012.
- 881 A total-evidence approach to dating with fossils, applied to the early radiation of the
- 882 Hymenoptera. *Systematic Biology* 61:973-999.
- 883 Rota-Stabelli, O., E. Kayal, D. Gleeson, J. Daub, J. L. Boore, M. J. Telford, D. Pisani, M. Blaxter,
- 884 and D. V. Lavrov. 2010. Ecdysozoan mitogenomics: evidence for a common origin of the legged
- 885 invertebrates, the Panarthropoda. *Genome Biology and Evolution* 2:425-440.

- 886 Rothwell, G. W., W. L. Crepet, and R. A. Stockey. 2009. Is the anthophyte hypothesis alive and well?  
887 New evidence from the reproductive structures of Bennettitales. *American Journal of Botany*  
888 96:296-322.
- 889 Rothwell, G. W., and R. Serbet. 1994. Lignophyte phylogeny and the evolution of spermatophytes:  
890 a numerical cladistic analysis. *Systematic Botany* 19:443-482.
- 891 Rothwell, G. W., and R. A. Stockey. 2013. Evolution and phylogeny of Gnetophytes: evidence from  
892 the anatomically preserved seed cone *Protoephedrites eamesii* gen. et sp. nov. and the seeds of  
893 several bennettitalean species. *International Journal of Plant Sciences* 174:511-529.
- 894 Rothwell, G. W., and R. A. Stockey. 2016. Phylogenetic diversification of Early Cretaceous seed  
895 plants: the compound seed cone of *Doylea tetrahedrasperma*. *American Journal of Botany*  
896 103:923-937.
- 897 Rudall, P. J., and R. M. Bateman. 2010. Defining the limits of flowers: the challenge of  
898 distinguishing between the evolutionary products of simple versus compound strobili.  
899 *Philosophical Transactions of the Royal Society of London B* 365:397-409.
- 900 Rydin, C., and M. Källersjö. 2002. Taxon sampling and seed plant phylogeny. *Cladistics* 18:484-  
901 513.
- 902 Rydin, C., and M. Källersjö, and E. M. Friis E.M. 2002. Seed plant relationships and the systematic  
903 position of Gnetales based on nuclear and chloroplast DNA: conflicting data, rooting problems,  
904 and the monophyly of conifers. *International Journal of Plant Sciences* 163:197-214.
- 905 Sanderson, M. J., M. F. Wojciechowski, J.-M. Hu, T. Sher Khan, and S. G. Brady. 2000. Error, bias,  
906 and long-branch attraction in data for two chloroplast photosystem genes in seed plants.  
907 *Molecular Biology and Evolution* 17:782-797.
- 908 Scotland, R. W., R. G. Olmstead, and J. R. Bennett. 2003. Phylogeny reconstruction: the role of  
909 morphology. *Systematic Biology* 52:539-548.

- 910 Singh, H. 1978. Embryology of gymnosperms. Handbuch der Pflanzenanatomie 10(2). Borntraeger,  
911 Berlin.
- 912 Springer, M. S., A. Burk-Herrick, R. Meredith, E. Eizirik, E. Teeling, S. J. O'Brien, and W. J.  
913 Murphy. 2007. The adequacy of morphology for reconstructing the early history of placental  
914 mammals. Systematic Biology 56:673-684.
- 915 Springer, M. S., R. W. Meredith, E. C. Teeling, and W. J. Murphy. 2013. Technical comment on  
916 “The placental mammal ancestor and the post-K-Pg radiation of placentals”. Science 341:613.
- 917 A. Stamatakis. 2014. RAxML version 8: a tool for phylogenetic analysis and post-analysis of large  
918 phylogenies. Bioinformatics 30:1312-1313.
- 919 Stefanovic, S., M. Jager, J. Deutsch, J. Broutin, and M. Masselot. 1998. Phylogenetic relationships  
920 of conifers inferred from partial 28S rRNA gene sequences. American Journal of Botany 85:688-  
921 697.
- 922 Stockey, R. A., and G. W. Rothwell. 2003. Anatomically preserved *Williamsonia*  
923 (Williamsoniaceae): evidence for bennettitalean reproduction in the Late Cretaceous of western  
924 North America. International Journal of Plant Sciences 164:251-262.
- 925 Stockey, R. A., and G. W. Rothwell. 2009. Distinguishing angiosperms from the earliest  
926 angiosperms: A Lower Cretaceous (Valanginian-Hauterivian) fruit-like reproductive structure.  
927 American Journal of Botany 96:323-335.
- 928 Sun, G., Q. Ji, D. L. Dilcher, S. Zheng, K. C. Nixon, and X. Wang. 2002. Archaeofractaceae, a new  
929 basal angiosperm family. Science 296:899-904.
- 930 Swofford, D. L. 2003. PAUP\*. Phylogenetic Analysis Using Parsimony (\* and other methods),  
931 version 4. Sunderland: Sinauer Associates.
- 932 Swofford, D. L., P. J. Waddell, J. P. Huelsenbeck, P. G. Foster, P. O. Lewis, and J. S. Rogers. 2001.  
933 Bias in phylogenetic estimation and its relevance to the choice between parsimony and

- 934 likelihood methods. *Systematic Biology* 50:525–539.
- 935 Taylor, E. L., and T. N. Taylor. 1992. Reproductive biology of the Permian Glossopteridales and  
936 their suggested relationship to flowering plants. *Proceedings of the National Academy of*  
937 *Sciences USA* 89:11495-11497.
- 938 Taylor, T. N., G. M. Del Fueyo, and E. L. Taylor. 1994. Permineralized seed fern cupules from the  
939 Triassic of Antarctica: implications for cupule and carpel evolution. *American Journal of Botany*  
940 81:666-677.
- 941 Templeton, A. R. 1983. Phylogenetic inference from restriction endonuclease cleavage site maps  
942 with particular reference to the evolution of humans and the apes. *Evolution* 37:221-244.
- 943 Wickett, N. J., S. Mirarab, N. Nguyen, T. Warnow, E. Carpenter, N. Matasci, S. Ayyampalayam, M.  
944 S. Barker, J. G. Burleigh, M. A. Gitzendanner, B. R. Ruhfel, E. Wafula, J. P. Der, S. W. Graham,  
945 S. Mathews, M. Melkonian, D. E. Soltis, P. S. Soltis, N. W. Miles, C. J. Rothfels, L. Pokorny, A.  
946 J. Shaw, L. DeGironimo, D. W. Stevenson, B. Surek, J. C. Villarreal, B. Roure, H. Philippe, C. W.  
947 dePamphilis, T. Chen, M. K. Deyholos, R. S. Baucom, T. M. Kutchan, M. M. Augustin, J. Wang,  
948 Y. Zhang, Z. Tian, Z. Yan, X. Wu, X. Sun, G. K. S. Wong, and J. Leebens-Mack. 2014.  
949 Phylotranscriptomic analysis of the origin and early diversification of land plants. *Proceedings of*  
950 *the National Academy of Sciences USA* 111:E4859–E4868.
- 951 Wieland, G. R. 1916. American fossil cycads. Vol. 2. Taxonomy. Carnegie Institution of Washington,  
952 Washington, D.C.
- 953 Wiens, J. J., P. T. Chippindale, and D. M. Hillis. 2003. When are phylogenetic analyses misled by  
954 convergence? A case study in Texas cave salamanders. *Systematic Biology* 52:501-514.
- 955 Wiens, J. J. 2005. Can incomplete taxa rescue phylogenetic analyses from long-branch attraction?  
956 *Systematic Biology* 54:731-742.
- 957 Wiens, J. J., and B. D. Hollingsworth. 2000. War of the iguanas: conflicting phylogenies, long-

- 958 branch attraction, and disparate rates of molecular and morphological evolution in iguanid  
959 lizards. *Systematic Biology* 49:69-85.
- 960 Wiens, J. J., and J. Tiu. 2012. Highly incomplete taxa can rescue phylogenetic analyses from the  
961 negative impacts of limited taxon sampling. *PloS One* 7:e42925.
- 962 Wright, A. M., D. M. Hillis. 2014. Bayesian analysis using a simple likelihood model outperforms  
963 parsimony for estimation of phylogeny from discrete morphological data. *PLoS One* 9:e109210.
- 964 Wright, A. M., G. T. Lloyd, and D. M. Hillis. 2015. Modeling character change heterogeneity in  
965 phylogenetic analyses of morphology through the use of priors. *Systematic Biology* 65:602-611.
- 966 Xie, W., P. O. Lewis, Y. Fan, L. Kuo, and M.-H. Chen. 2011. Improving marginal likelihood  
967 estimation for Bayesian phylogenetic model selection. *Systematic Biology* 60:150-160.
- 968 Zander, R. H. 2004. Minimal values of reliability of bootstrap and jackknife proportions, Decay  
969 Index, and Bayesian posterior probability. *PhyloInformatics* 2:1-13.
- 970 Zhang, C., T. Stadler, S. Klopstein, T. A. Heath, and F. Ronquist. 2016. Total-evidence dating under  
971 the fossilized birth–death process. *Systematic Biology* 65:228-249.
- 972 Zhong, B., O. Deusch, V. V. Goremkin, D. Penny, P. J. Briggs, R. A. Atherton, S. V. Nikiforova, and  
973 P. J. Lockhart. 2011. Systematic error in seed plant phylogenomics. *Genome Biology and*  
974 *Evolution* 3:1340-1348.
- 975 Zou, Z., and J. Zhang. 2016. Morphological and molecular convergences in mammalian  
976 phylogenetics. *Nature Communications* 7: 12758.
- 977
- 978 **Figure 1.** A, Relationships among extant seed plants. On the left an gnetangiosperm topology, and  
979 on the right a gneconifer topology. Relationships between Cycadales and *Ginkgo* vary among  
980 analyses of both sorts. B, Relationships among the matrices reanalyzed in this paper.
- 981 **Figure 2.** Support for the gnetangiosperms or gneconifers in the different matrices and using  
982 different methods. A, Results from the MP bootstrap analyses; B, results from the ML bootstrap



983 analyses; C, results from the BI analyses. The difference between the pre-2000 and post-2000  
984 matrices is clearly underlined by a shift in support from gnetangiosperms to gneconifers in the  
985 ML and BI analyses, and a drop in support for the gnetangiosperms in the MP analyses.

986 **Figure 3.** Split network consensus of A, the posterior tree sample of the MP bootstrap analysis, B,  
987 the ML bootstrap analysis, and C, the BI analysis of the Rothwell and Stockey (2016) matrix  
988 using gamma-distributed rate variation. Only splits with more than 0.15 PP or 15% bootstrap are  
989 shown, and support is shown only for splits with more than 0.20 PP or 20% bootstrap. The  
990 support values for the splits within the angiosperms have been removed for clarity. If the  
991 Gnetales-conifer clade is present and supported with all three methods, other relationships (i.e.,  
992 *Caytonia* in a clade with angiosperms) are only supported in the BI analysis.

993 **Figure 4.** A-C, Scheme of the long branch attraction tests; A and B represent the long branch  
994 extraction experiment, C represents the branch elongation experiment. Null hypotheses are in the  
995 right upper corner. D-F, Results of the LBE experiment on the Rothwell et al. (2009) matrix. All  
996 trees are MP consensus trees. Fossil taxa diverging below the most recent common ancestor of  
997 extant seed plants removed for ease of comparison. D, Untrimmed matrix, showing an  
998 gnetangiosperm topology and paraphyletic conifers. E, Angiosperm removal matrix, showing  
999 Gnetales nested in the conifers and remaining gnetangiosperms removed from the coniferophyte  
1000 clade. F, Gnetales removal matrix, with monophyletic conifers nested in a large coniferophyte  
1001 clade. G-I, Results of the BE and EX experiments. G, Results of the MP analyses. H-I, Results of  
1002 the BI analyses under the Markov k-states (Mk) model with H, equal rates and I, gamma-  
1003 distributed rate variation.

1004 **Figure 5.** Plot of the first two principal coordinate axes for four of the matrices analyzed. The first  
1005 PCO axis mainly separates the angiosperms and the other seed plants, while the second PCO  
1006 axis separates more conifer-like and more fern-like groups. These plots illustrate the effect of the  
1007 reassessment of gnetalean characters between the two Doyle matrices (A, B), and the similar  
1008 structure of the data in the Hilton and Bateman (2006) (C) and Rothwell and Stockey (2016) (D)

1009 matrices.

1010

1011

1012

1013

1014

1015

1016

1017

1018

1019

1020

1021

1022

1023

1024

1025

1026

1027

1028

1029

1030

1031

1032

1033

1034

1035 1. Statistics for the parsimony analyses of fossil matrices.

|                                  | <i>Number of trees</i> | <i>Length</i> | <i>Ci</i> | <i>Ri</i> |
|----------------------------------|------------------------|---------------|-----------|-----------|
| <b>Crane 1985</b>                | 8                      | 50            | 0.600     | 0.730     |
| <b>Doyle and Donoghue 1986</b>   | 36                     | 123           | 0.504     | 0.674     |
| <b>Doyle and Donoghue 1992</b>   | 94                     | 112           | 0.545     | 0.658     |
| <b>Nixon et al. 1994</b>         | 225                    | 332           | 0.392     | 0.788     |
| <b>Rothwell and Serbet 1994</b>  | 8                      | 191           | 0.529     | 0.721     |
| <b>Doyle 1996</b>                | 123                    | 247           | 0.494     | 0.782     |
| <b>Hilton and Bateman 2006</b>   | 480                    | 313           | 0.457     | 0.801     |
| <b>Doyle 2006</b>                | 8                      | 321           | 0.514     | 0.753     |
| <b>Doyle 2008</b>                | 16                     | 346           | 0.503     | 0.744     |
| <b>Rothwell et al. 2009</b>      | 66                     | 330           | 0.503     | 0.776     |
| <b>Rothwell and Stockey 2016</b> | 6                      | 363           | 0.466     | 0.754     |

1036

1037

1038

1039

1040

1041

1042

1043

1044

1045

1046

1047

1048 **Table 2:** Results from the MP analysis of constrained gneconifer trees

|                                        | <i>Length<br/>uncons<br/>trained</i> | <i>Length<br/>Gnetales+Conif<br/>er</i> | <i>Length<br/>differenc<br/>e</i> | <i>Templeton Test p-value<br/>(best value)</i> |
|----------------------------------------|--------------------------------------|-----------------------------------------|-----------------------------------|------------------------------------------------|
| <b>Crane 1985</b>                      | 50                                   | 54                                      | 4                                 | 0.1573                                         |
| <b>Doyle and<br/>Donoghue<br/>1986</b> | 123                                  | 130                                     | 7                                 | 0.1266                                         |
| <b>Doyle and<br/>Donoghue<br/>1992</b> | 112                                  | 118                                     | 6                                 | 0.1088                                         |
| <b>Nixon et al.<br/>1994</b>           | 332                                  | 348                                     | 16                                | 0.0131*                                        |
| <b>Rothwell and<br/>Serbet 1994</b>    | 191                                  | 197                                     | 6                                 | 0.2252                                         |
| <b>Doyle 1996</b>                      | 247                                  | 257                                     | 10                                | 0.0679                                         |
| <b>Hilton and<br/>Bateman 2006</b>     | 313                                  | 317                                     | 4                                 | 0.4595                                         |
| <b>Doyle 2006</b>                      | 321                                  | 322                                     | 1                                 | 0.8474                                         |
| <b>Doyle 2008</b>                      | 346                                  | 346                                     | 0                                 | 0.9888                                         |
| <b>Rothwell et al.<br/>2009</b>        | 330                                  | 334                                     | 4                                 | 0.3458                                         |
| <b>Rothwell and<br/>Stockey 2016</b>   | 363                                  | 369                                     | 6                                 | 0.1336                                         |

1049

1050

1051

1052

1053 **Table 3.** Model-testing statistics for the Bayesian inference analyses.

|                                      | <i>Mk<sub>prinf</sub></i> | <i>Mk<sub>prinf</sub> + G</i> | <i>lnBF</i> | <i>2xlnBF</i> |
|--------------------------------------|---------------------------|-------------------------------|-------------|---------------|
| <b>Crane 1985</b>                    | -223.03                   | -223.01                       | 0.02        | 0.04          |
| <b>Doyle and Donoghue<br/>1986</b>   | -473.68                   | -473.70                       | -0.02       | -0.04         |
| <b>Doyle and Donoghue<br/>1992</b>   | -432.38                   | -431.00                       | 1.38        | 2.76          |
| <b>Rothwell and Serbet<br/>1994</b>  | -861.53                   | -854.14                       | 7.39        | 14.78         |
| <b>Nixon et al. 1994</b>             | -1555.76                  | -1538.27                      | 17.49       | 34.98         |
| <b>Doyle 2006</b>                    | -1383.60                  | -1365.27                      | 18.33       | 36.66         |
| <b>Hilton and Bateman<br/>2006</b>   | -1559.87                  | -1532.70                      | 27.17       | 54.34         |
| <b>Doyle 2008</b>                    | -1481.46                  | -1455.09                      | 26.37       | 52.74         |
| <b>Rothwell et al. 2009</b>          | -1541.68                  | -1527.09                      | 14.59       | 29.18         |
| <b>Rothwell and Stockey<br/>2016</b> | -1511.73                  | -1493.78                      | 17.95       | 35.90         |

1054

1055

1056

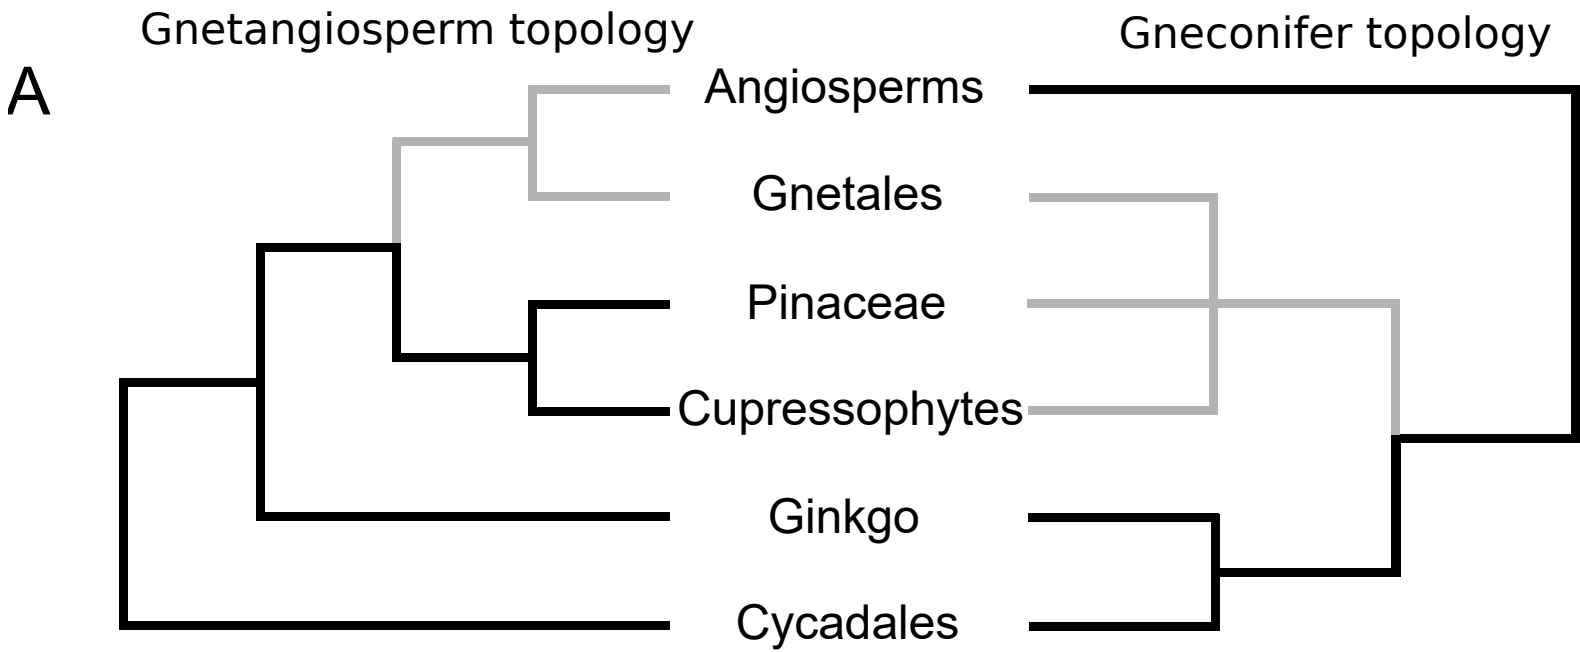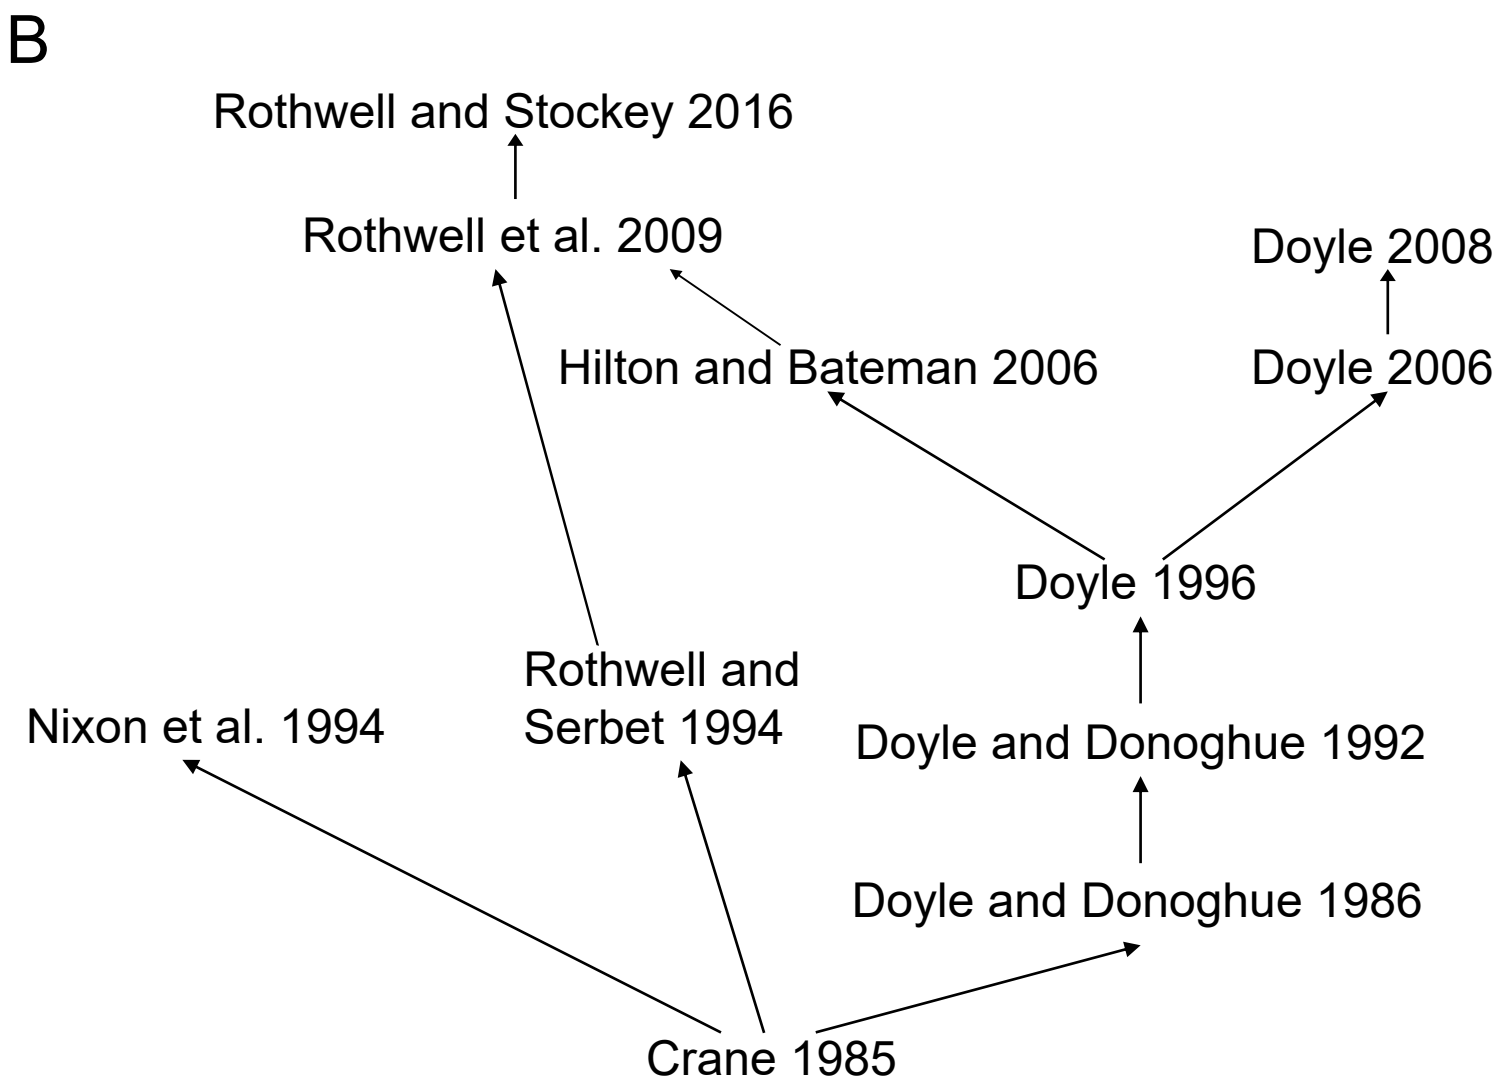

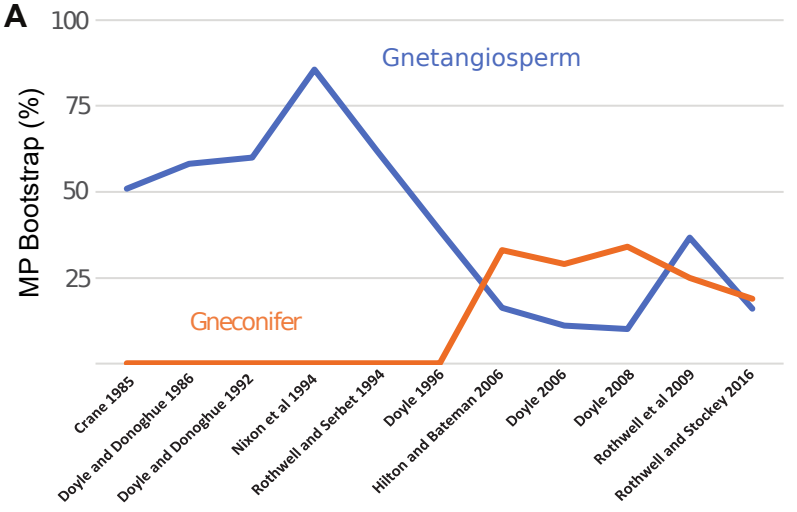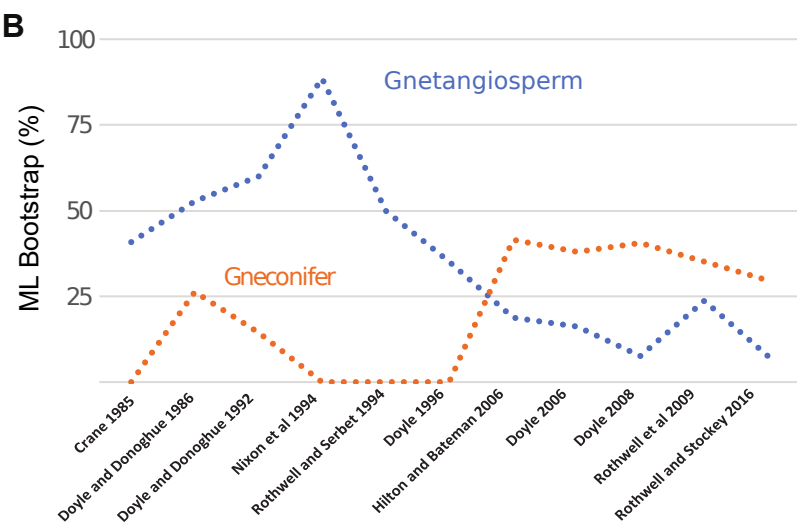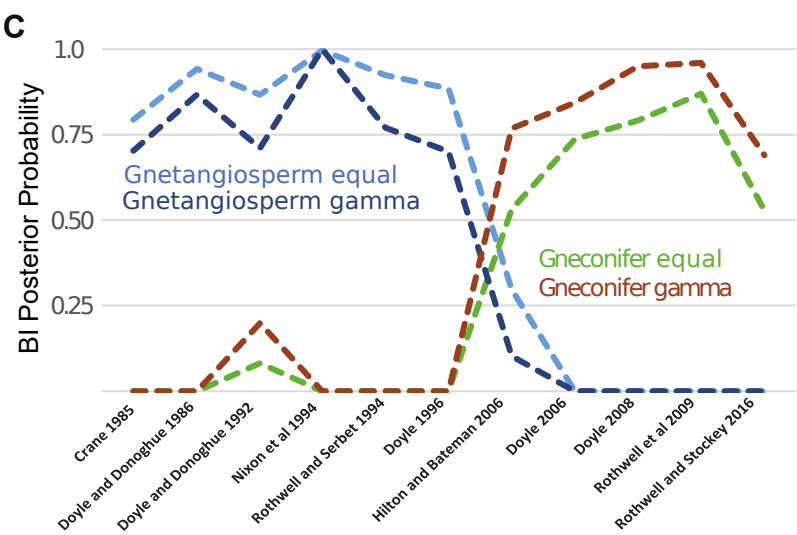

**A**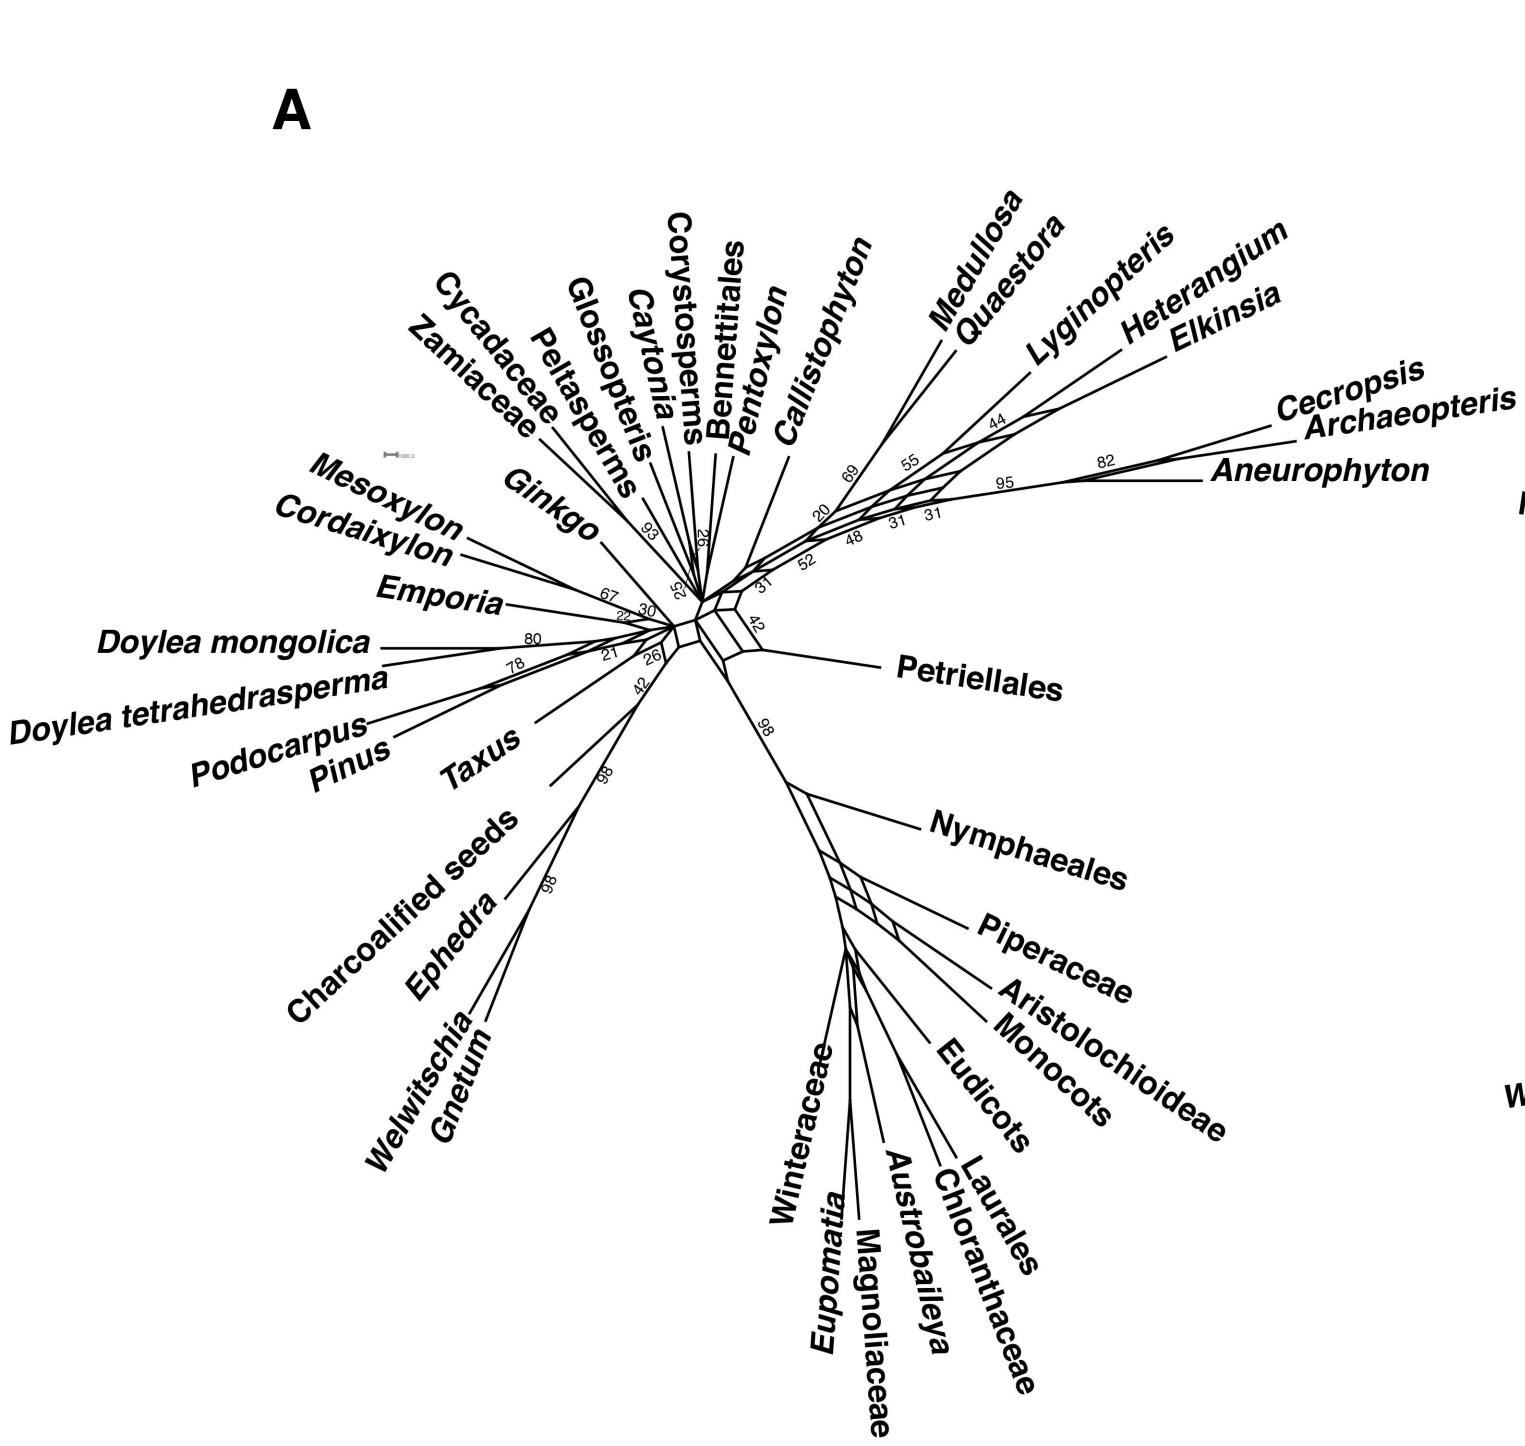**B**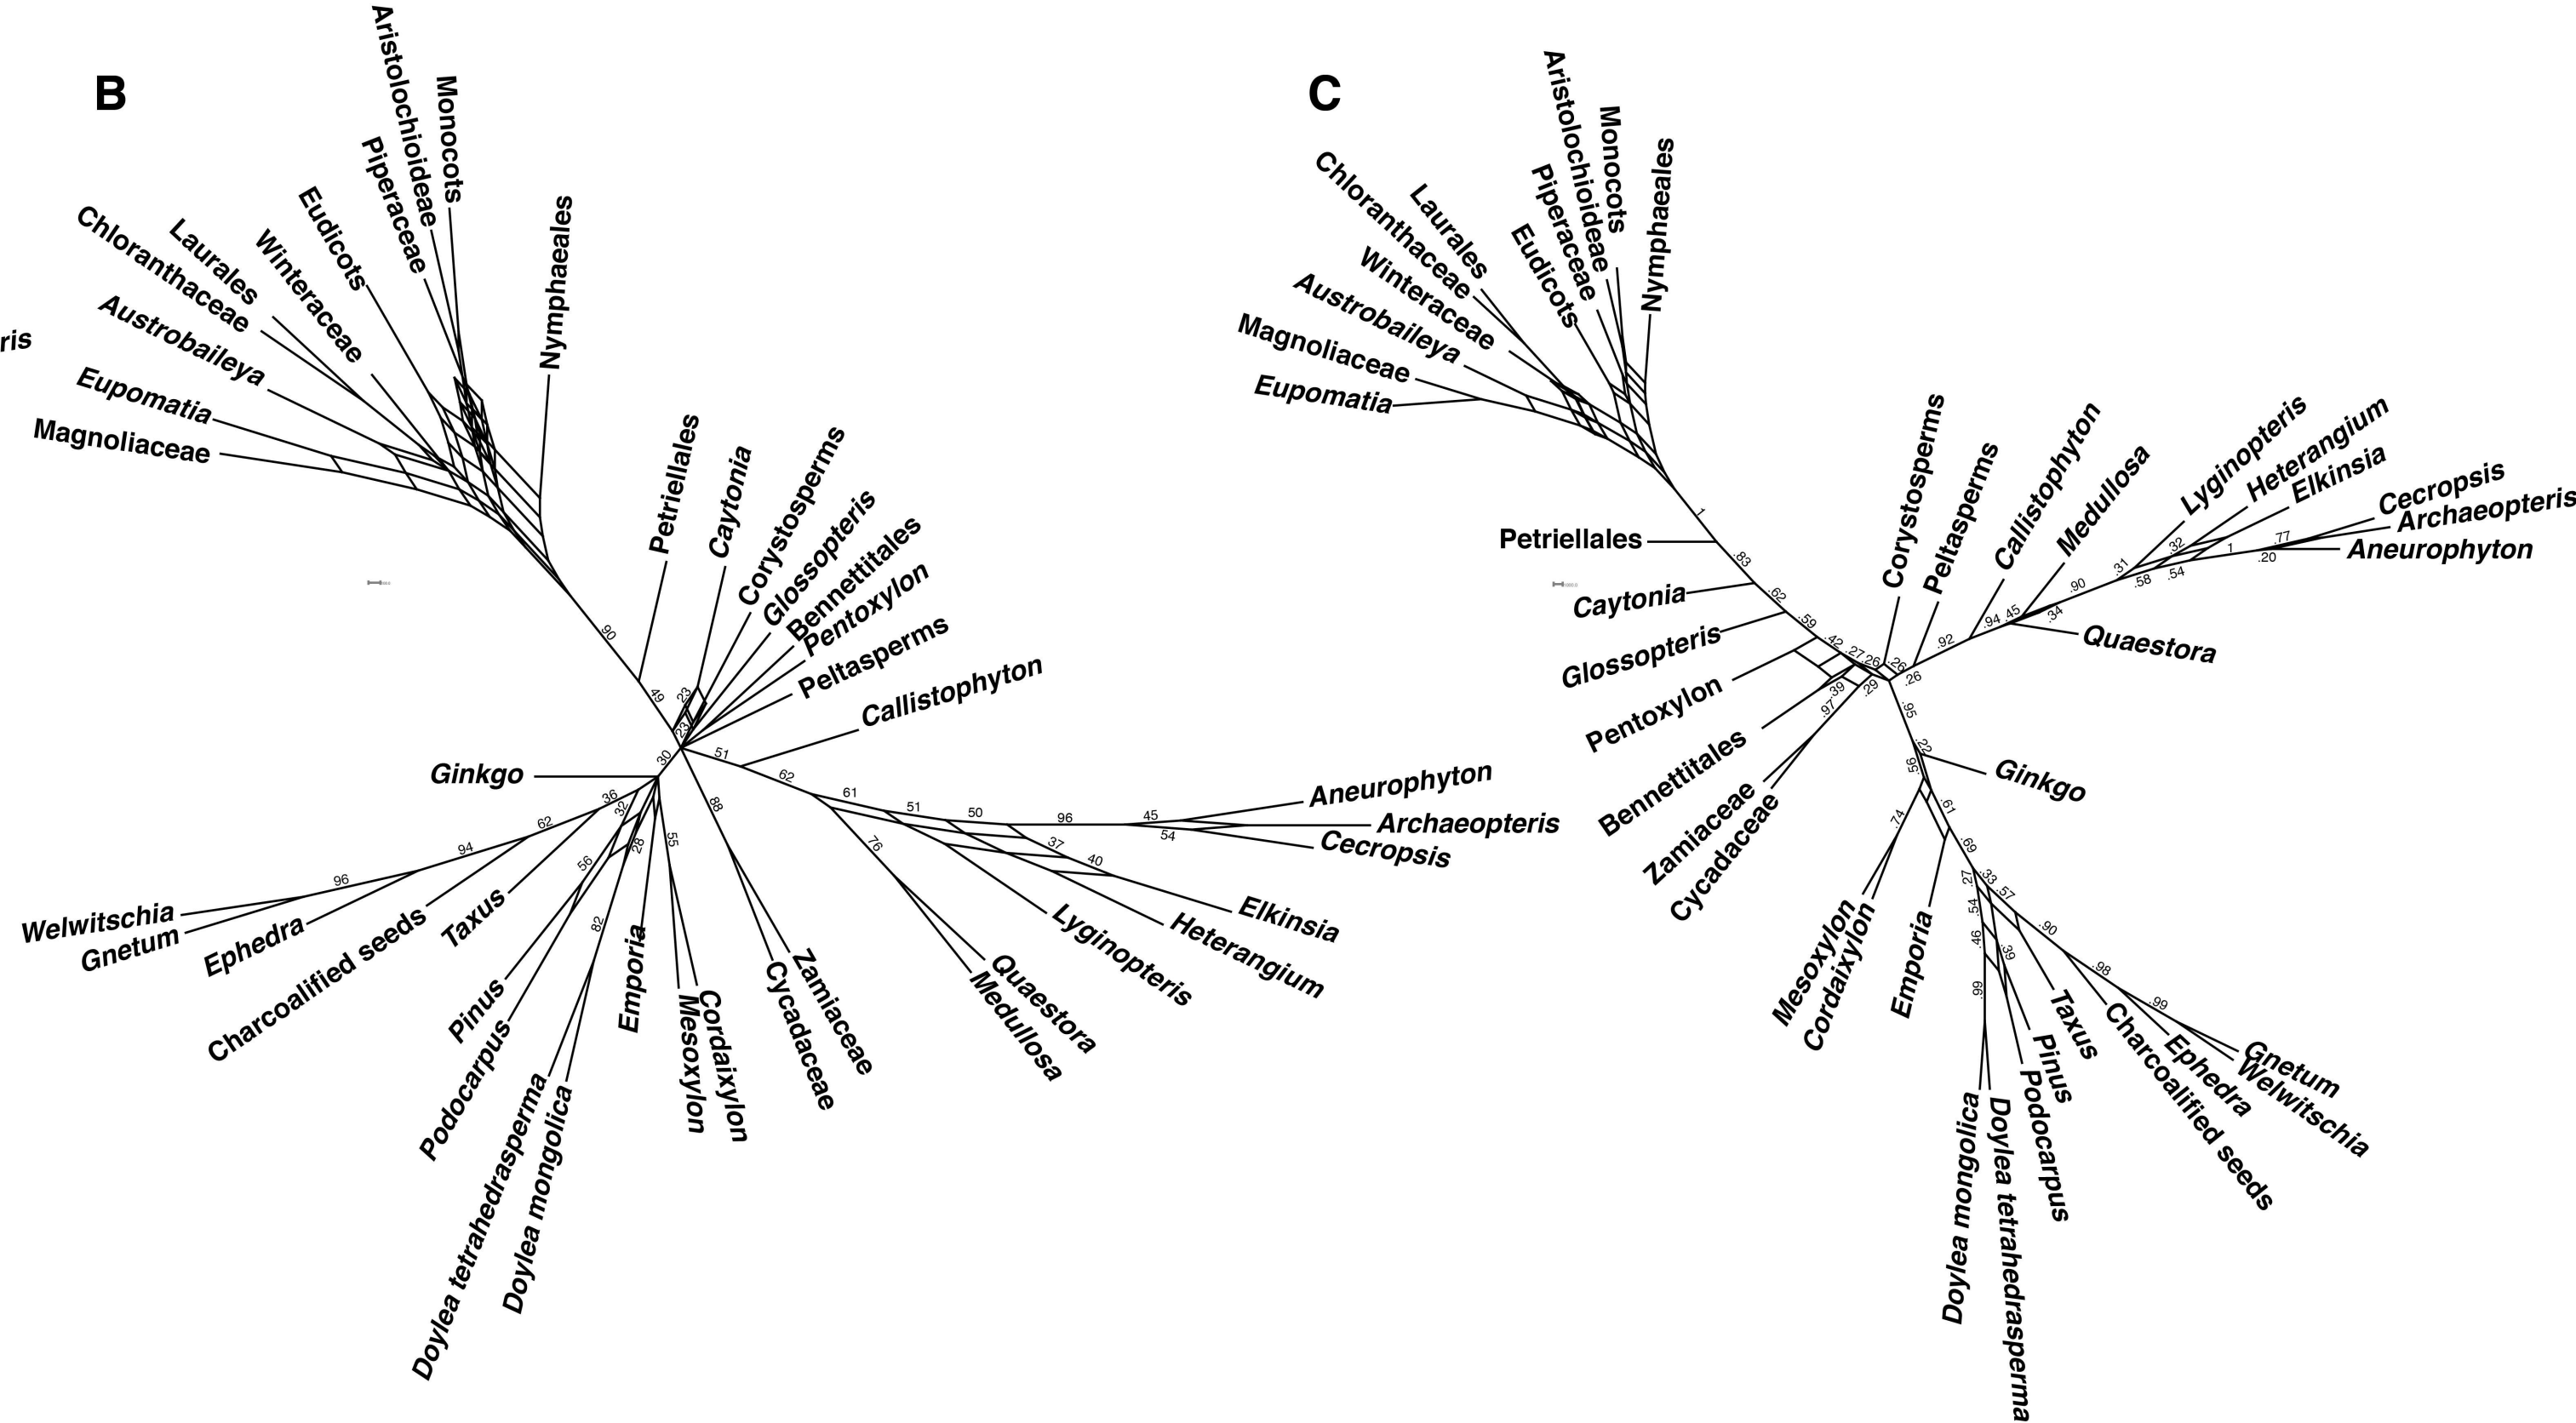**C**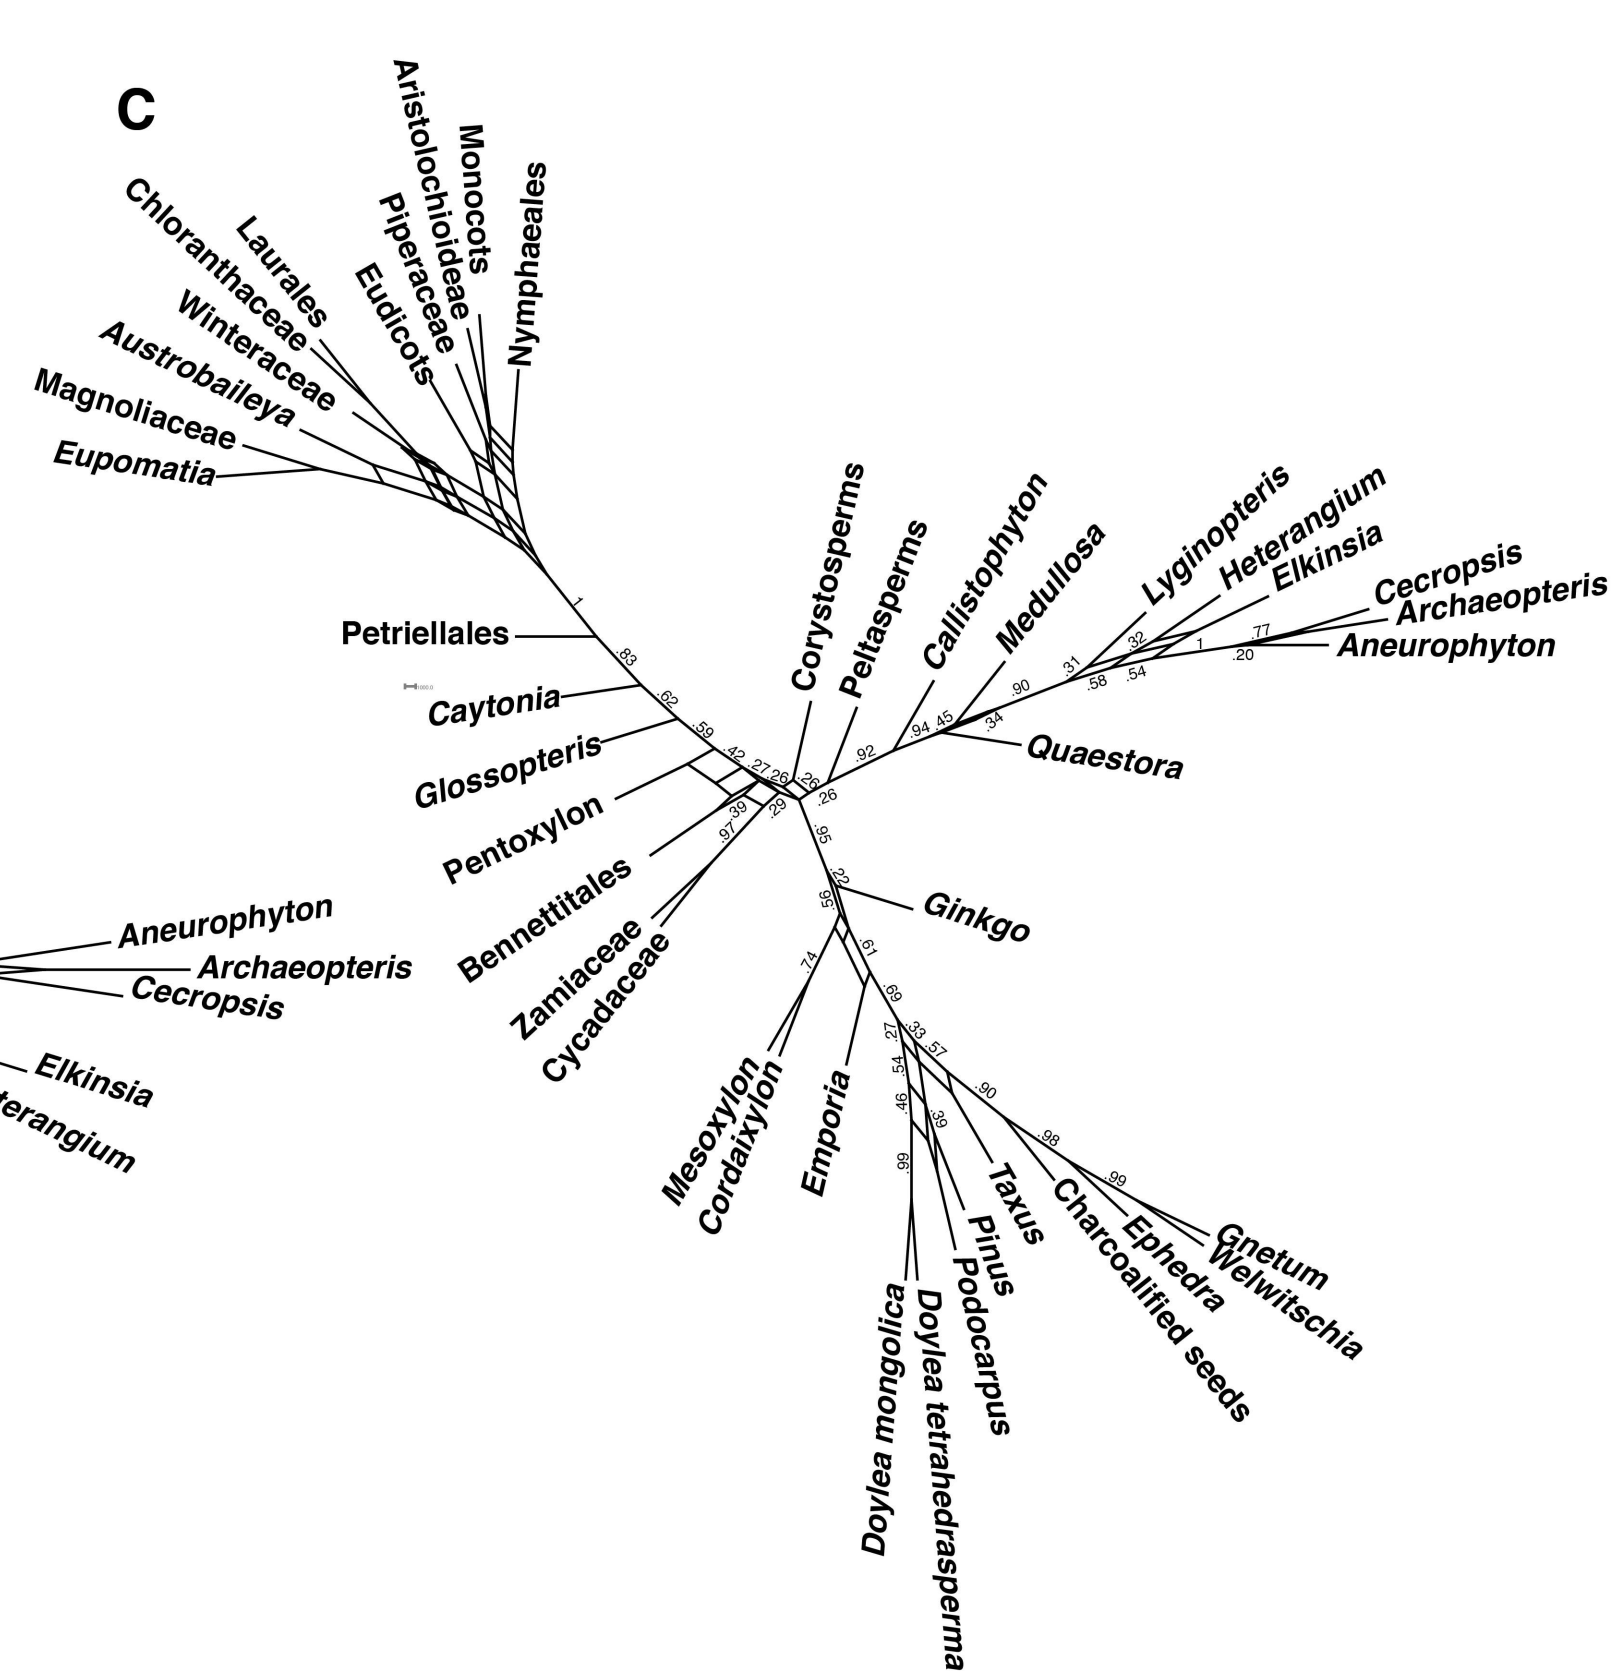



A

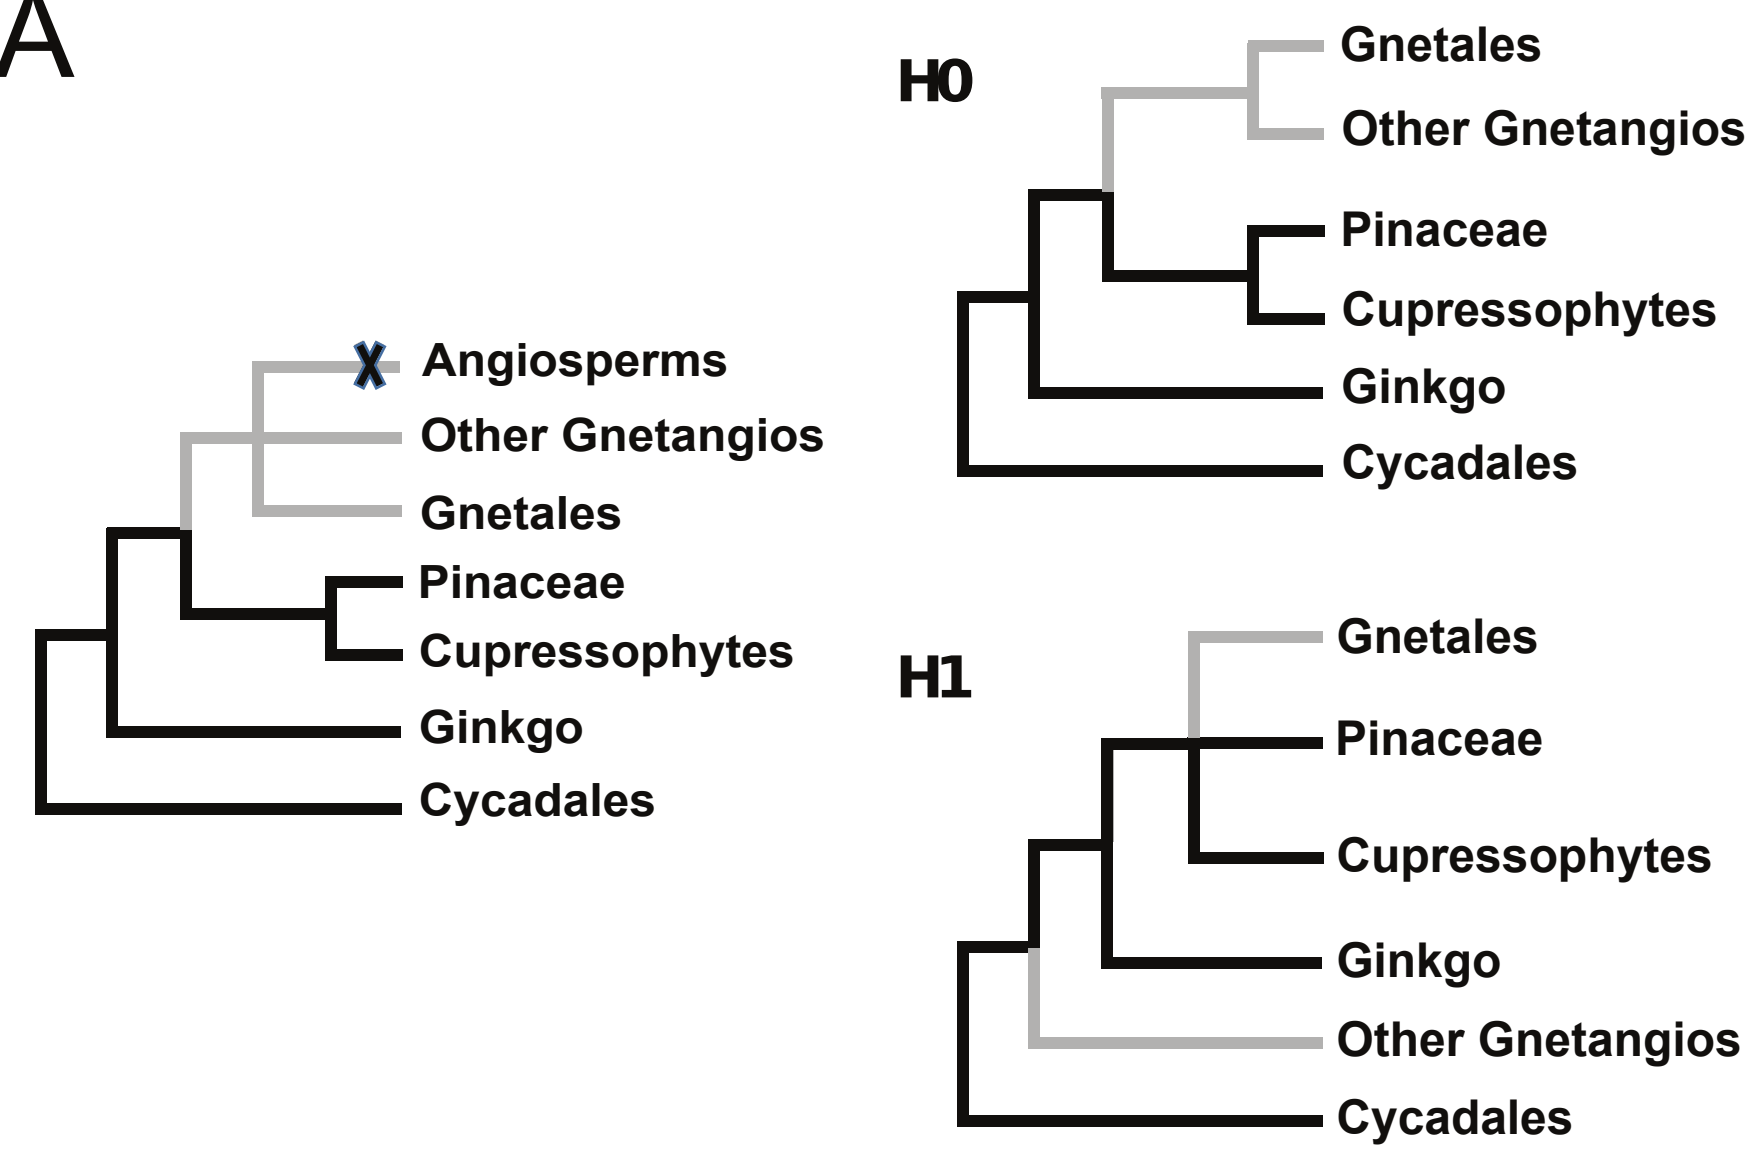

B

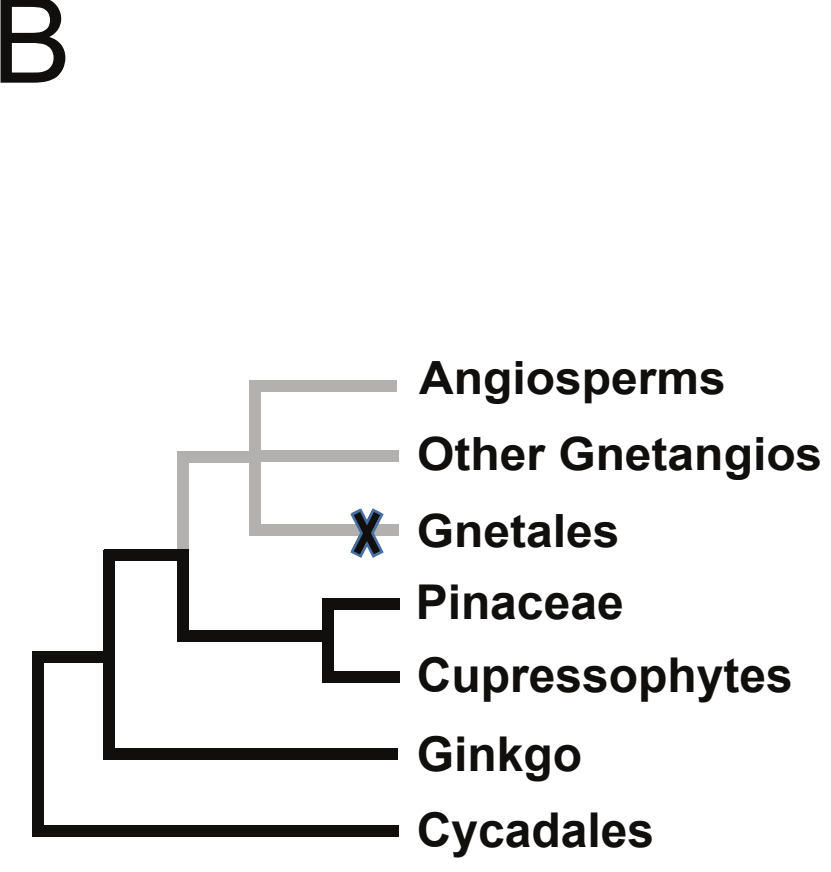

C

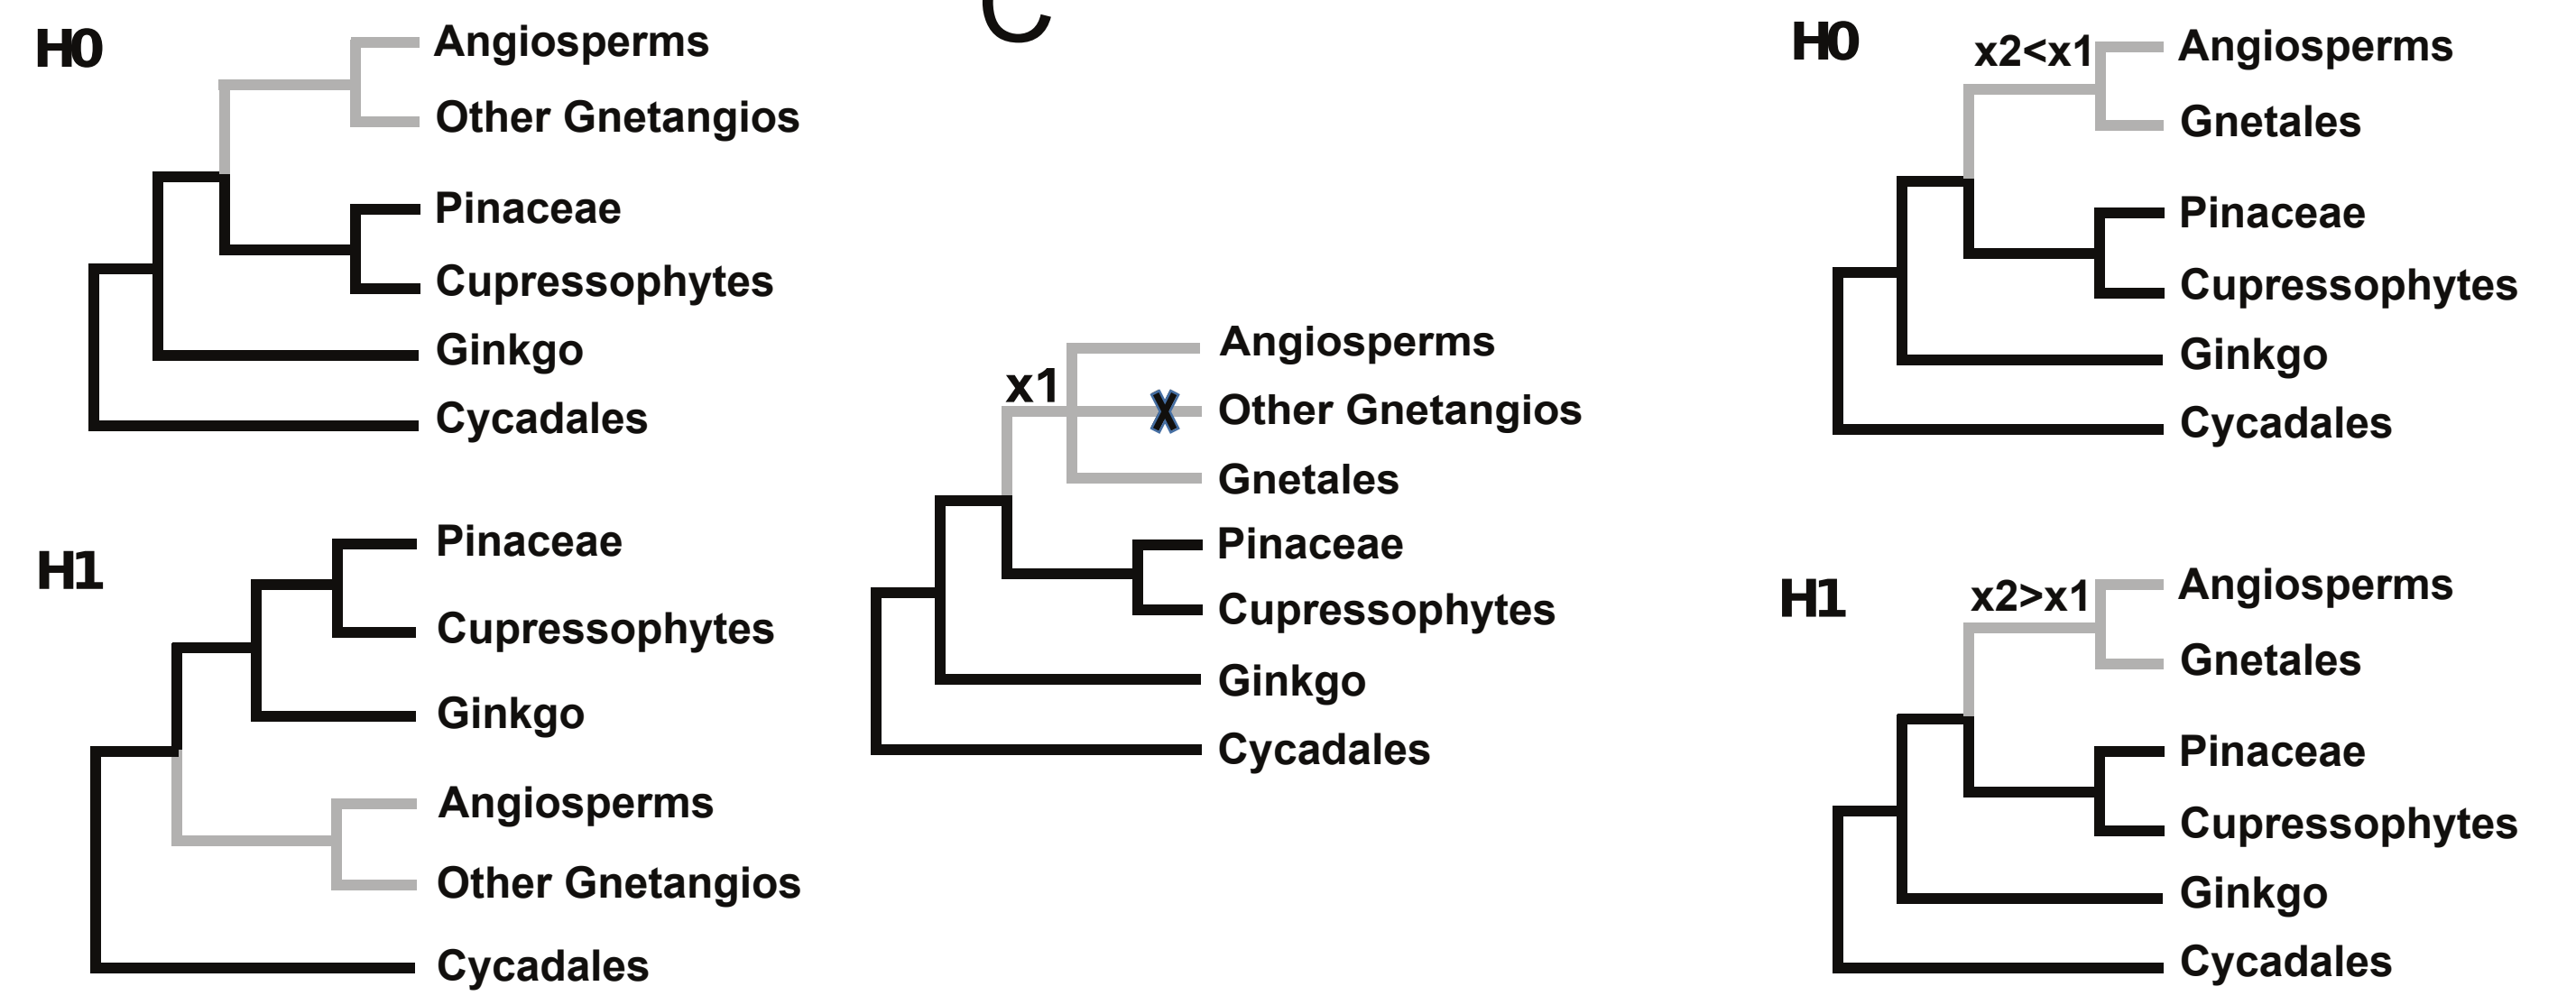

D

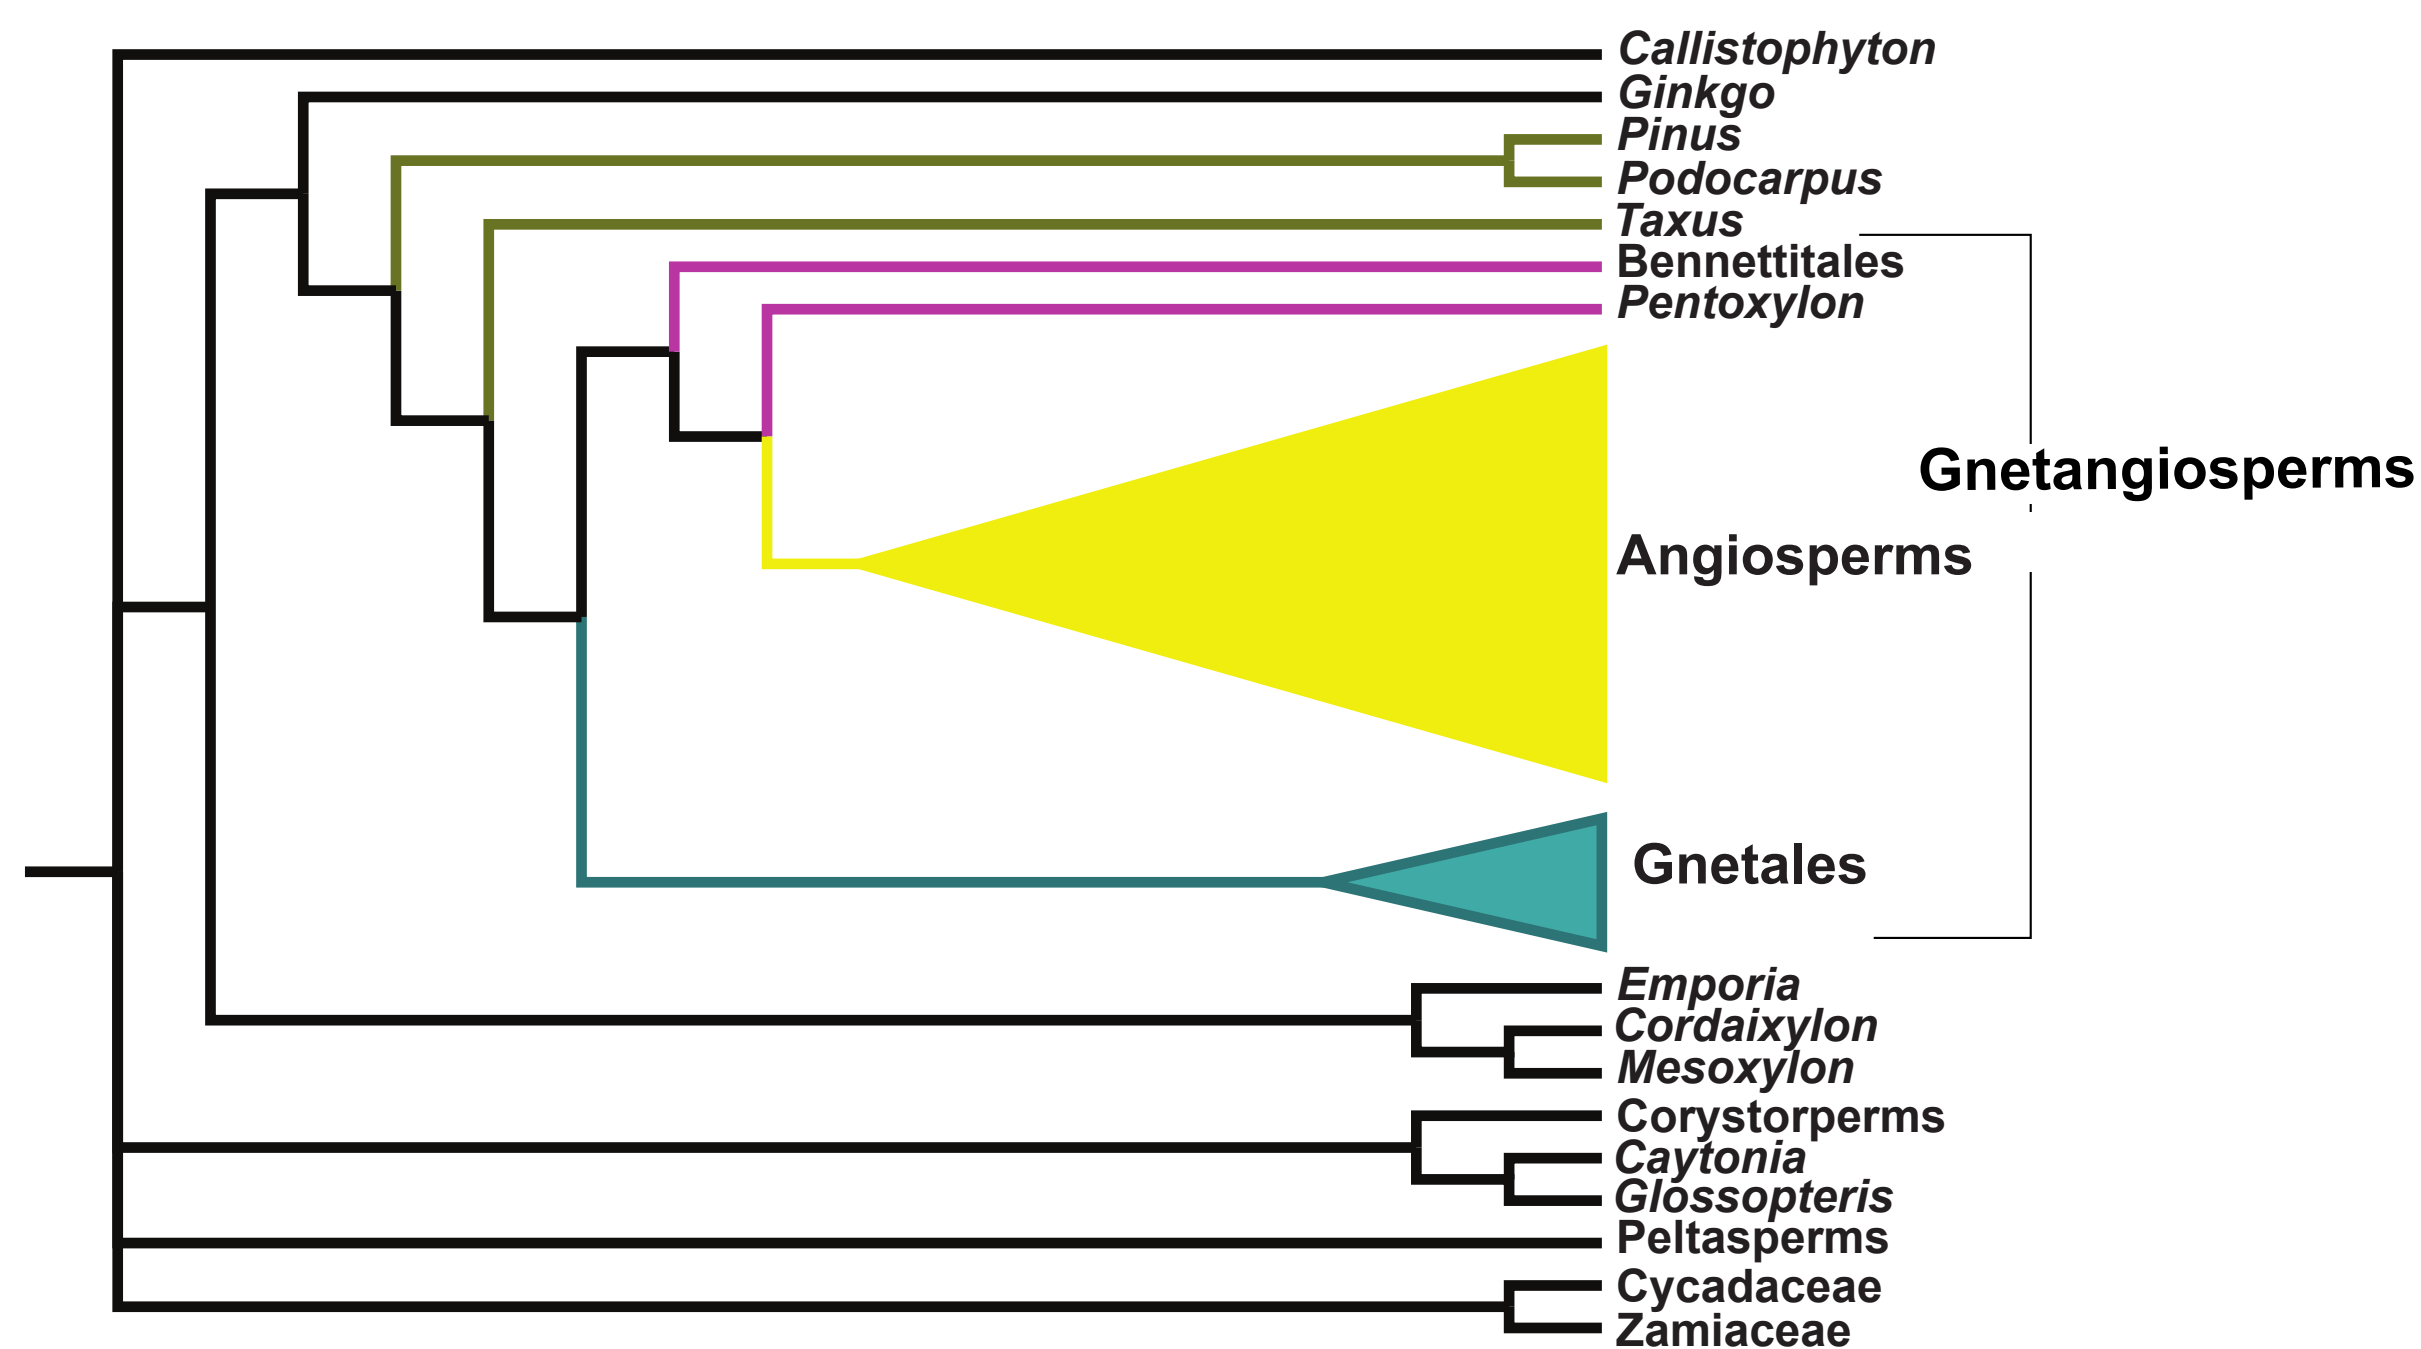

E

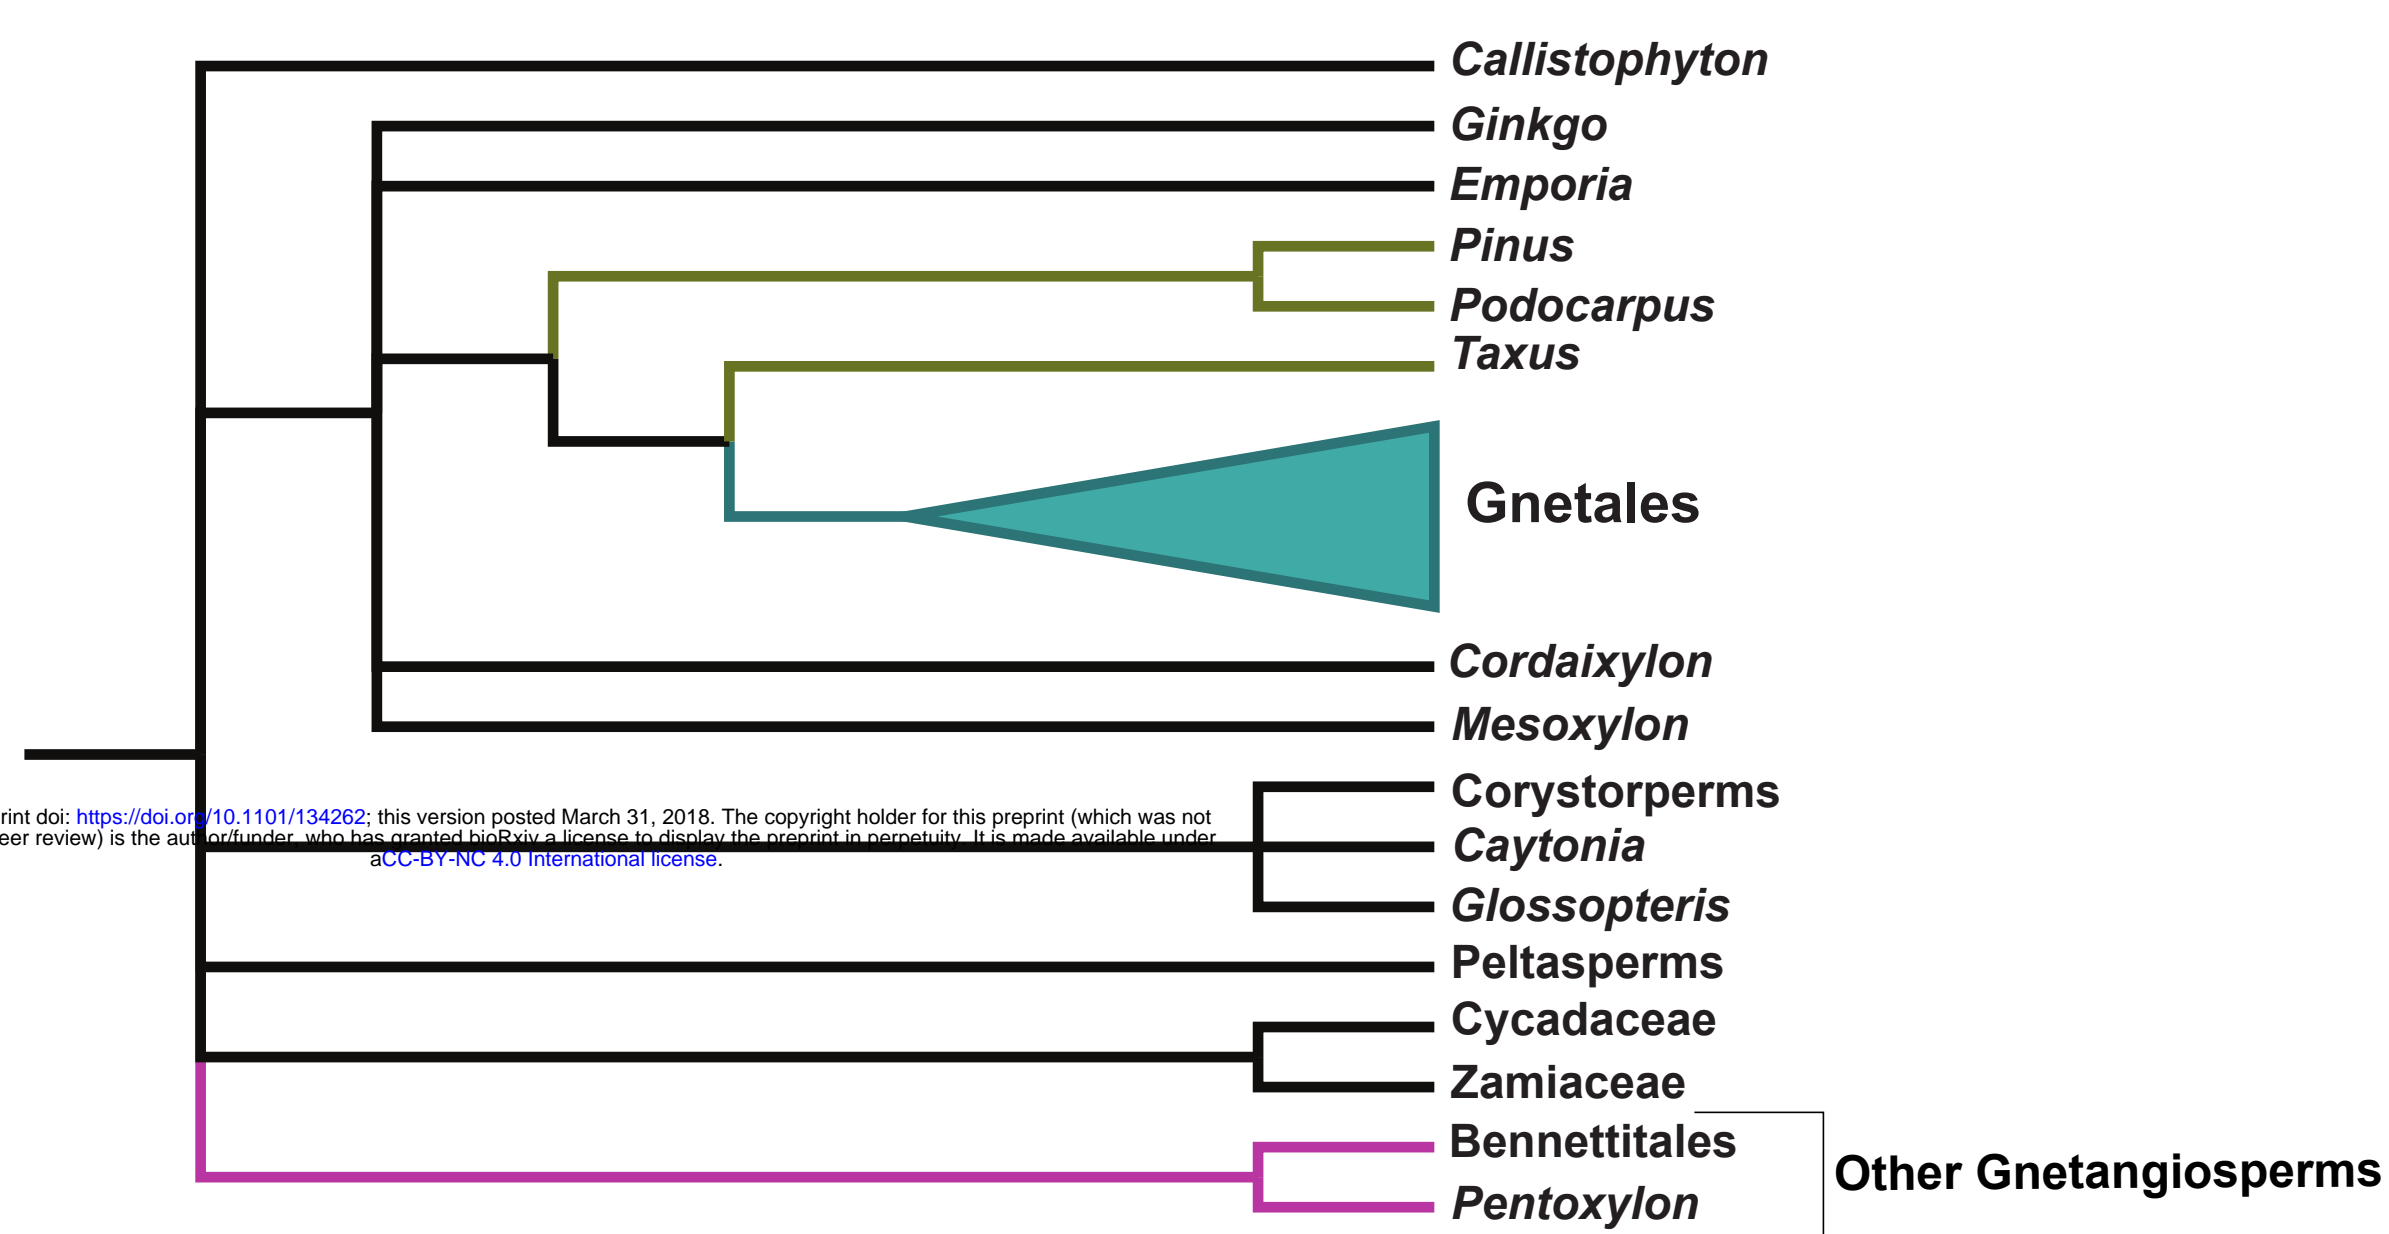

F

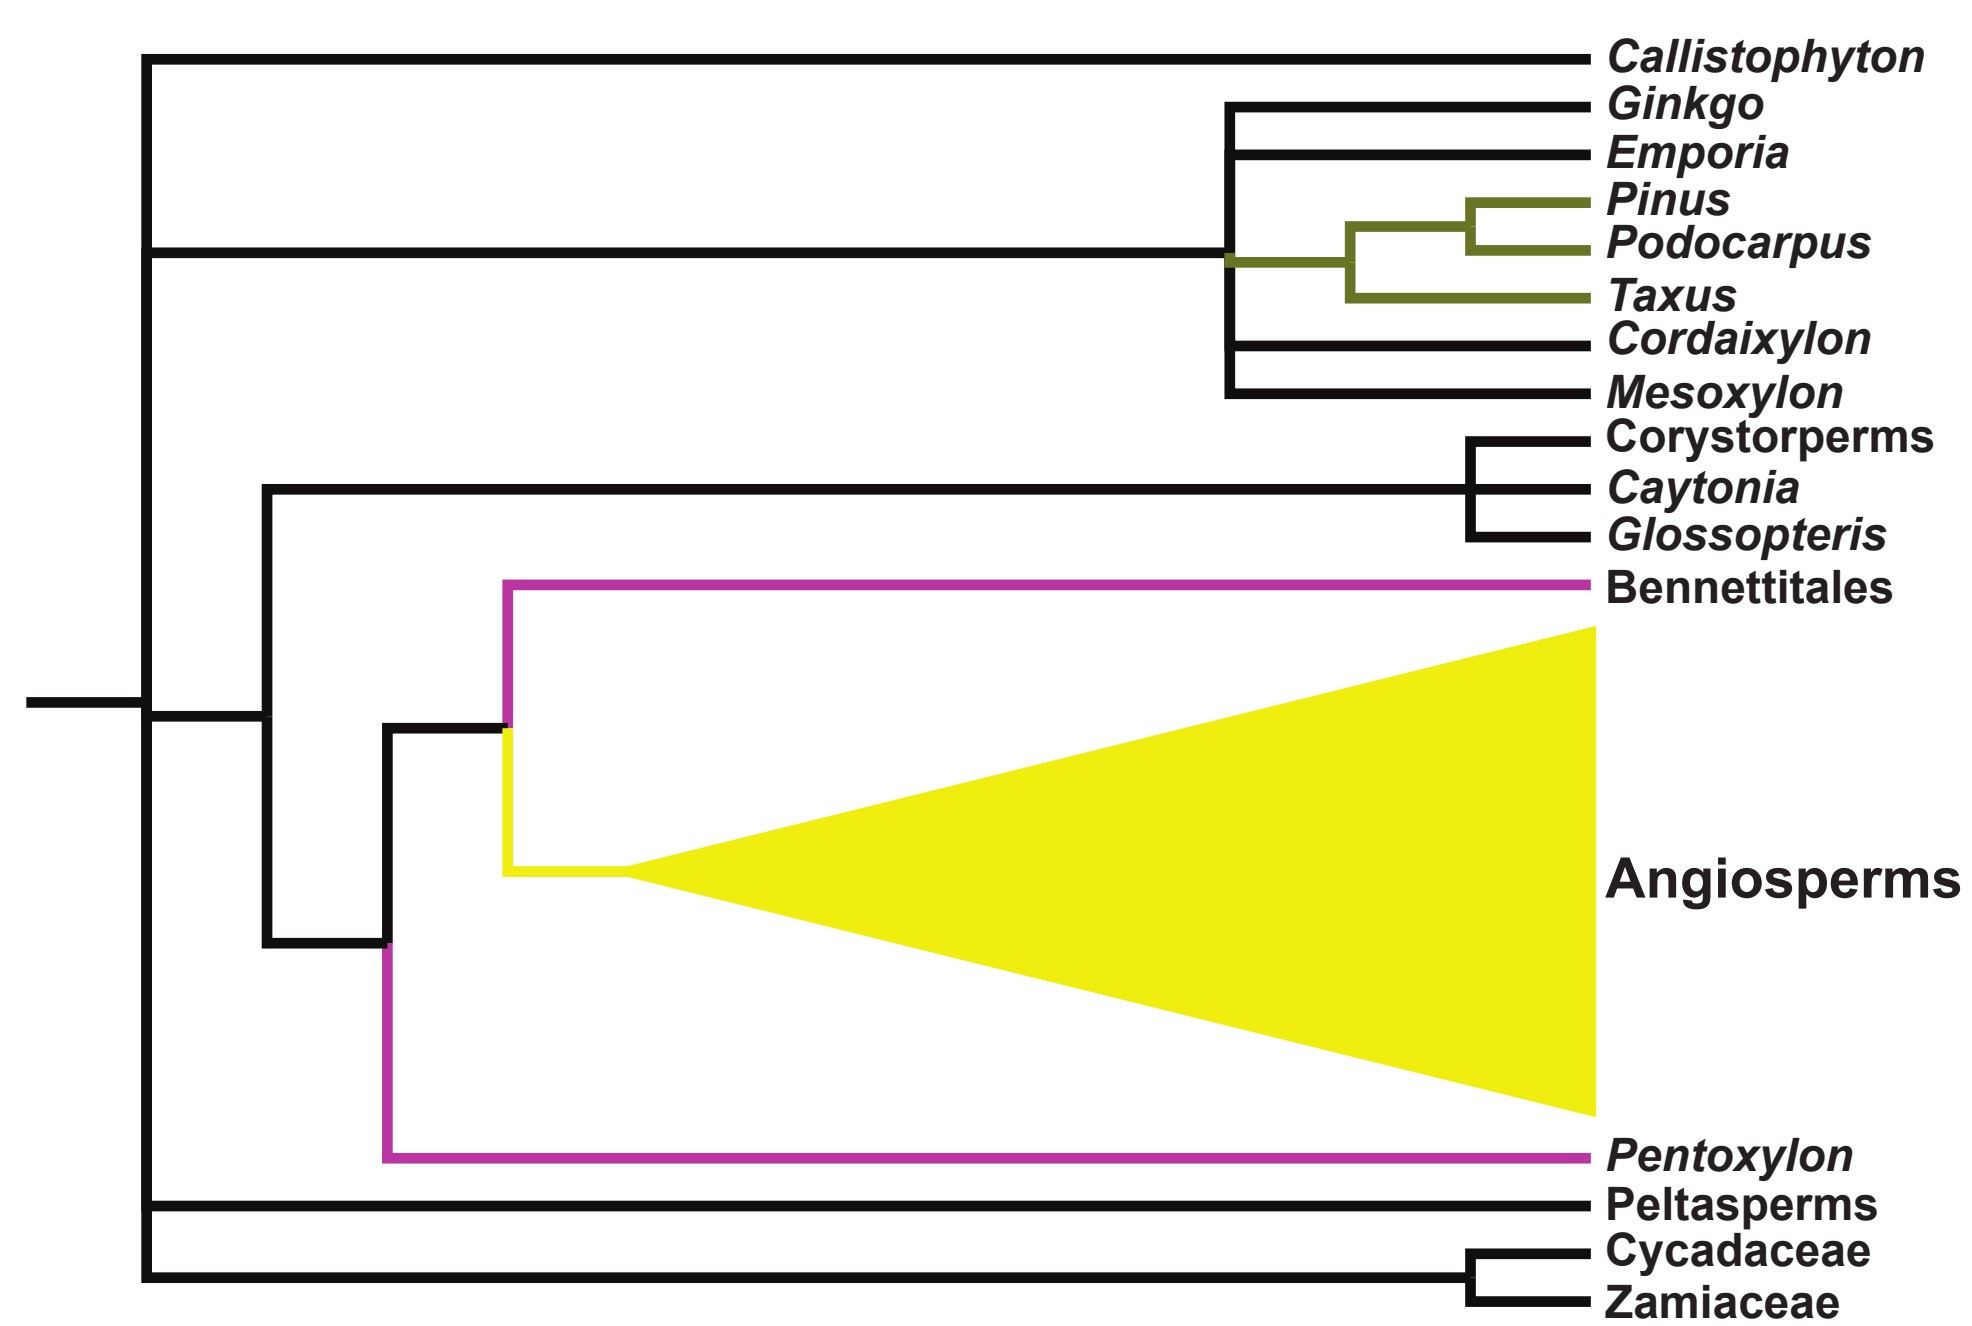

G

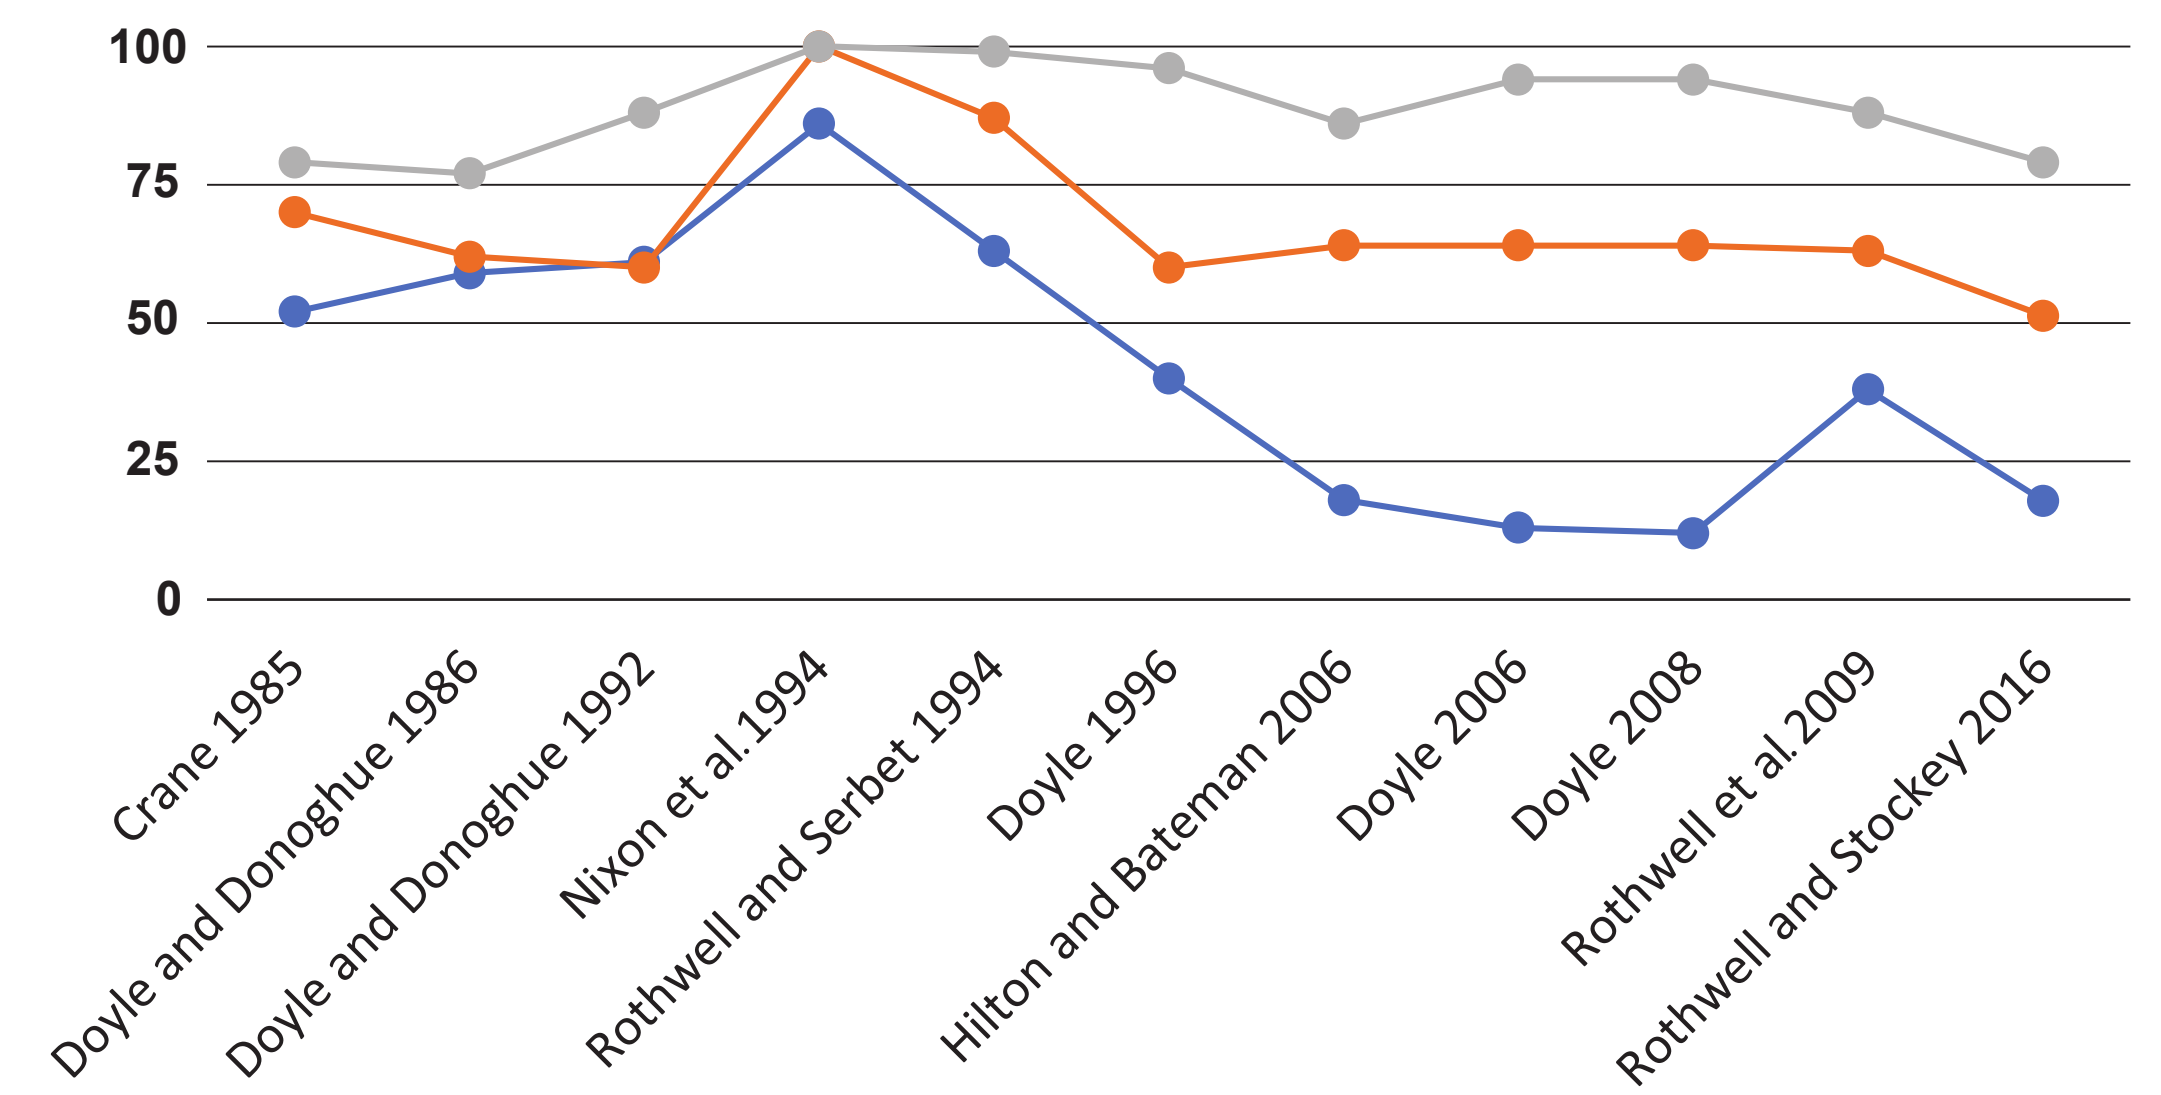

H

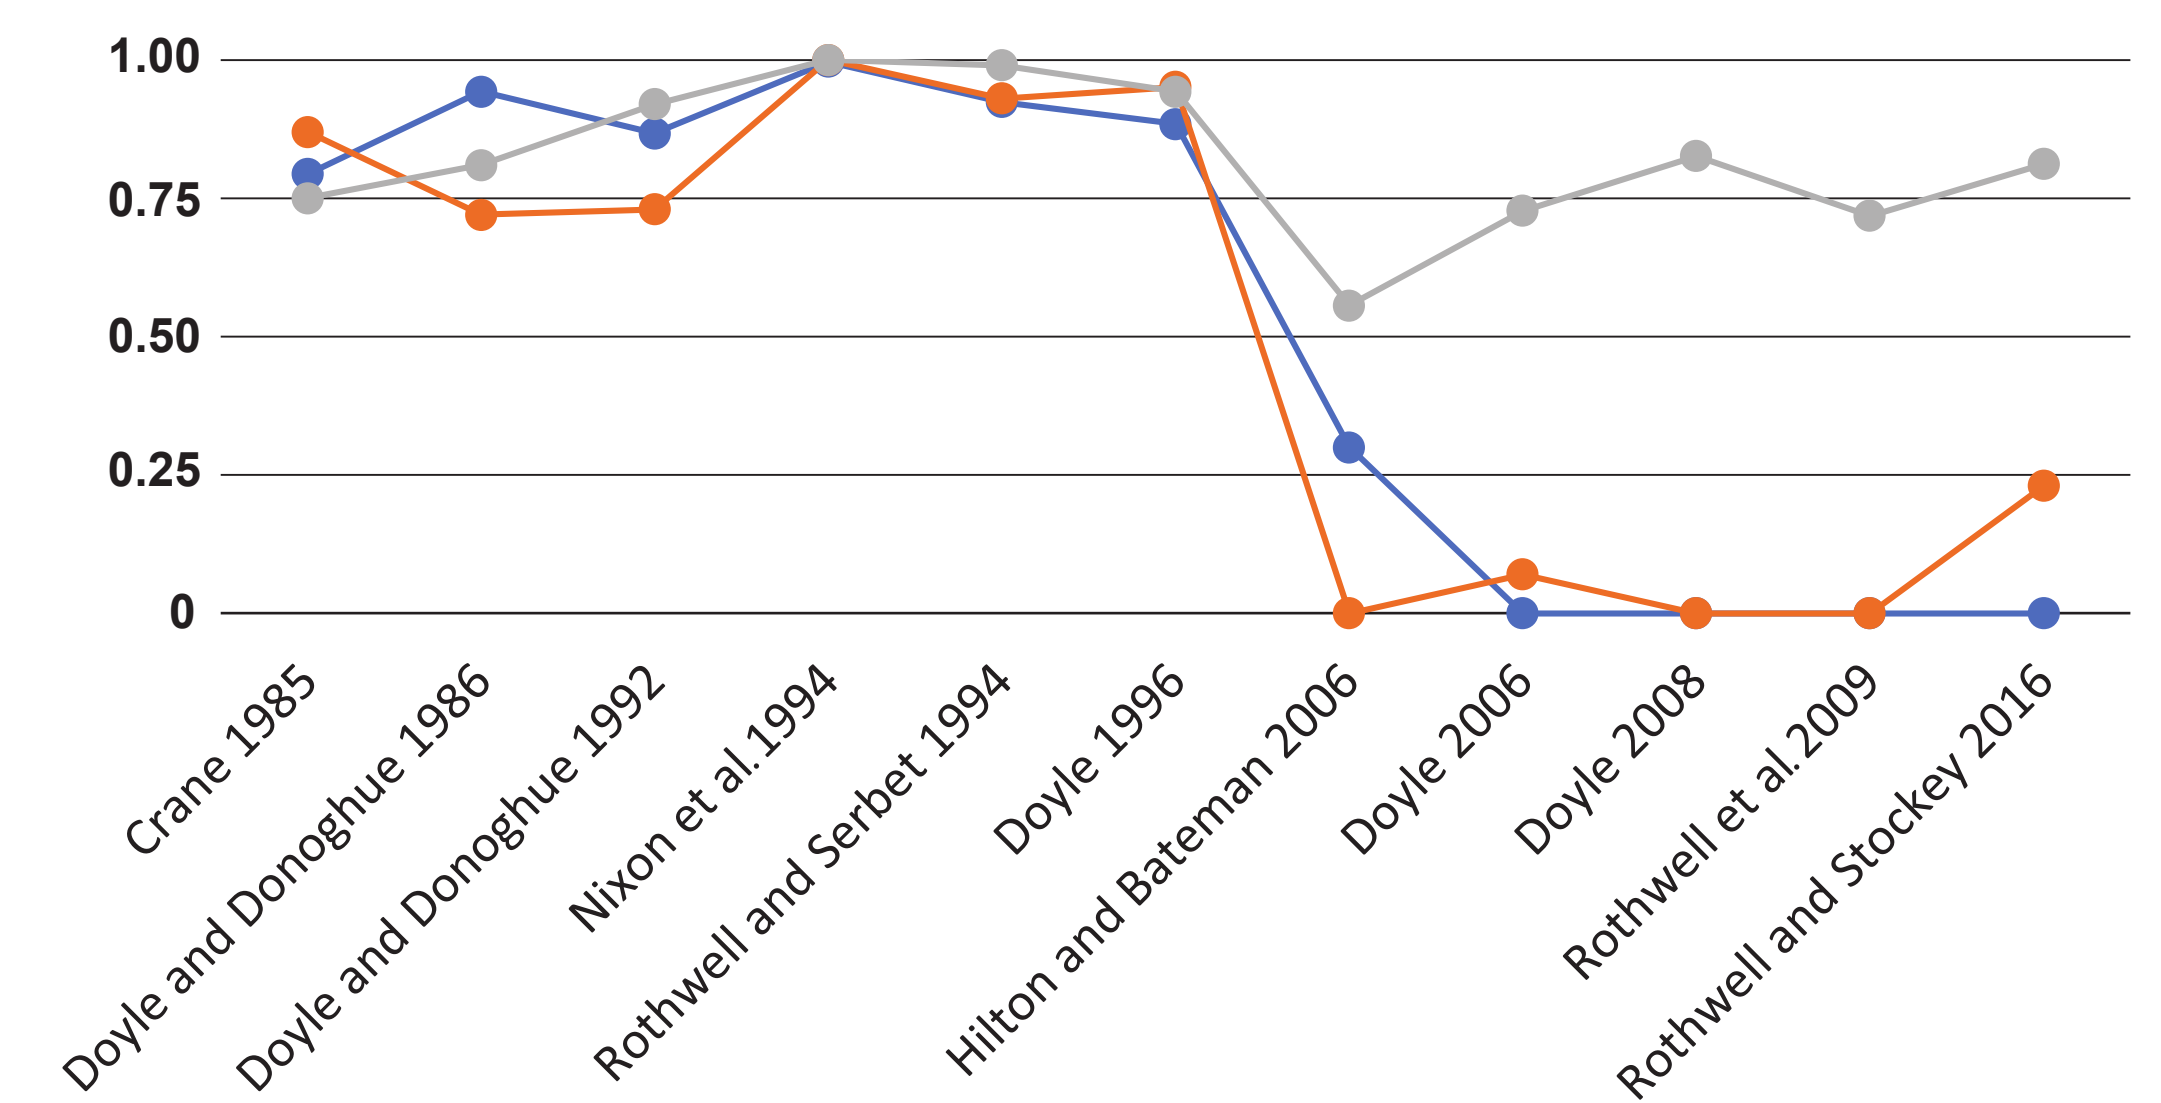

I

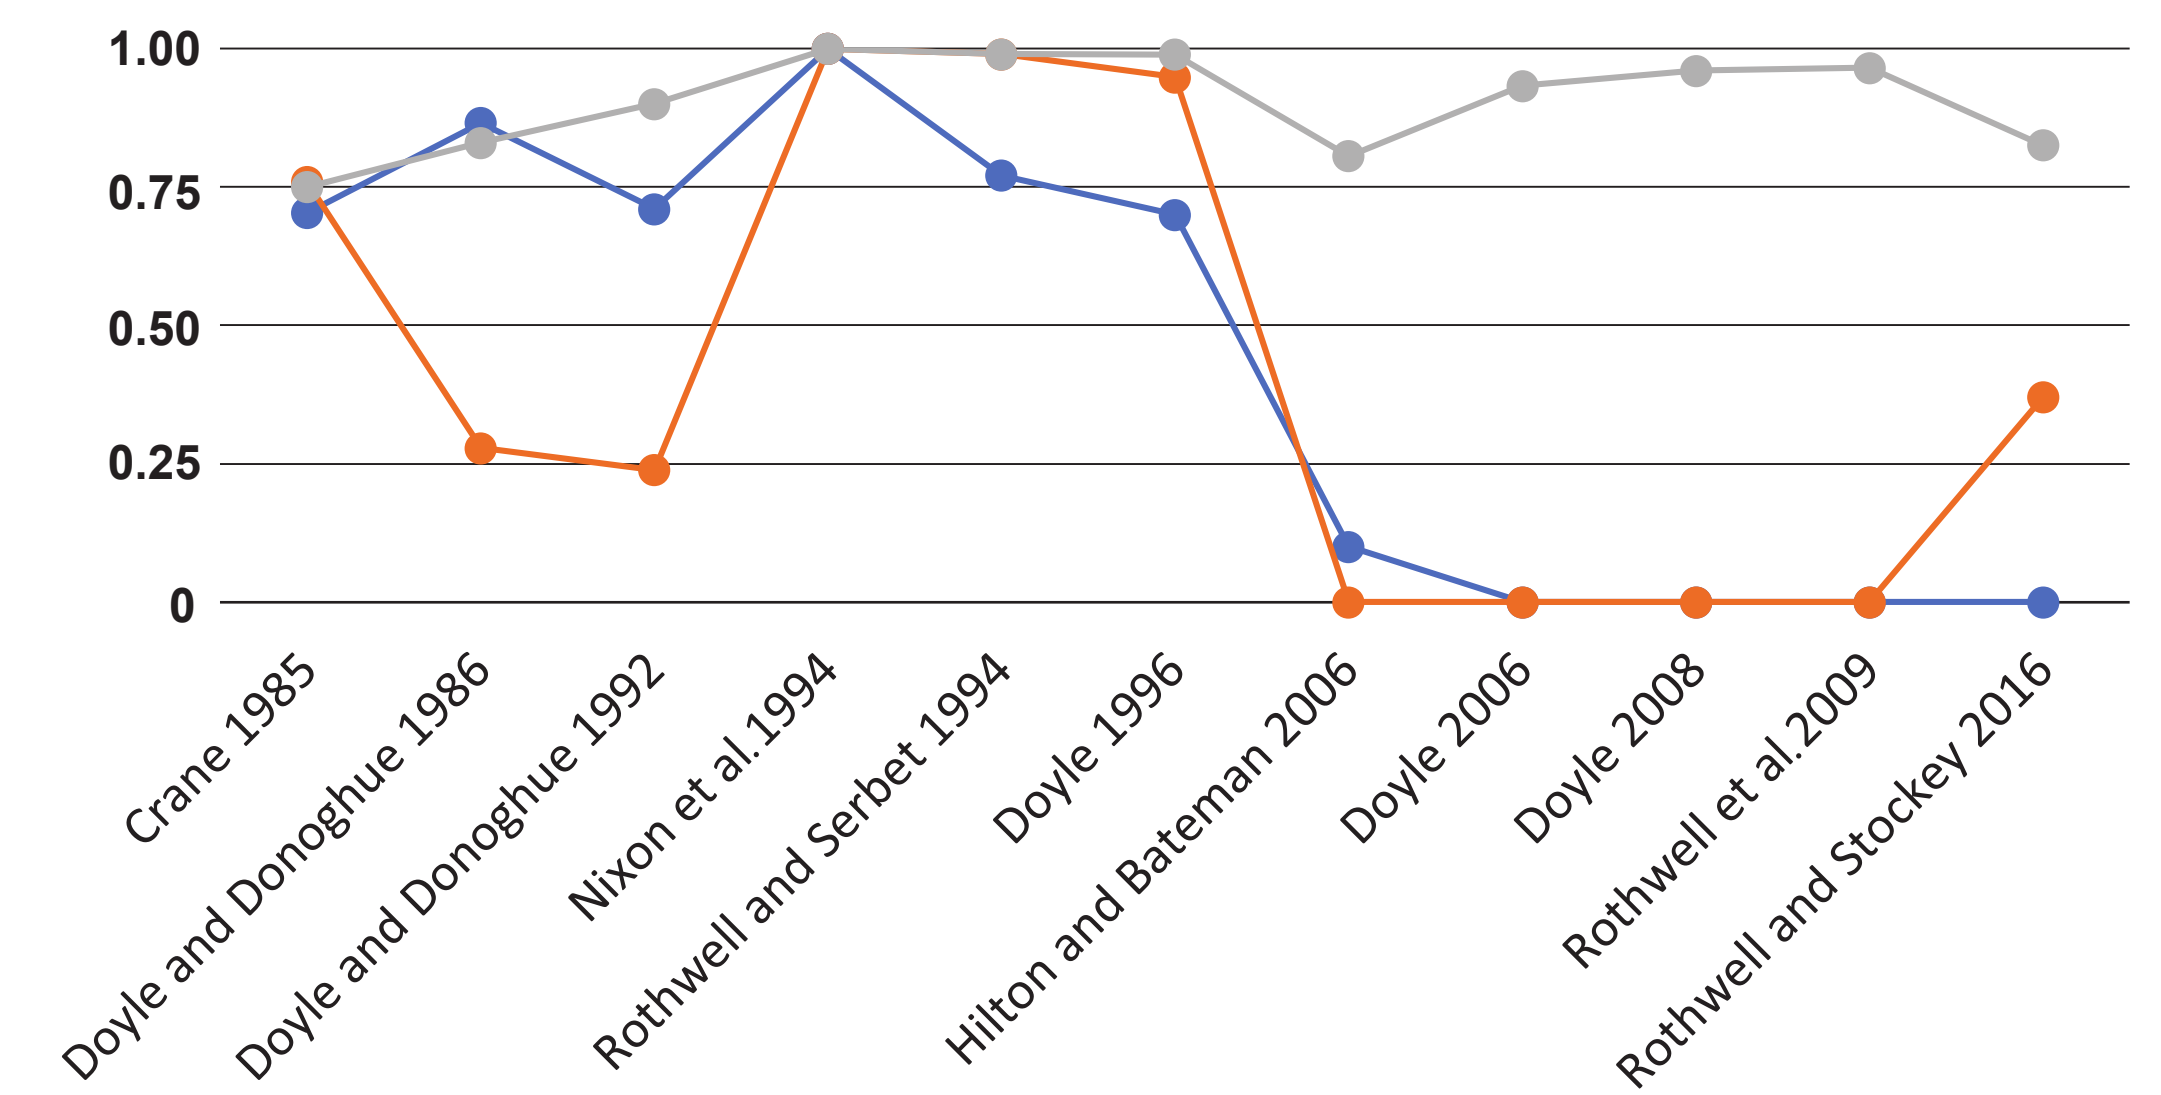

● Total matrix  
● Branch extraction  
● Extant only

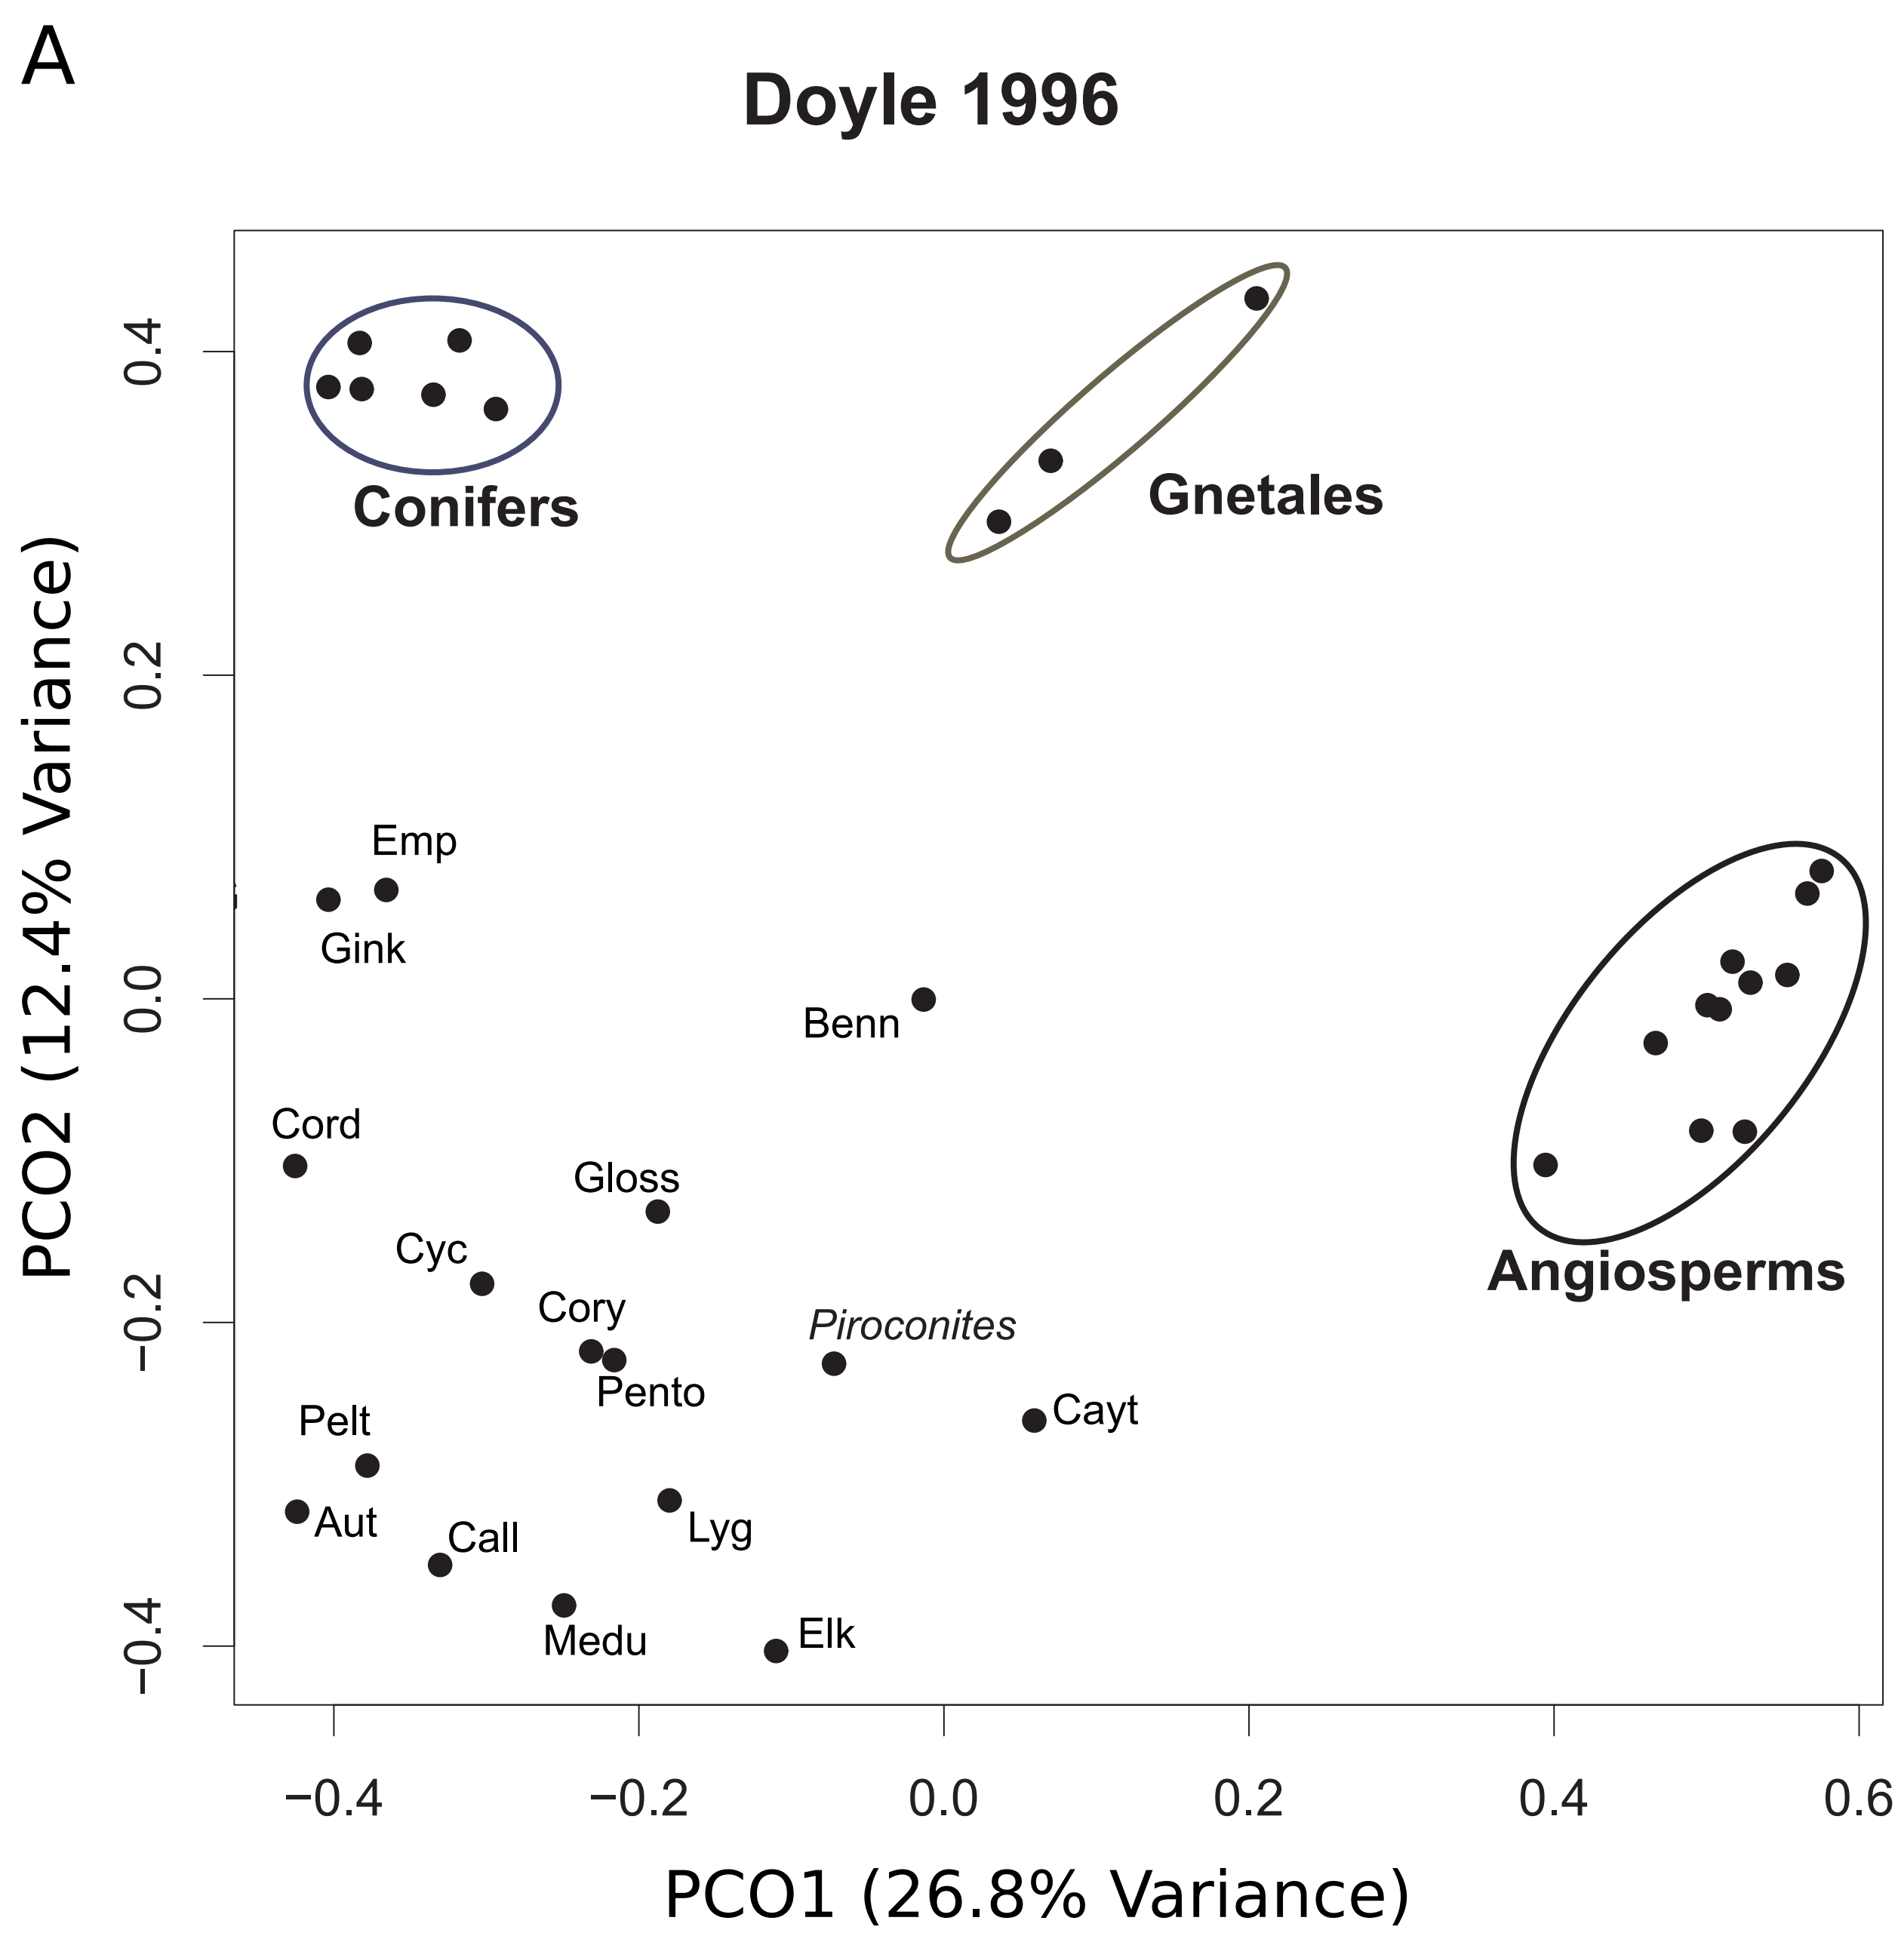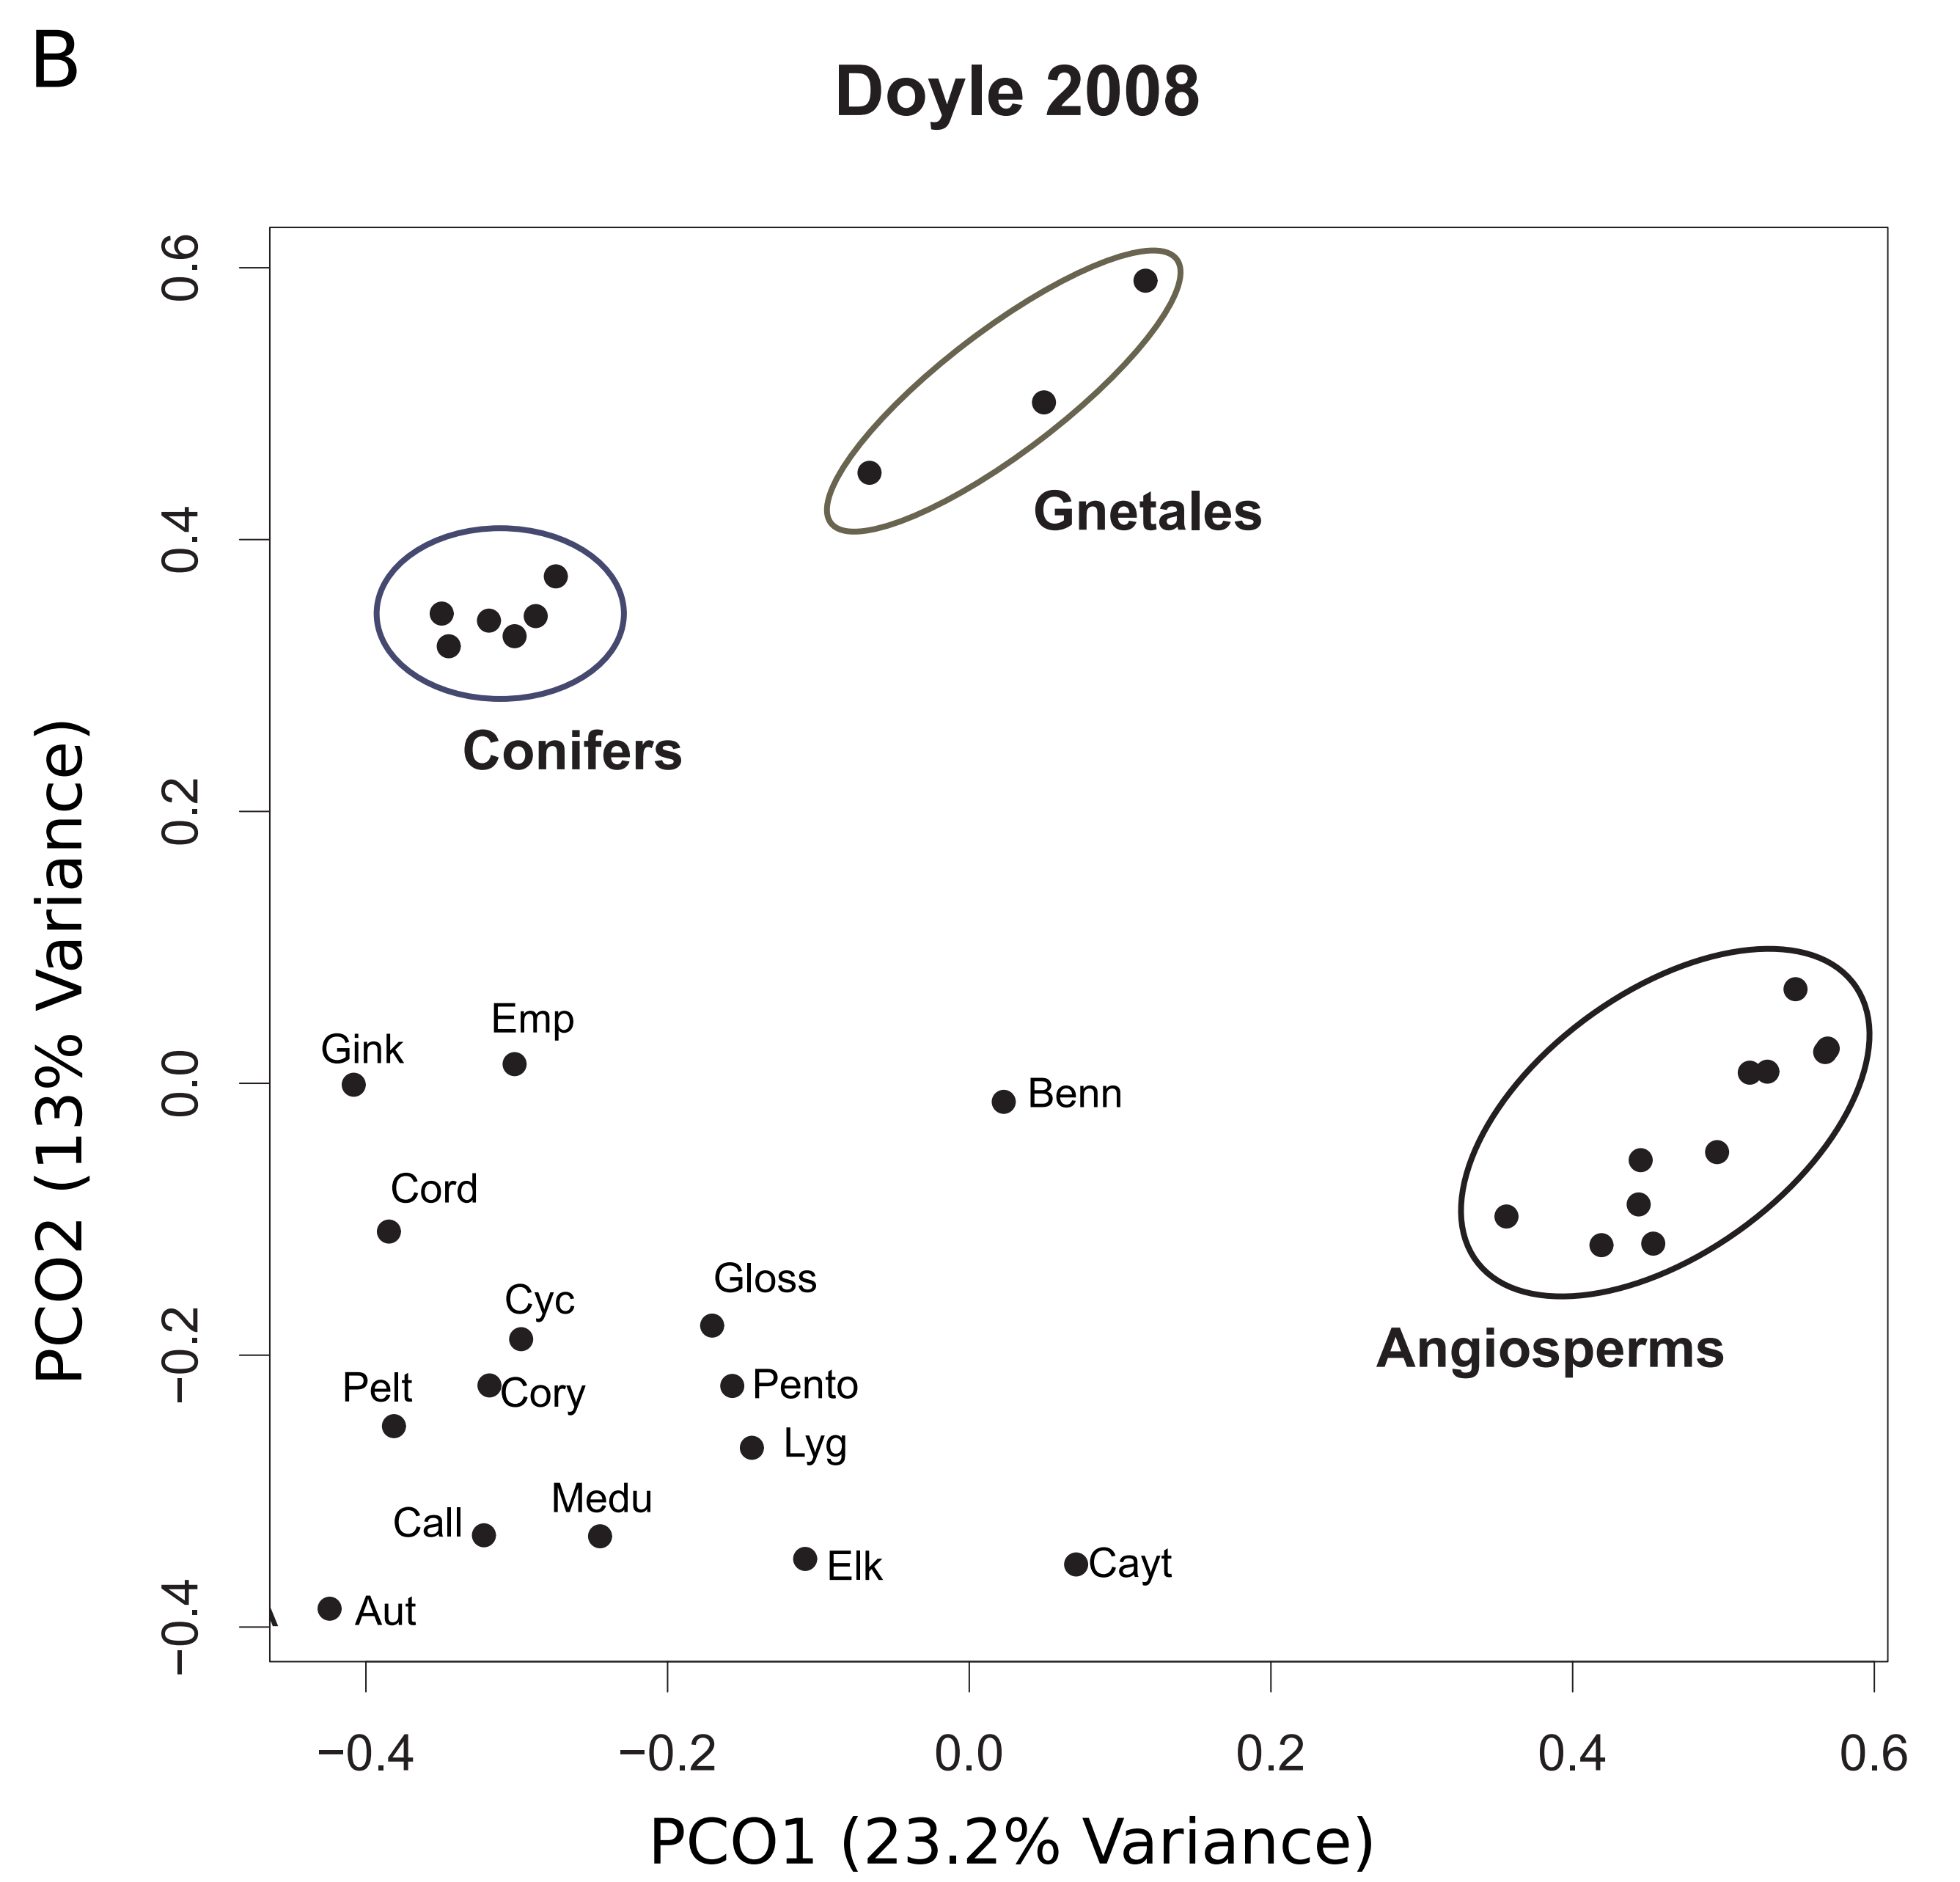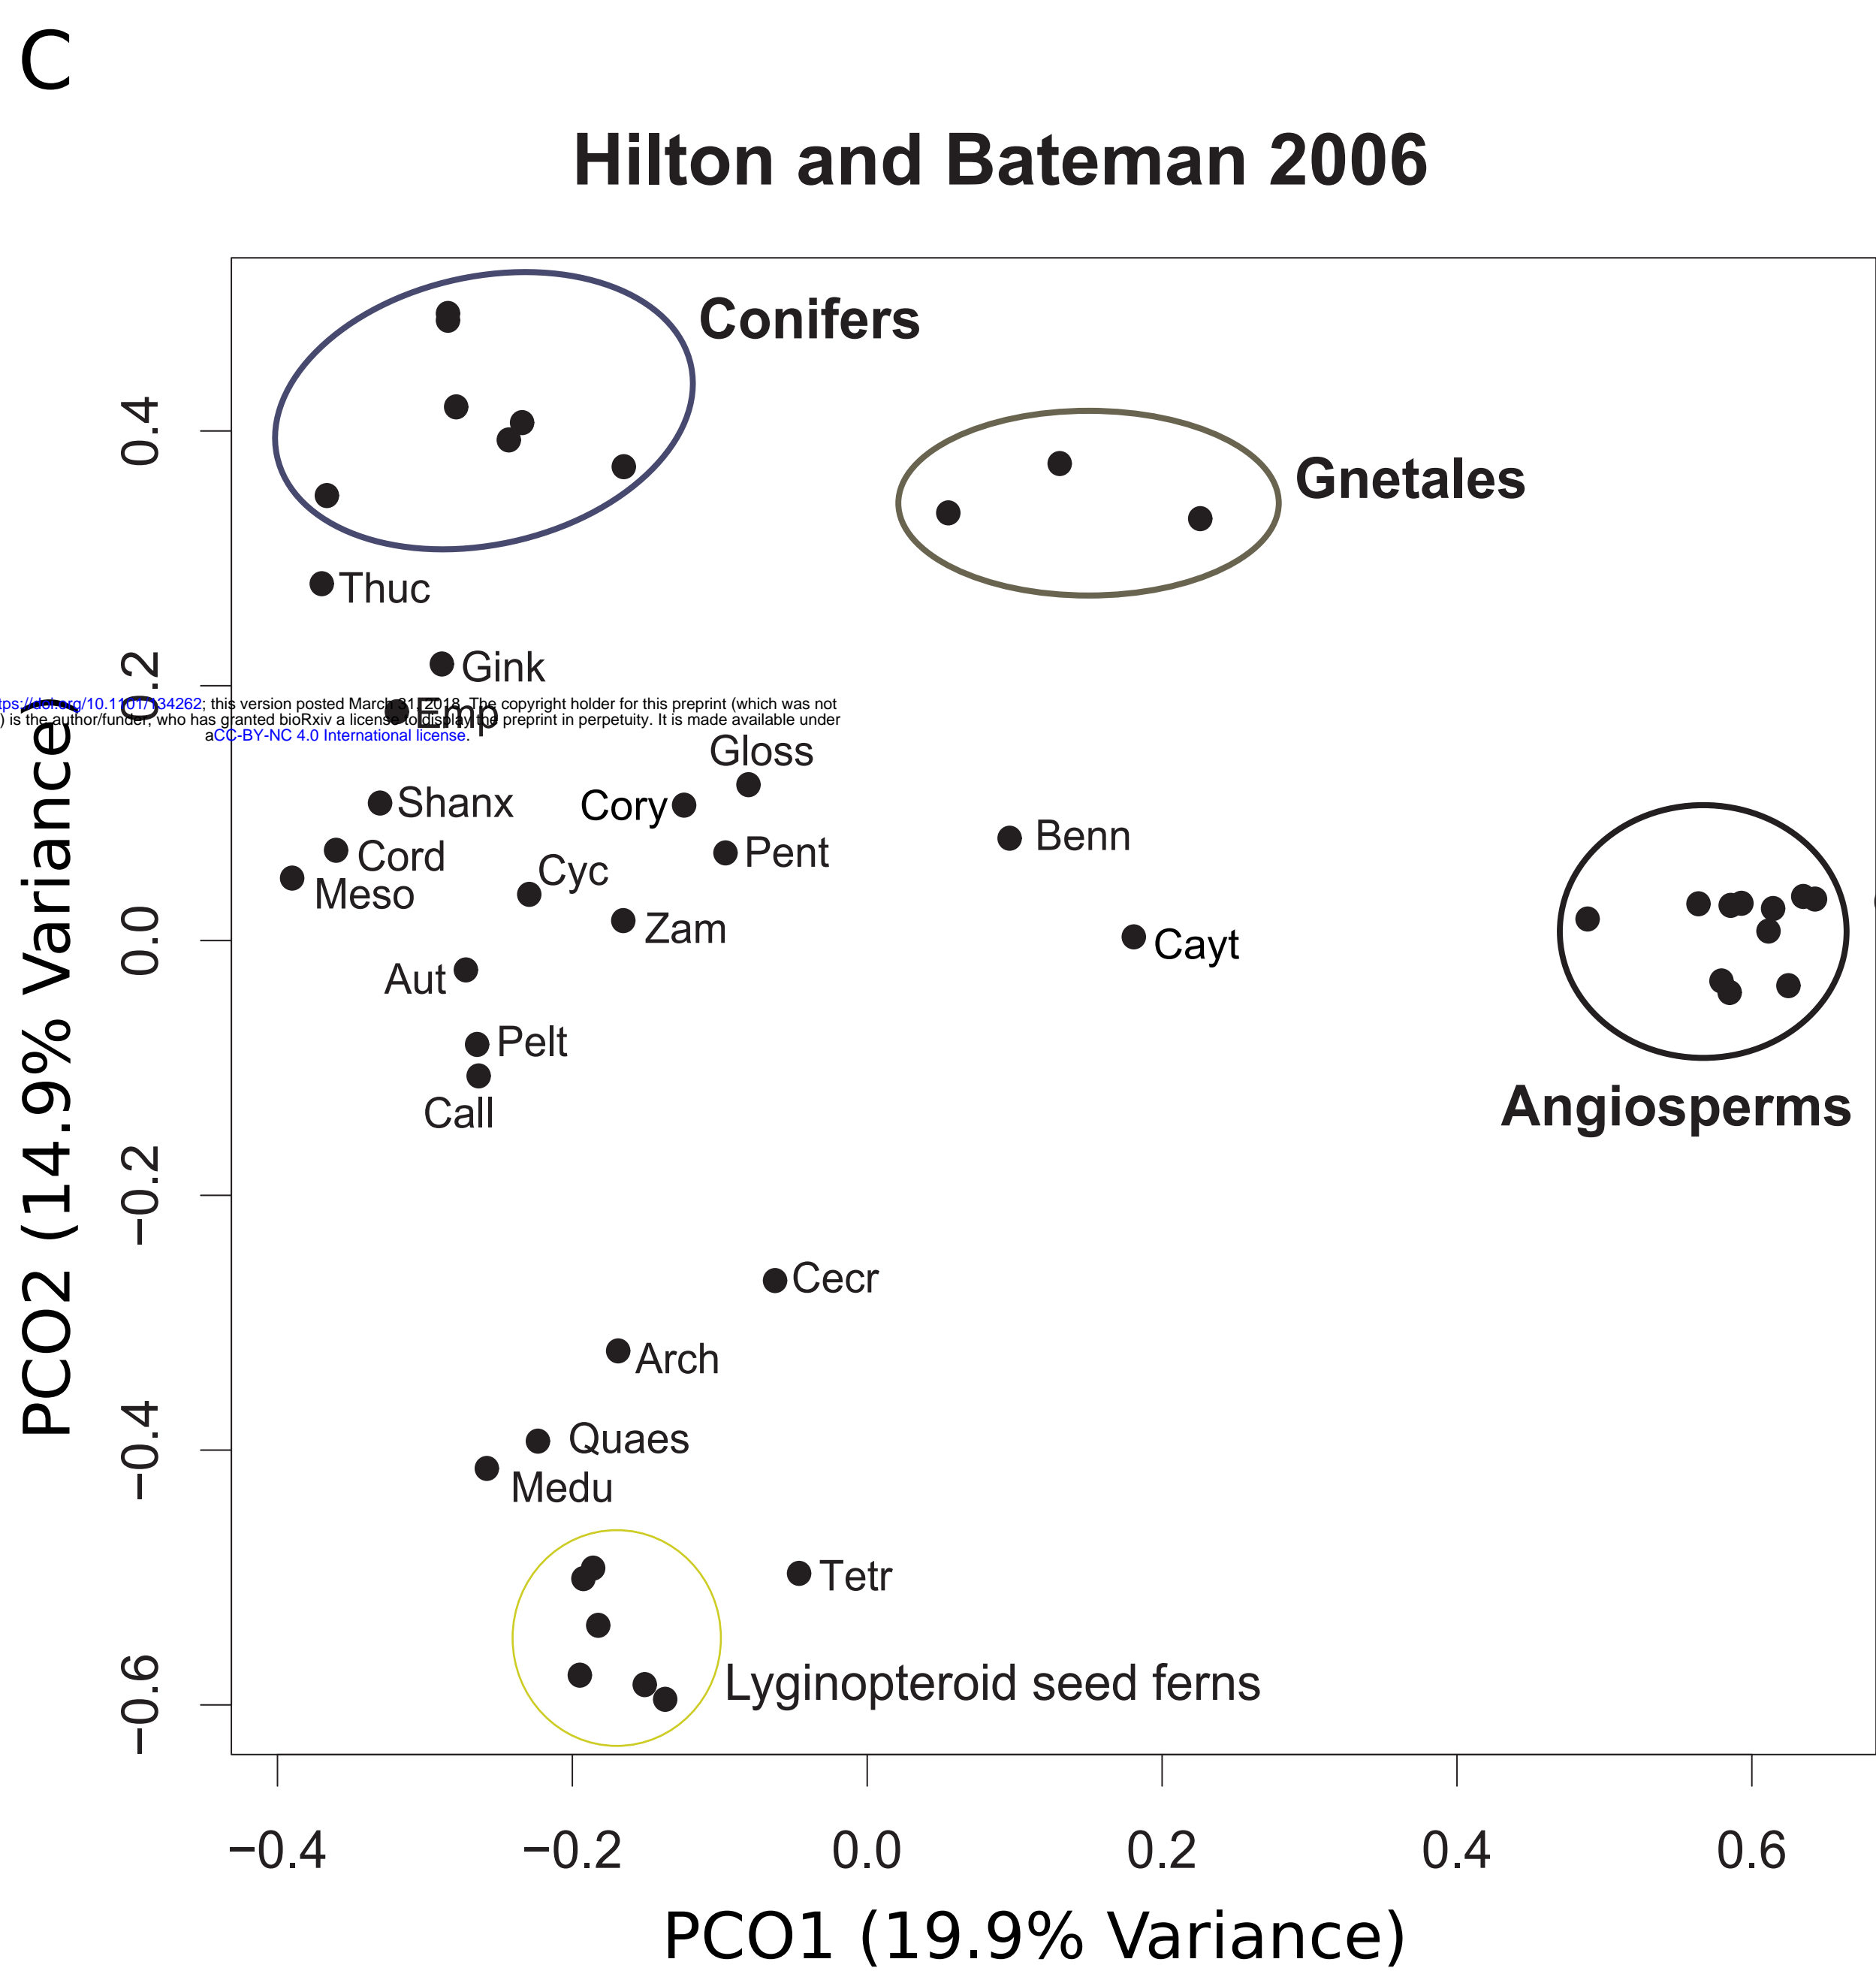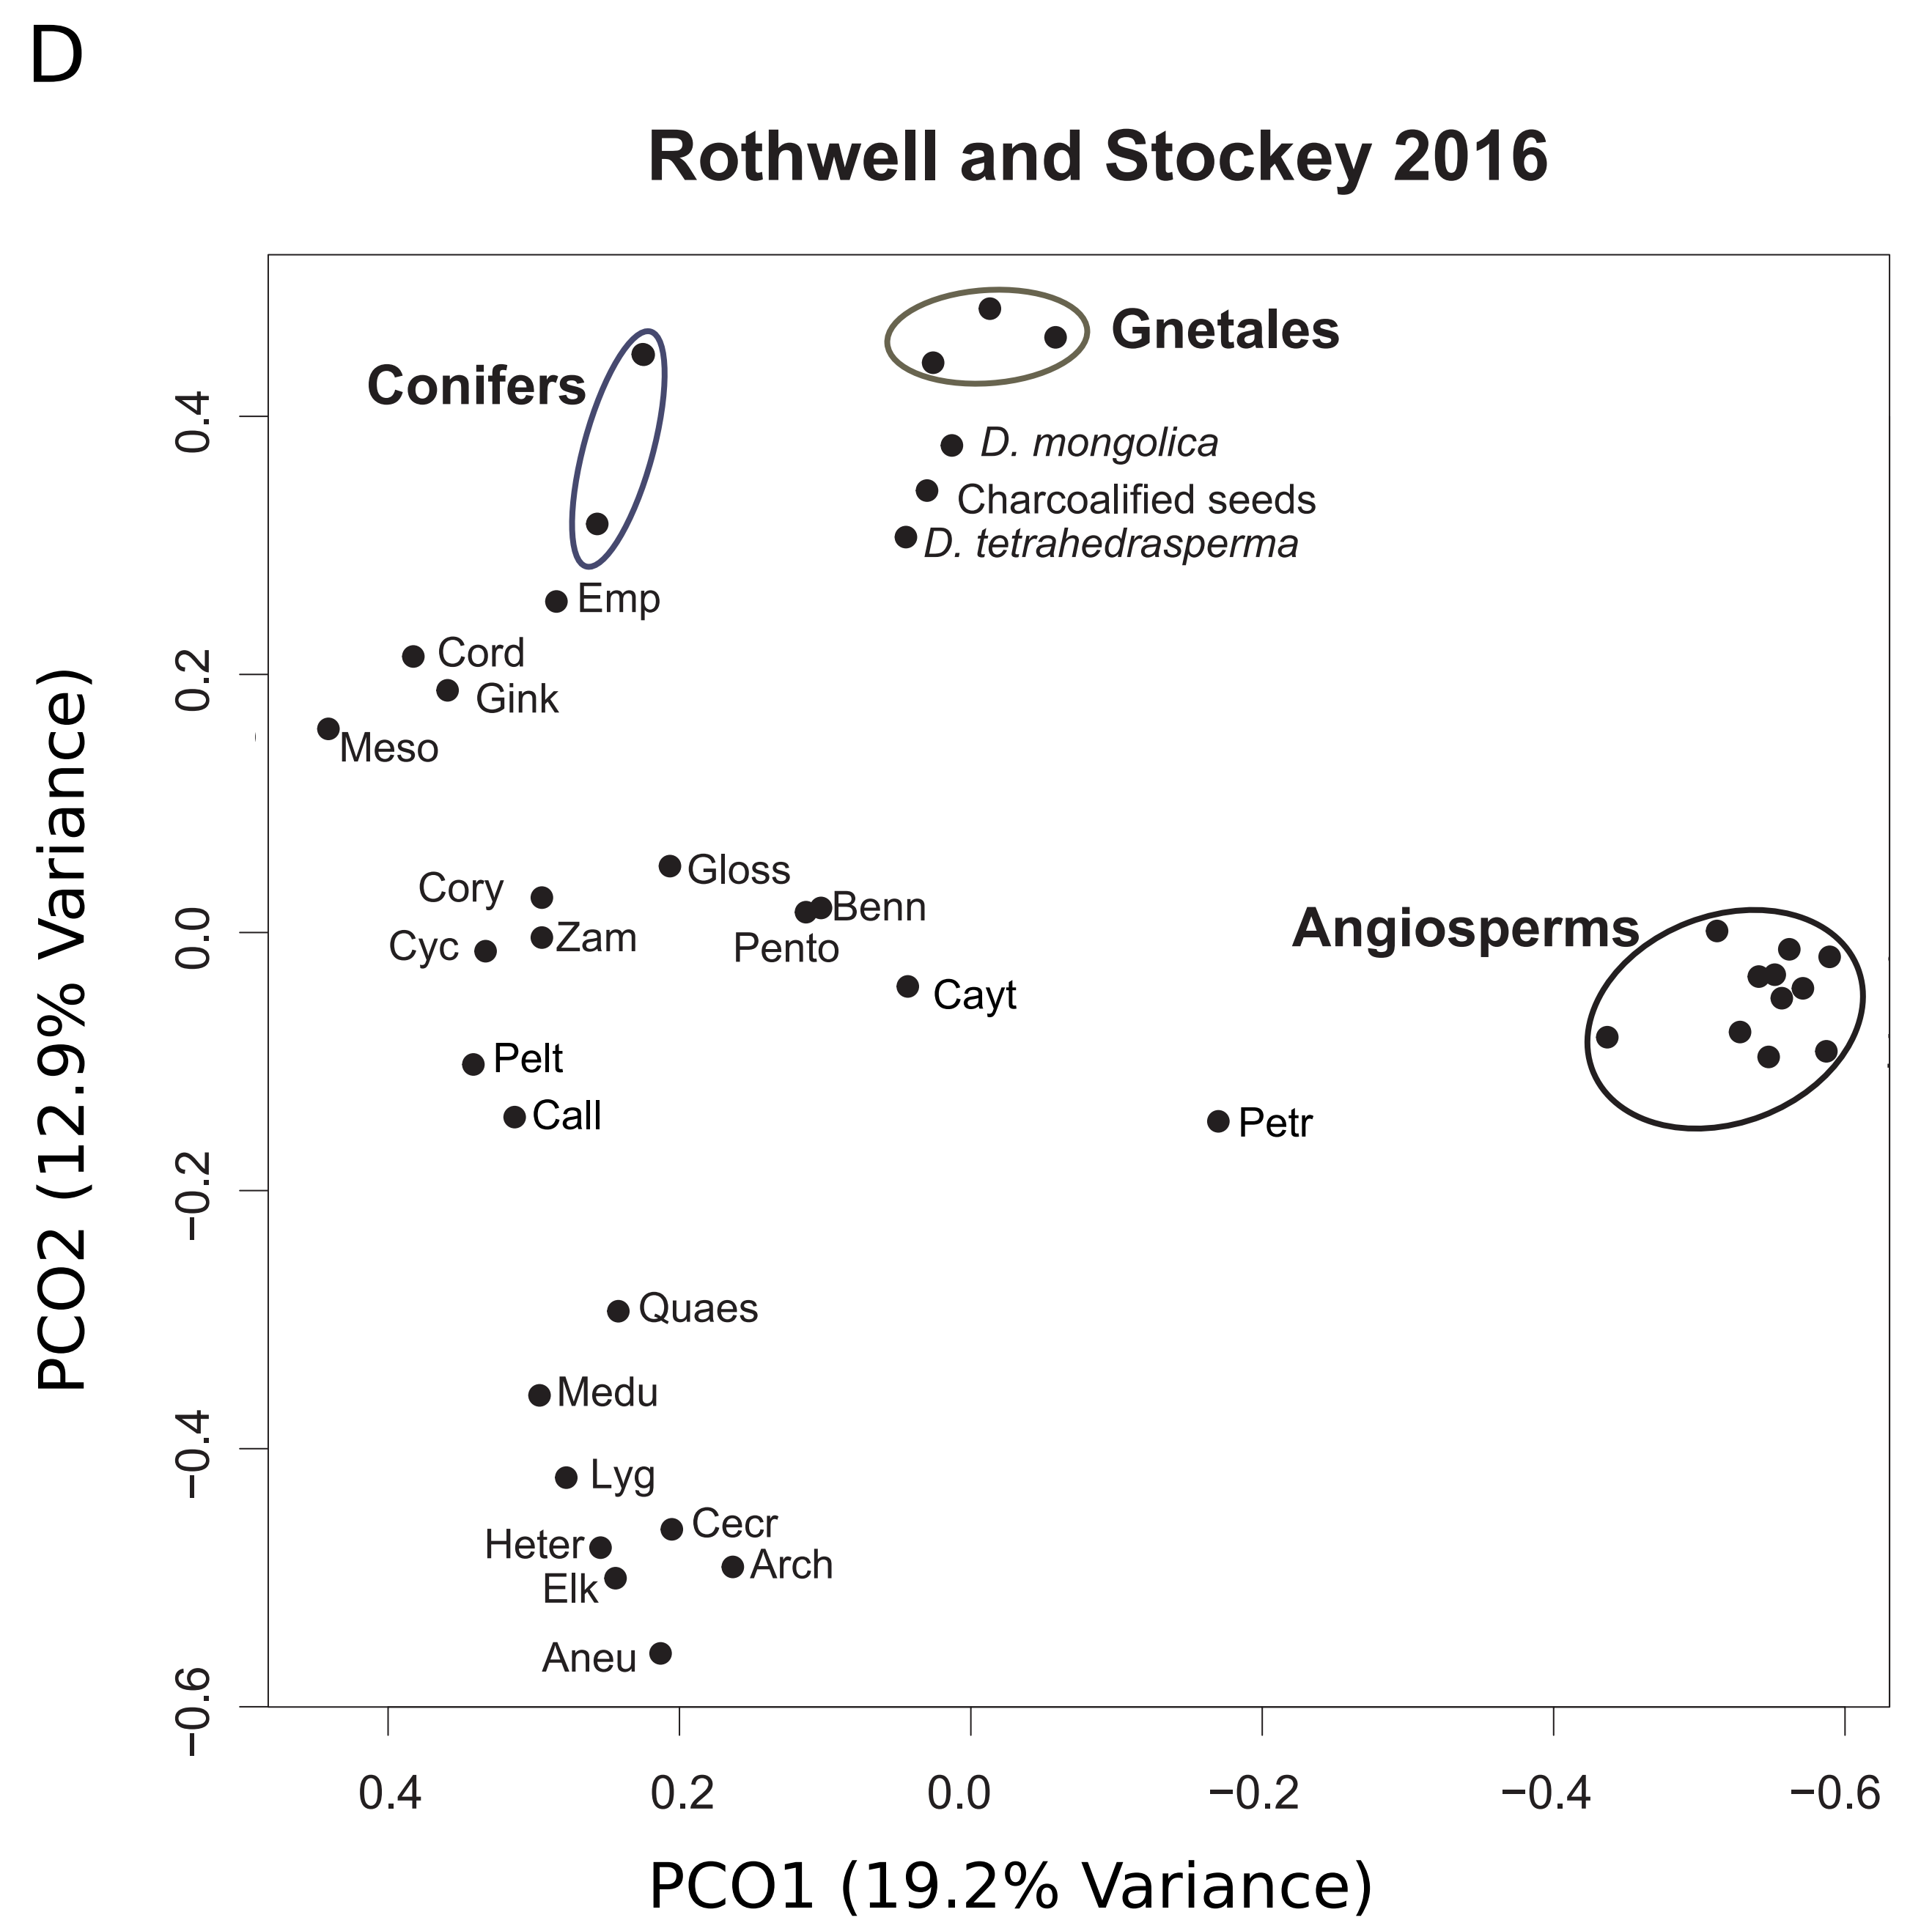

Source: http://biorxiv.org/content/10.1101/134262v3.full.pdf
